# Supplementary material for: Noncanonical MicroRNAs and Endogenous siRNAs in Lytic Infection of Murine Gammaherpesvirus
Source: PubMed Central journal article supplement (PMC3482243; doi:10.1371/journal.pone.0047863), 2012-10-26

**Supplemental Figure S1. Flowchart describing the major steps for novel miRNAs identification.**

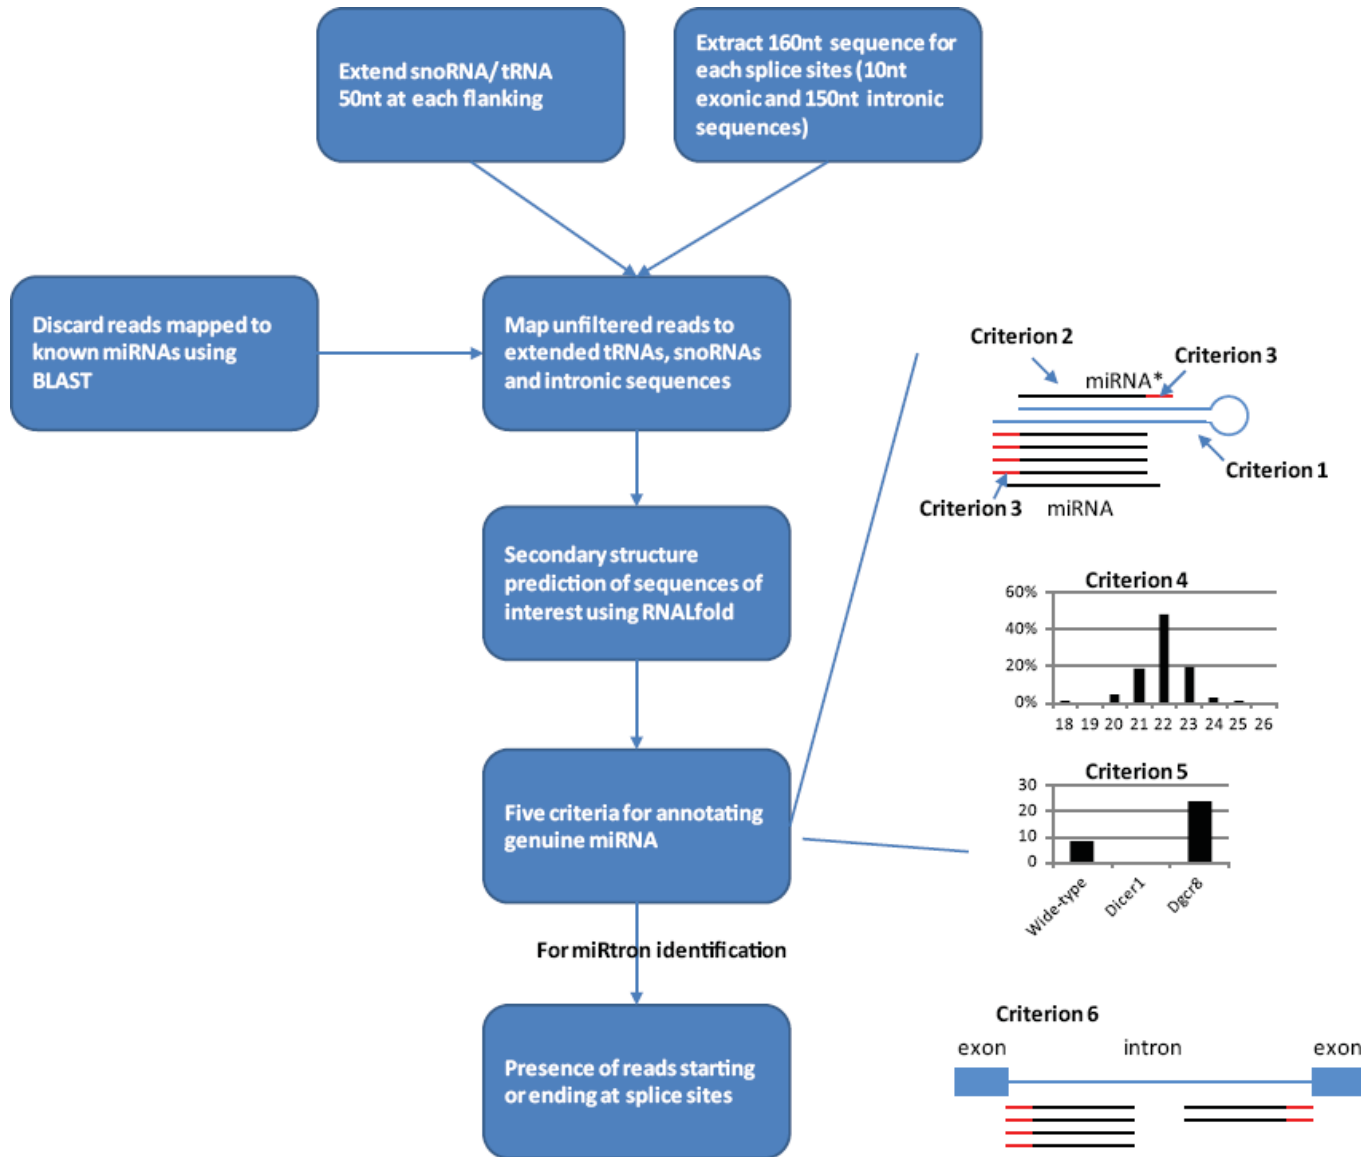

Supplement: pone.0047863.s001.pdf [file pone.0047863.s001.pdf]
