# Supplementary material for: Noncanonical MicroRNAs and Endogenous siRNAs in Lytic Infection of Murine Gammaherpesvirus
Source: PubMed Central journal article supplement (PMC3482243; doi:10.1371/journal.pone.0047863), 2012-10-26

**Supplemental Figure S2. Normalized reads in wide-type, Dicer- and Dgcr8-knockout mice (GSE12521).** (A) snoRNA-derived miRNA candidate #3. (B) snoRNA-derived miRNA candidate #9. (C) tRNA-derived miRNA discussed in the main text. (D) endo-siRNA derived from inverted B4 SINEs.

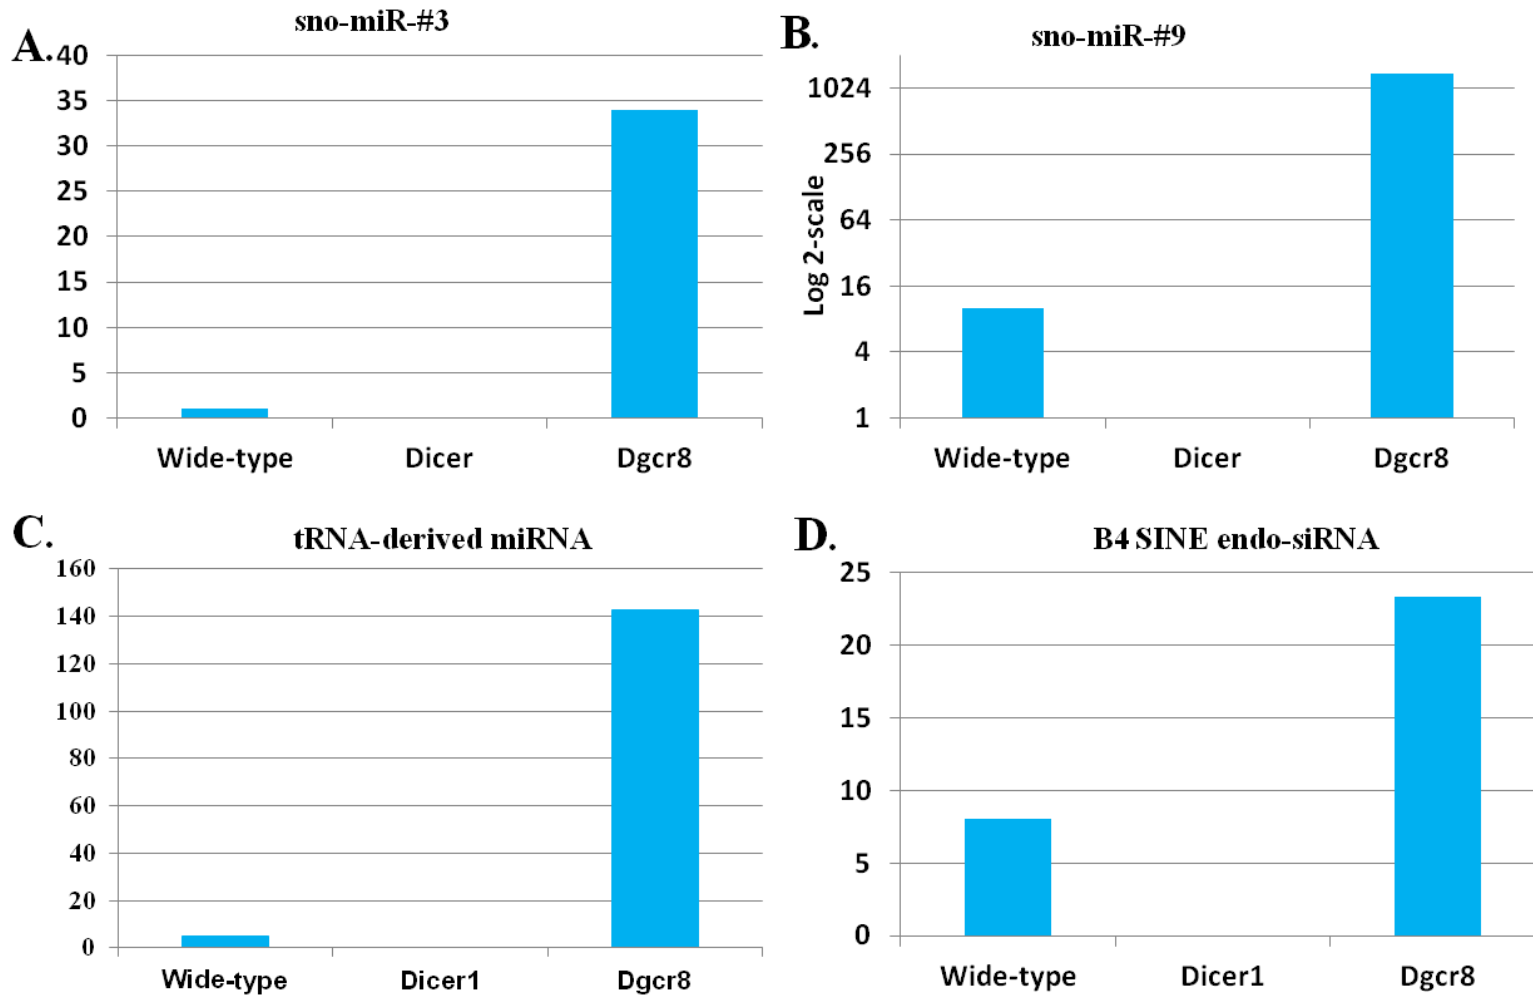

Supplement: pone.0047863.s002.pdf [file pone.0047863.s002.pdf]
