# Supplementary material for: Noncanonical MicroRNAs and Endogenous siRNAs in Lytic Infection of Murine Gammaherpesvirus
Source: PubMed Central journal article supplement (PMC3482243; doi:10.1371/journal.pone.0047863), 2012-10-26
Supplement: pone.0047863.s003.pdf [file pone.0047863.s003.pdf]

**Supplemental Figure S3. Sequence reads aligned to sno-miR-#3.** Reads corresponding to snoRNA fragments (in blue) appeared in both Dgcr8- and Dicer-knockout mice, while representative miRNA reads were found in Dgcr8- but not in Dicer-knockout mice.

sno-miR-#3

GACCUCUUGGGGAUCGCGUCUGGAGAGUAGCUAGUAUUCUCCAGCUUCGGAAGCAAGAGGGAGAGCAAGCCUAGCAGAGGUACCCAUUCCAUCCAGUUUGCUCGGUAGCUGGUGAUUGGAAGACACUCUGCAACAUA  
 .. ((((((((((((.....))))))))).....))))))..... ((((((((((((.....))))))))).....))))))..... (-49.00)

Reads in GSM314553 (Dicer-knockout mice)

Reads representing snoRNA fragments

|                              |    |    |   |
|------------------------------|----|----|---|
| GACCTCTGGGATCGCG.....        | 1  | 17 | 1 |
| GACCTCTGGGATCGCGTC.....      | 1  | 19 | 1 |
| GACCTCTGGGATCGCGTCTGGAG..... | 1  | 24 | 1 |
| GACCTCTGGGATCGCGCTGGA.....   | 1  | 23 | 1 |
| GACCTCTGGGATCGCGTCT.....     | 1  | 20 | 1 |
| GACCTCTGGGATCGCG.....        | 1  | 16 | 1 |
| GACCTCTGGGATCGCGT.....       | 3  | 18 | 1 |
| .....ATTGGAAGACTCTGCAACATTA  | 1  | 24 | 1 |
| .....AGACTCTGCAACATT.....    | 1  | 17 | 2 |
| .....AGACTCTGCAACATTA        | 7  | 18 | 1 |
| .....GACTCTGCAACATTA         | 8  | 17 | 1 |
| .....ACTCTGCAACATTA          | 22 | 16 | 4 |

Reads in GSM314557 (Dgcr8-knockout mice)

Reads representing snoRNA fragments

|                                 |    |    |   |
|---------------------------------|----|----|---|
| GACCTCTGGGATCGCG.....           | 1  | 17 | 1 |
| GACCTCTGGGATCGCGTCTGGAGAGT..... | 1  | 27 | 1 |
| GACCTCTGGGATCGCGTCTGGAG.....    | 1  | 24 | 1 |
| GACCTCTGGGATCGCG.....           | 4  | 16 | 1 |
| .....TTGGAAGACTCTGCAACAT.....   | 4  | 21 | 2 |
| .....AGACTCTGCAACATTA           | 4  | 18 | 1 |
| .....GACTCTGCAACATTA            | 11 | 17 | 1 |
| .....ACTCTGCAACATTA             | 46 | 16 | 4 |

Reads representing miRNAs derived from snoRNA

|                                      |    |    |   |
|--------------------------------------|----|----|---|
| .....CTAGCAGAGGTACCCATTCCATTCCC..... | 2  | 26 | 1 |
| .....TAGCAGAGGTACCCATTCCATTCCC.....  | 1  | 26 | 1 |
| .....TAGCAGAGGTACCCATTCCATTCC.....   | 1  | 24 | 1 |
| .....TAGCAGAGGTACCCATTCCATT.....     | 1  | 22 | 1 |
| .....TAGCAGAGGTACCCATTCCATTCCC.....  | 4  | 25 | 1 |
| .....TGTTGATTGGAAGACTCTGCA.....      | 1  | 23 | 3 |
| .....GTGATTGGAAGACTCTGCAAC.....      | 1  | 23 | 2 |
| .....GTGATTGGAAGACTCTGCAA.....       | 1  | 22 | 3 |
| .....TGATTGGAAGACTCTGCA.....         | 2  | 21 | 3 |
| .....TGATTGGAAGACTCTGCAA.....        | 13 | 21 | 3 |
| .....TGATTGGAAGACTCTGCAACA.....      | 32 | 23 | 2 |
| .....TGATTGGAAGACTCTGCAACAT.....     | 3  | 24 | 2 |
| .....TGATTGGAAGACTCTGCA.....         | 3  | 20 | 3 |
| .....TGATTGGAAGACTCTGCAAC.....       | 5  | 22 | 2 |
