# Supplementary material for: Noncanonical MicroRNAs and Endogenous siRNAs in Lytic Infection of Murine Gammaherpesvirus
Source: PubMed Central journal article supplement (PMC3482243; doi:10.1371/journal.pone.0047863), 2012-10-26

**Supplemental Figure S4. Examples of known and novel snoRNA-derived miRNAs bearing atypical folding structures.** (A) Folding structure of snoRNA HBI-100 carrying an annotated miRNA, mmu-miR-1843 with 4.5 unpaired bases in the central bulge, indicated inside the red ellipsis. (B) Folding structure of SNORA1 carrying novel sno-miR-#9 with 5 unpaired bases in the central bulges.

**A.** mmu-miR-1843/ snoRNA HBI-100

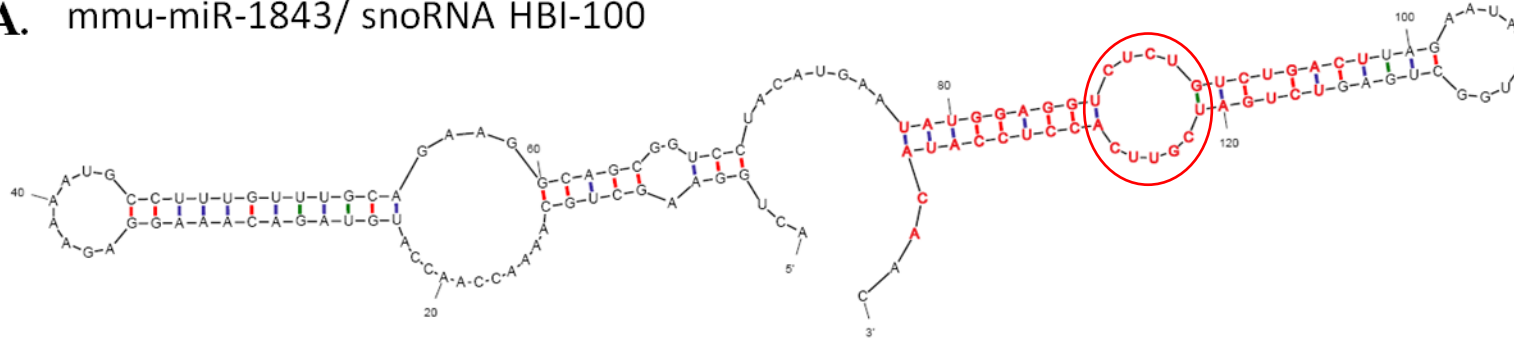

**B.** sno-miR-#9

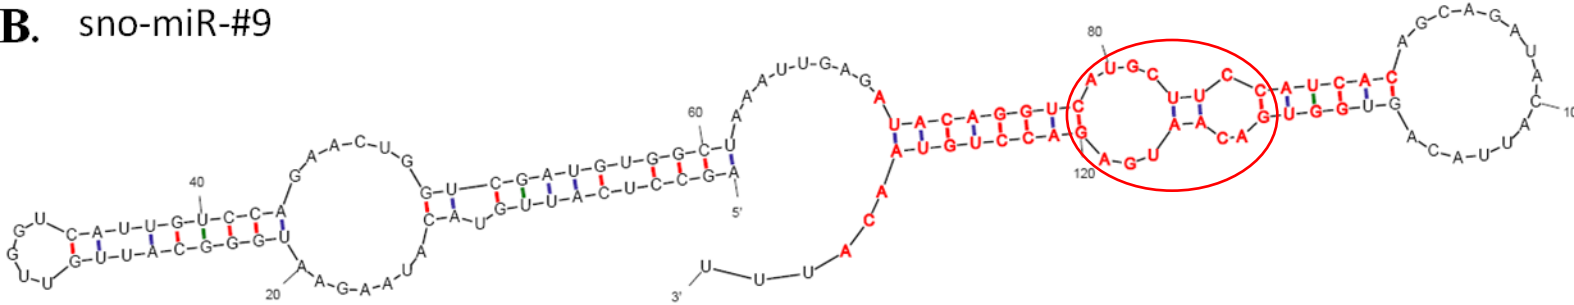

Supplement: pone.0047863.s004.pdf [file pone.0047863.s004.pdf]
