# Supplementary material for: Noncanonical MicroRNAs and Endogenous siRNAs in Lytic Infection of Murine Gammaherpesvirus
Source: PubMed Central journal article supplement (PMC3482243; doi:10.1371/journal.pone.0047863), 2012-10-26

**Supplemental Figure S5. A murine miRNA derived from tRNA-SerAGA.** (A) Alignment of reads representing the tRNA fragments and miRNA sequences. The tRNA is annotated in blue with the putative Pol III transcription terminal signal (in orange). Untemplated reads derived from tRNA CCA addition end with blue characters, while miRNA reads are annotated in red. The arrows indicate the RNase P (left) and RNase Z (right) processing. (B) The tRNA folding structure (left) and the alternative miRNA hairpin structure (right) with the miRNA annotated in red, with folding energy being presented below each structure. (C) Multiple sequences alignments of tRNA-SerAGA sequence among eight mammalian species with the miRNA indicated in the red rectangle.

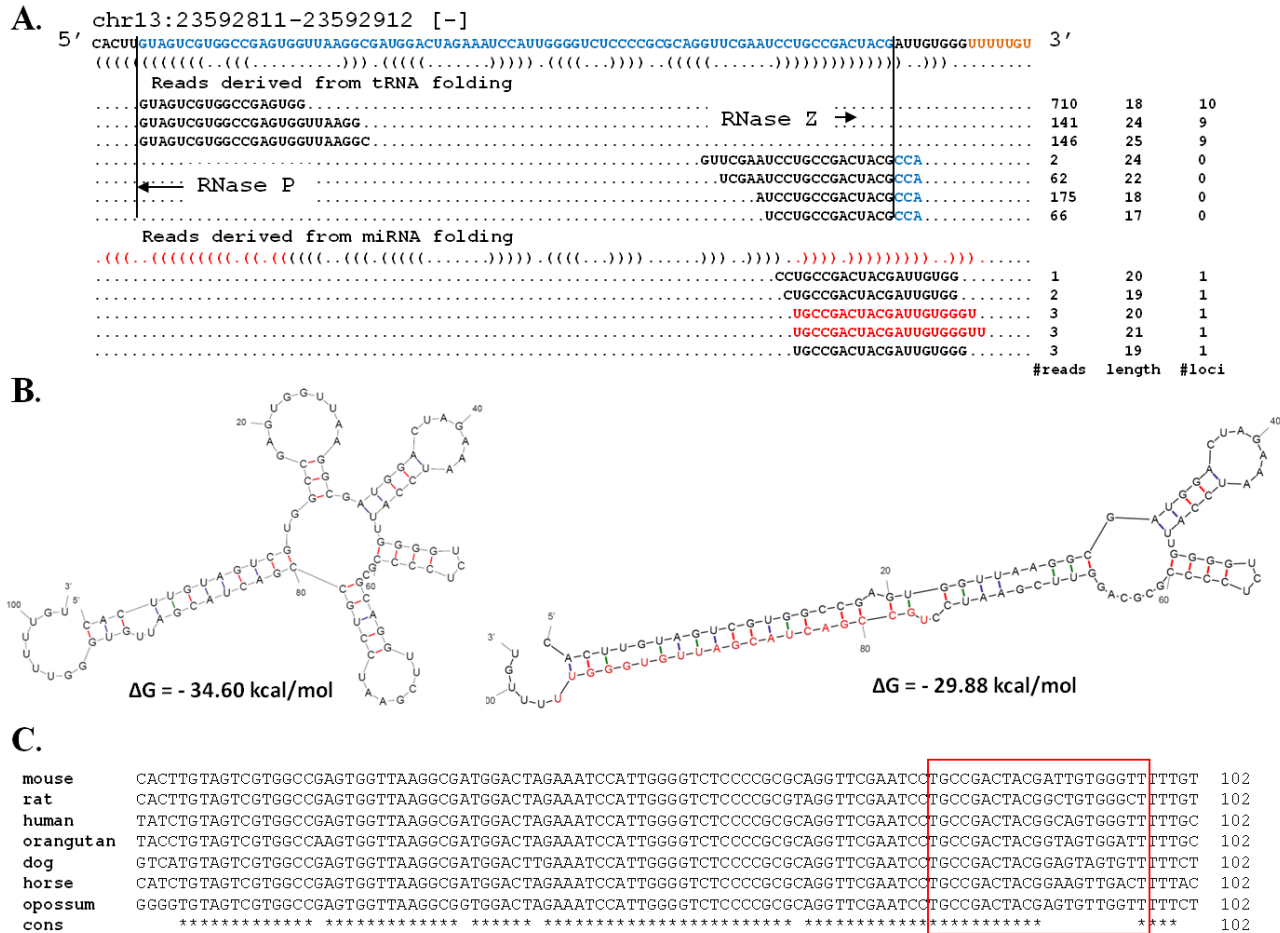

Supplement: pone.0047863.s005.pdf [file pone.0047863.s005.pdf]
