# Supplementary material for: Noncanonical MicroRNAs and Endogenous siRNAs in Lytic Infection of Murine Gammaherpesvirus
Source: PubMed Central journal article supplement (PMC3482243; doi:10.1371/journal.pone.0047863), 2012-10-26

**Supplemental Figure S7. Six of 17 previously annotated cis-NATs in the previous study<sup>24</sup> appeared in the current MHV68-infected data. All of the loci are based on UCSC mouse reference genome (version mm8). Mapping of reads and numbers of reads (log<sub>2</sub> based) in current data set (GSE36639) and in oocyte (GSM261957) are shown in the top two tracks. .RefSeq and Ensembl Gene annotations, repeat elements and conservation scores are shown (see UCSC genome browser for details of track information).**

1. chr14\_48088967\_48178294

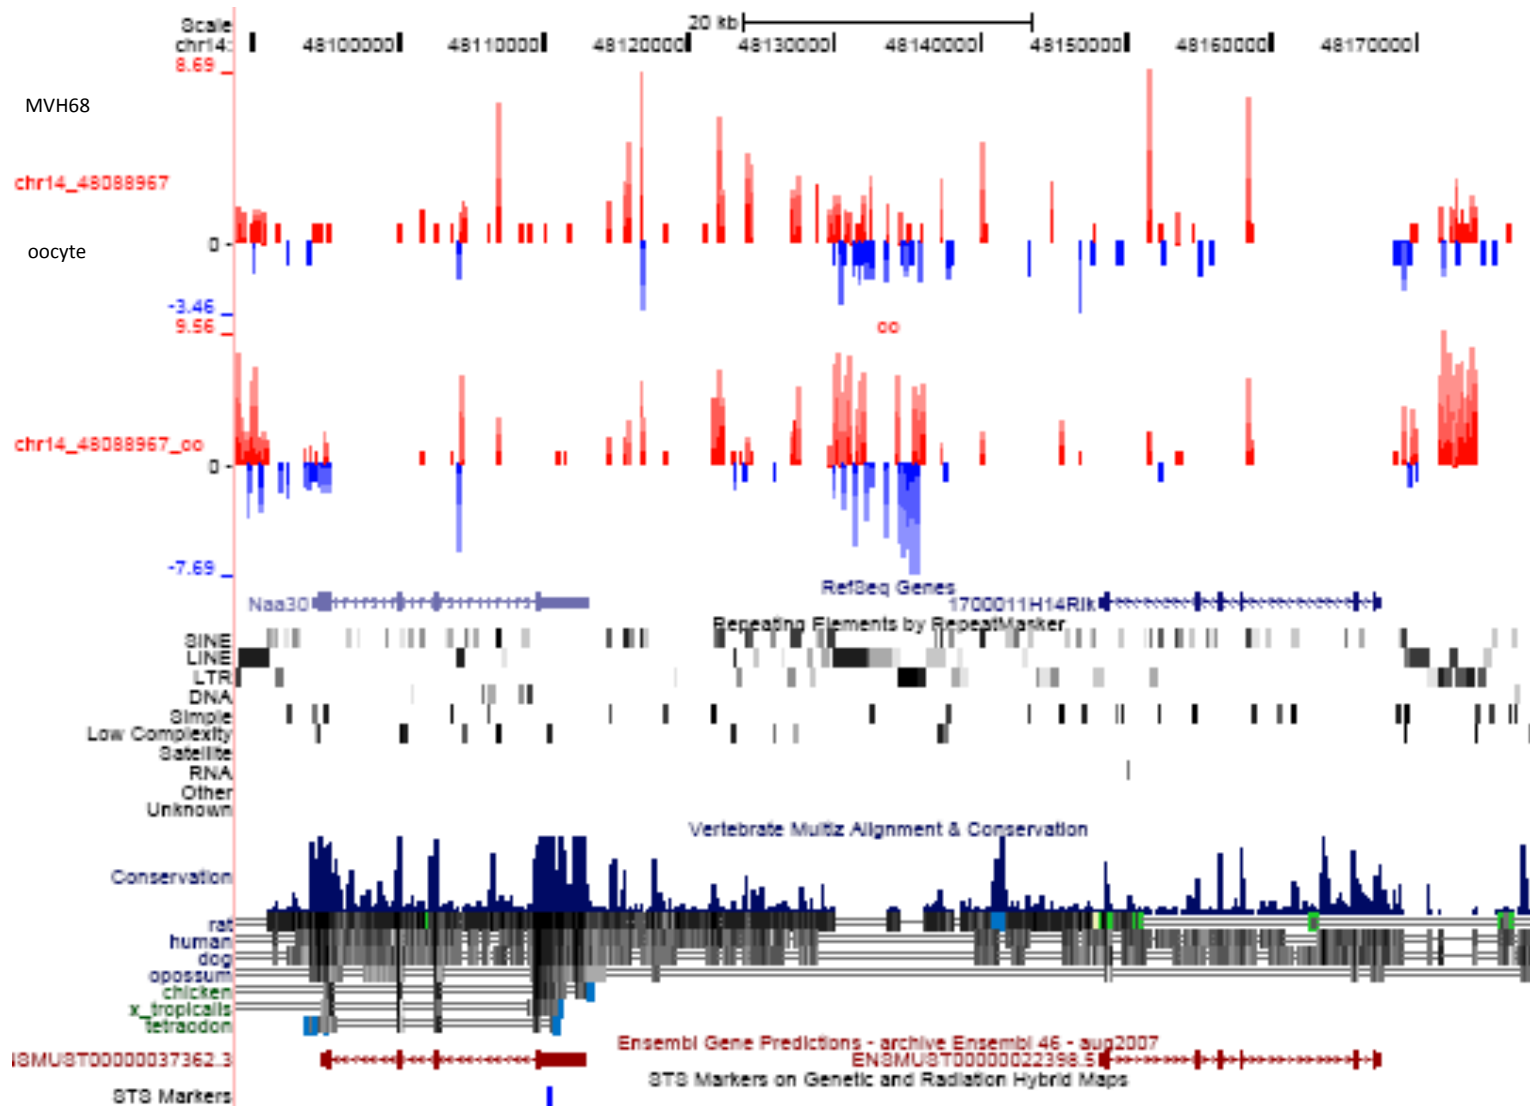

2. chr3\_103149689\_103158115

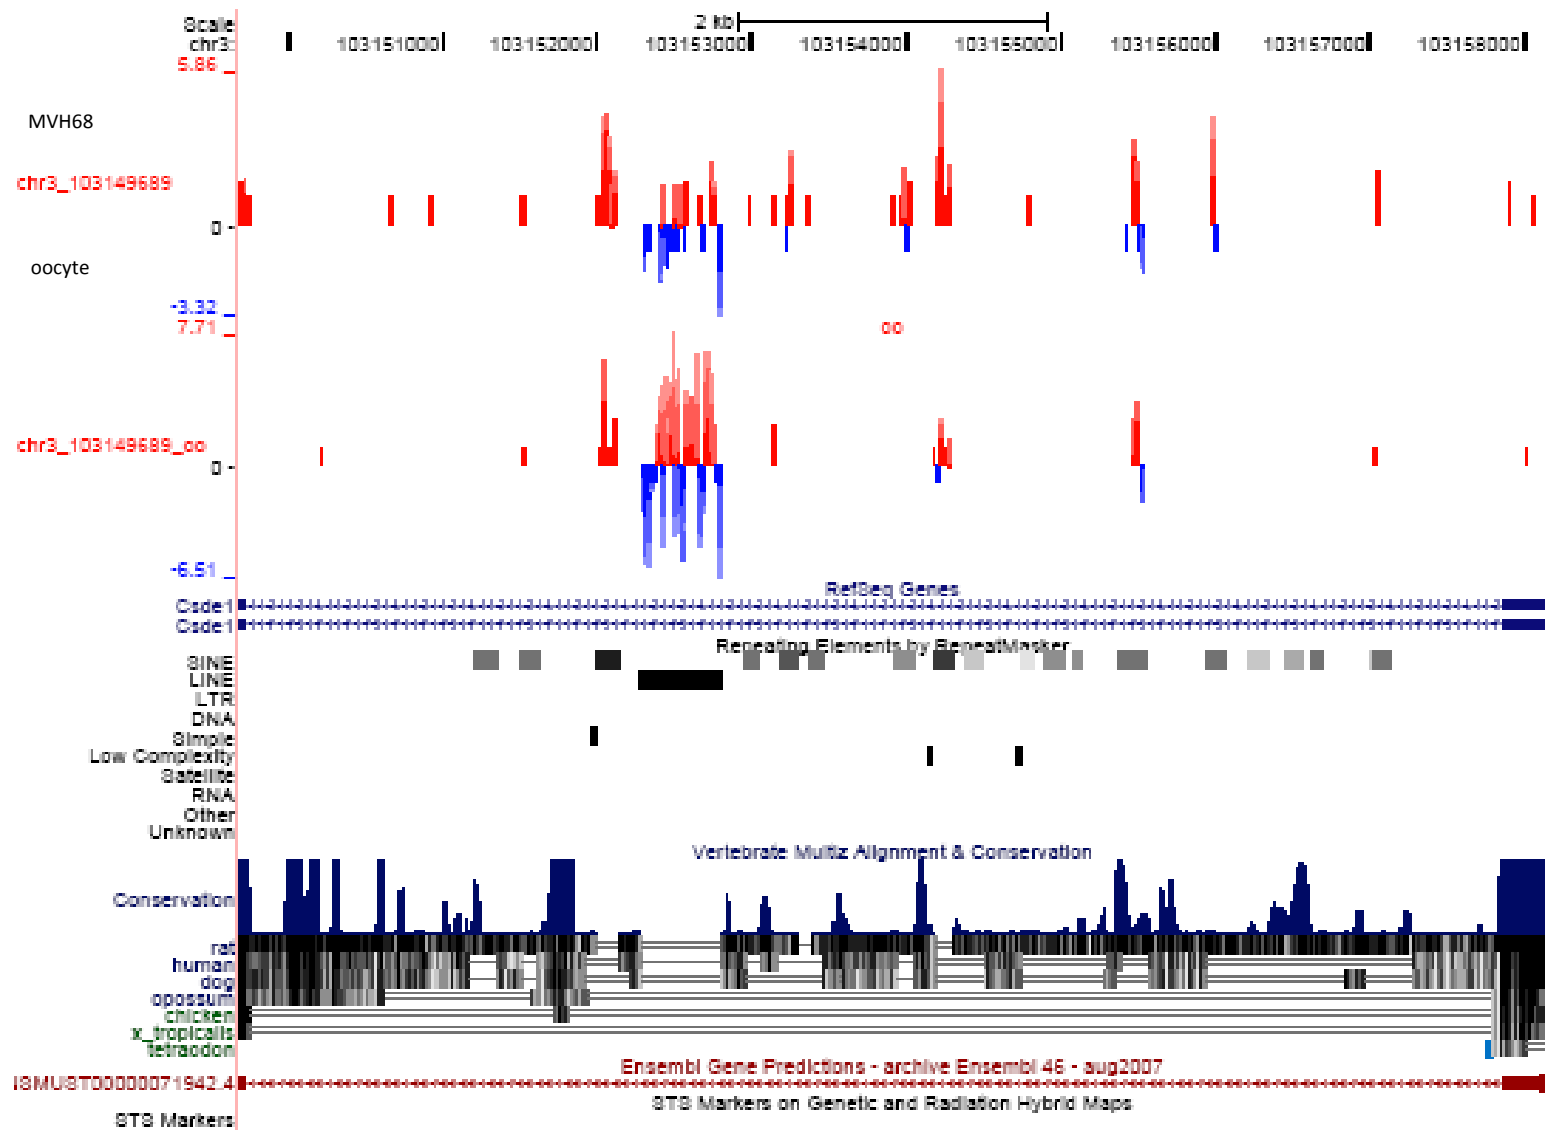

3. chr4:131168448-131195984

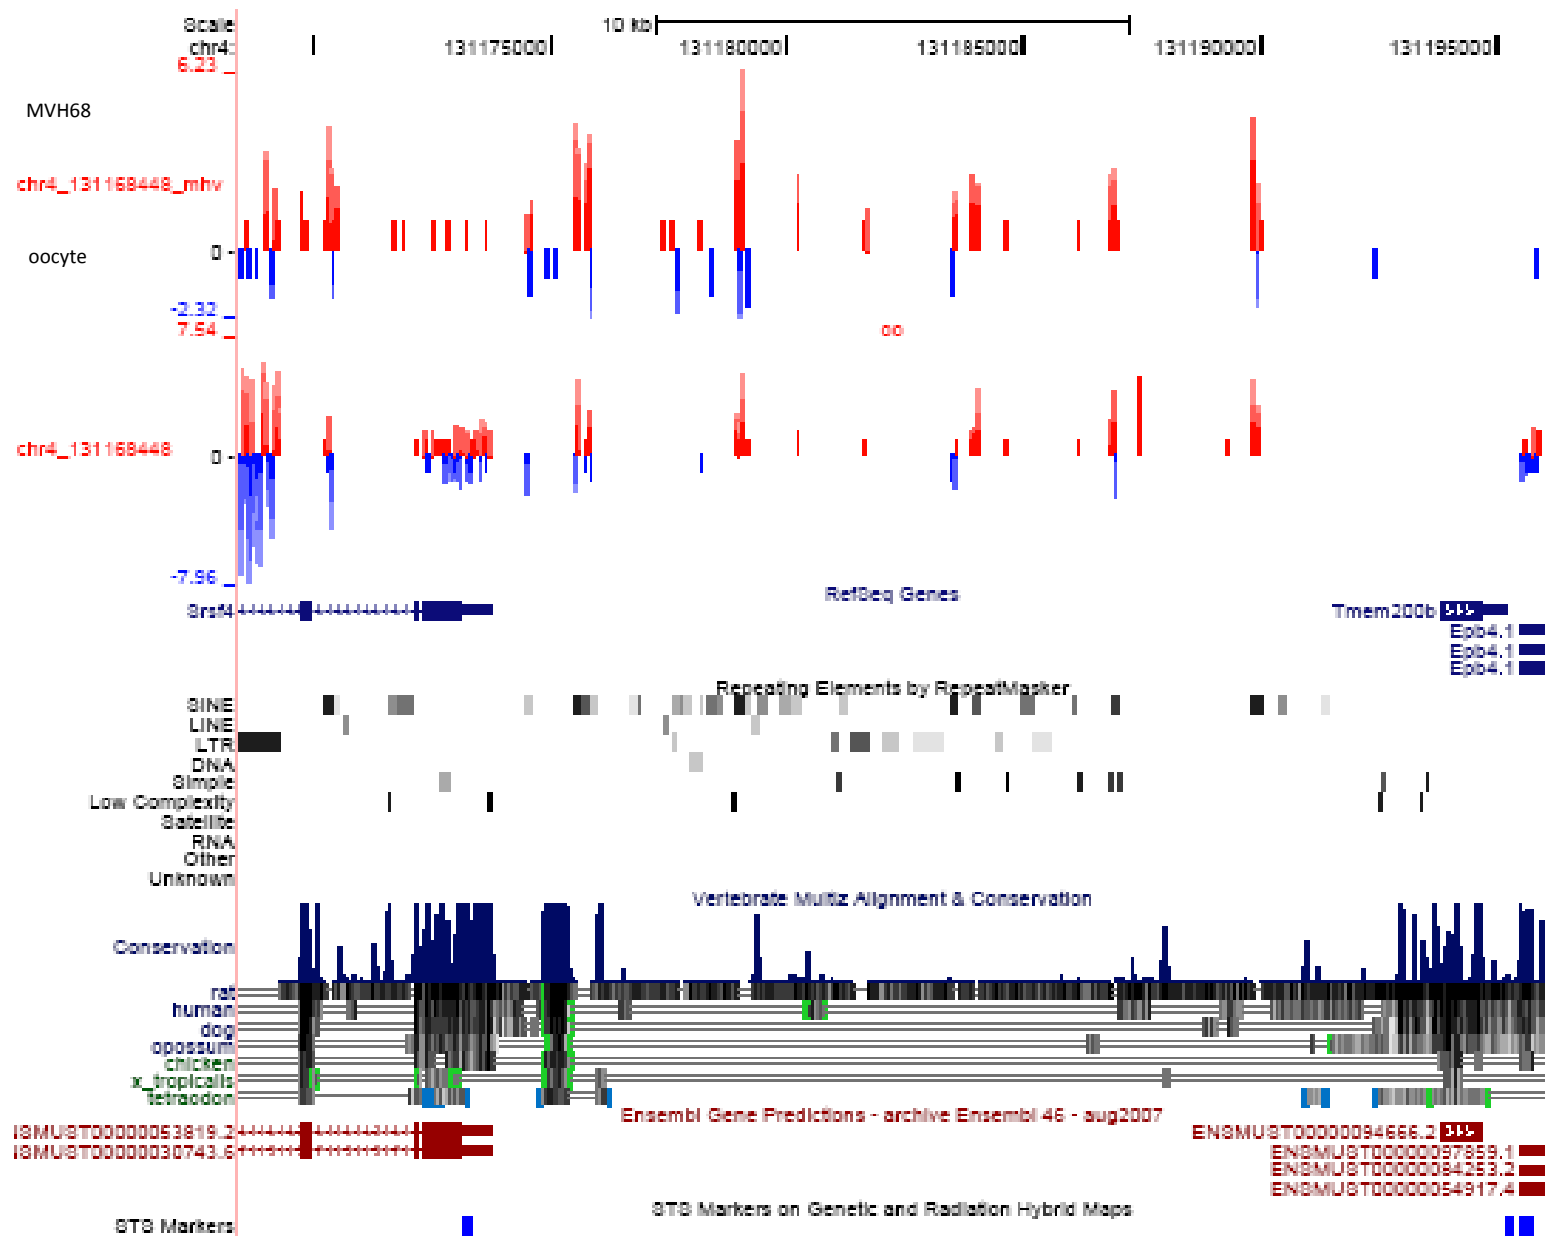

4. chr5\_114103753\_114204341

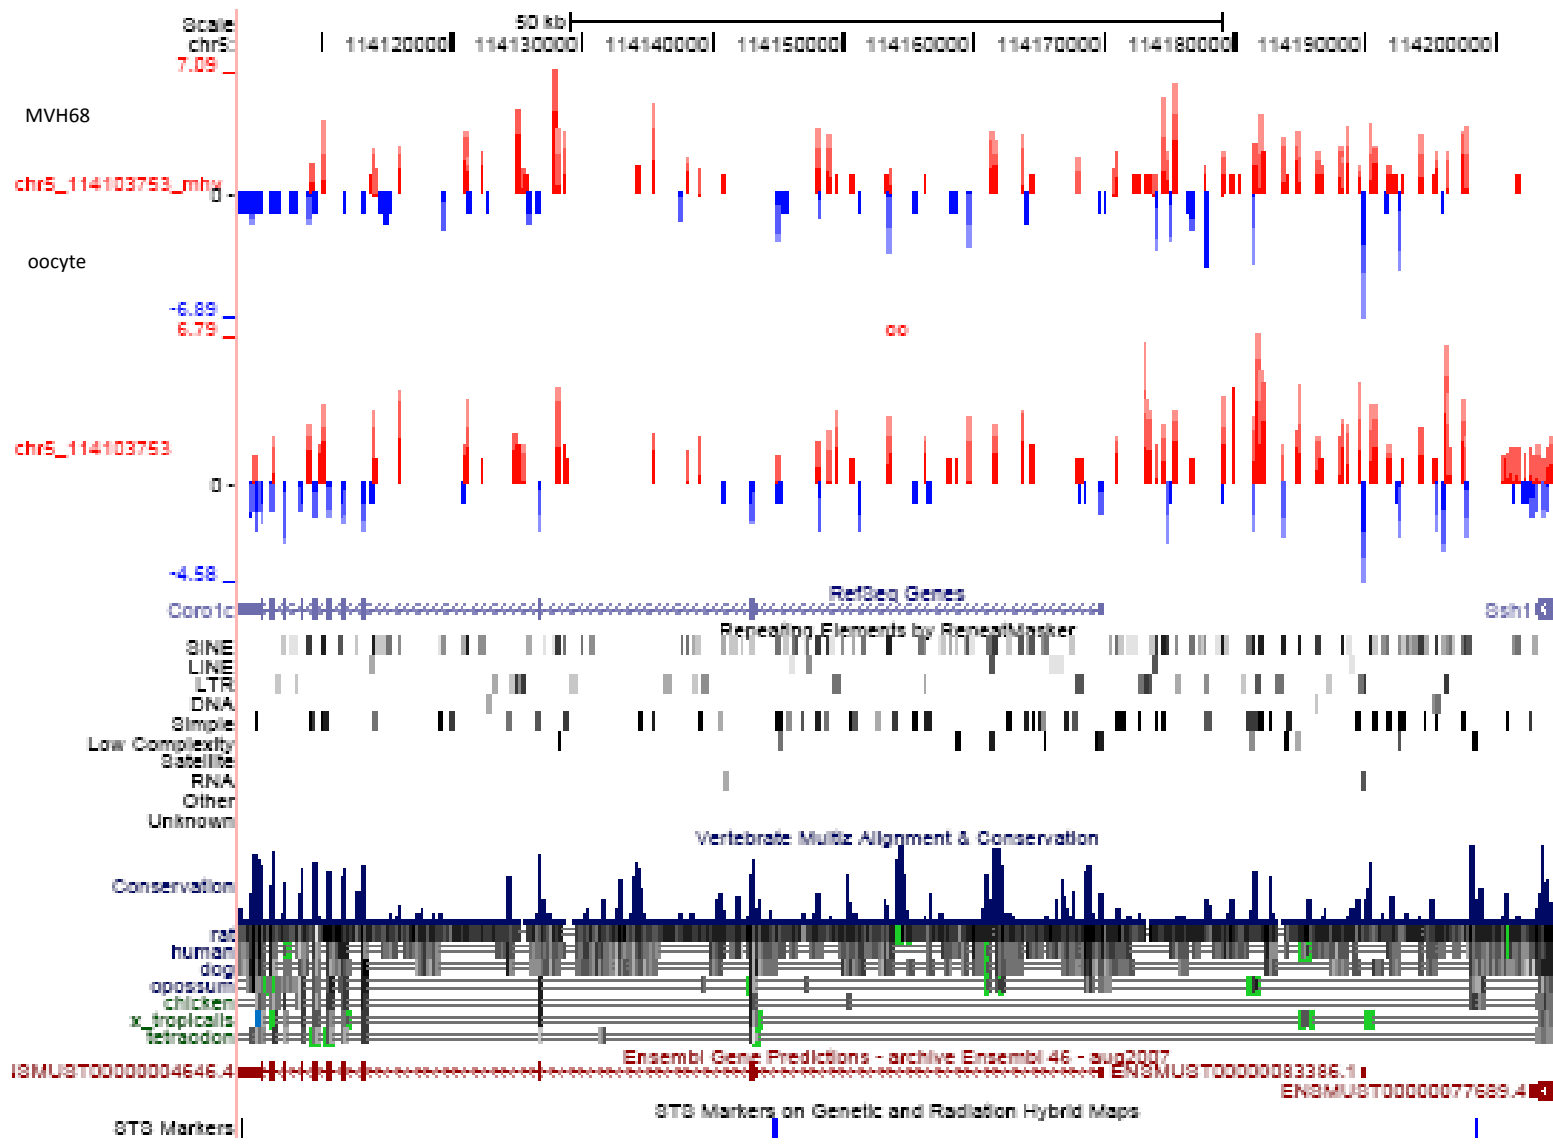

5. chr6\_95209508\_95276509

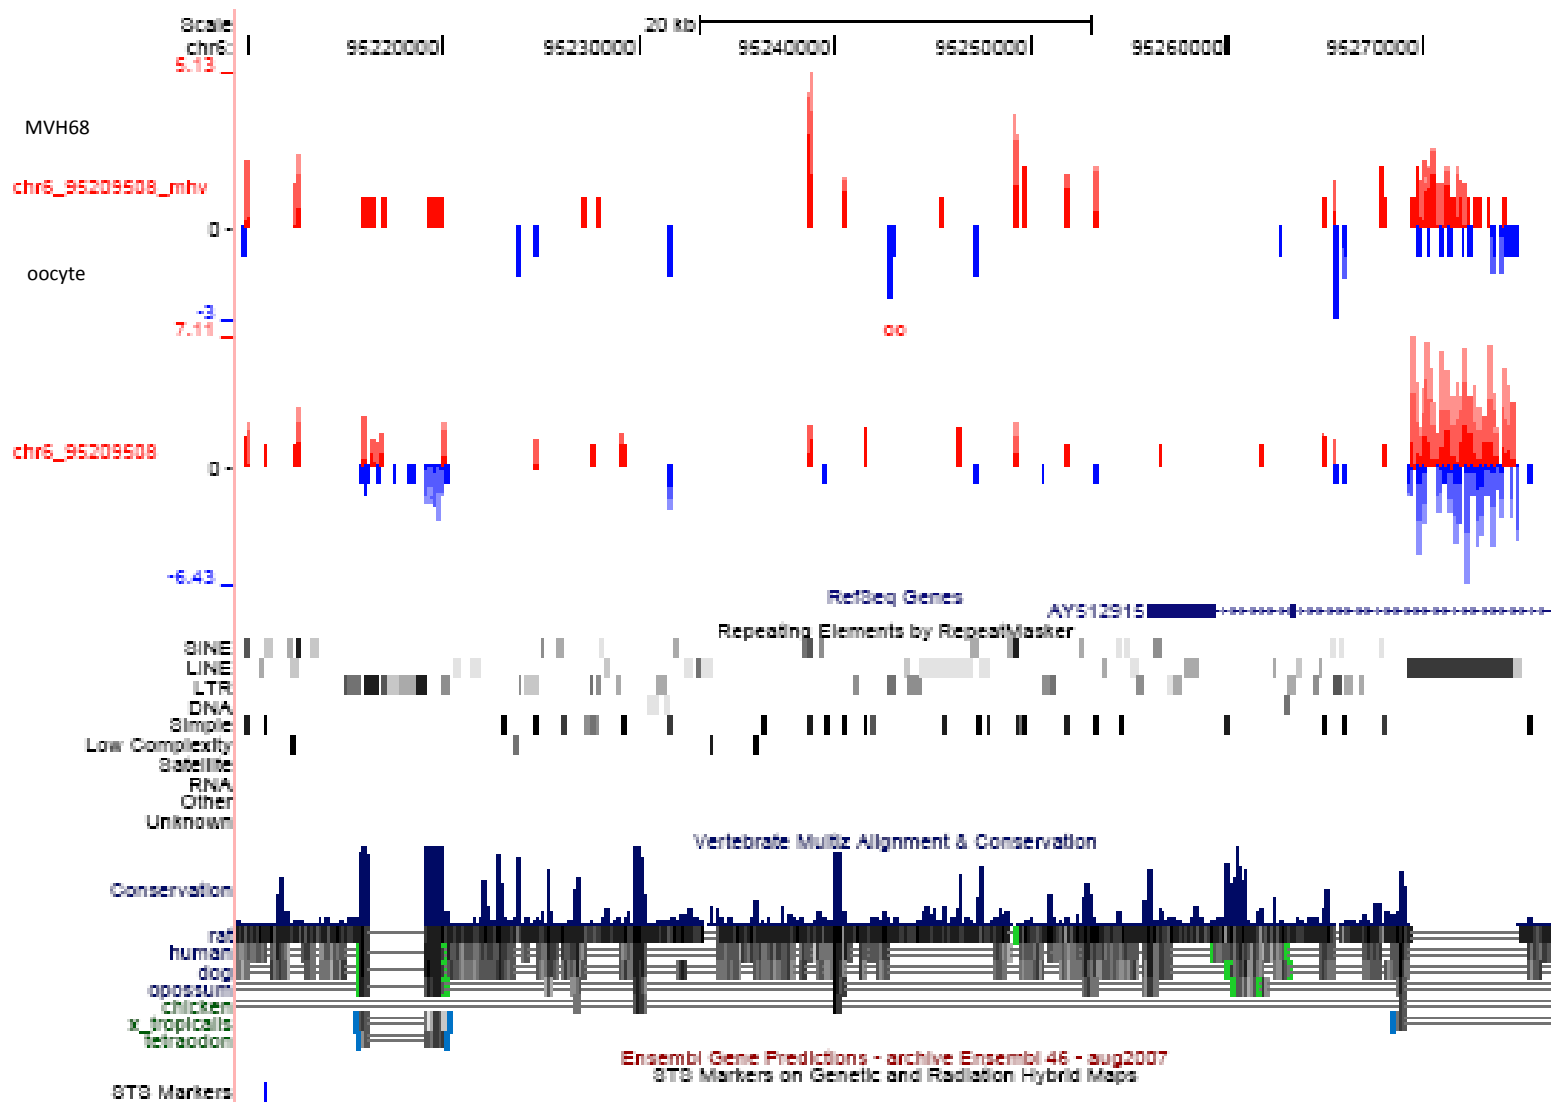

6. chr8\_126304234\_126307701

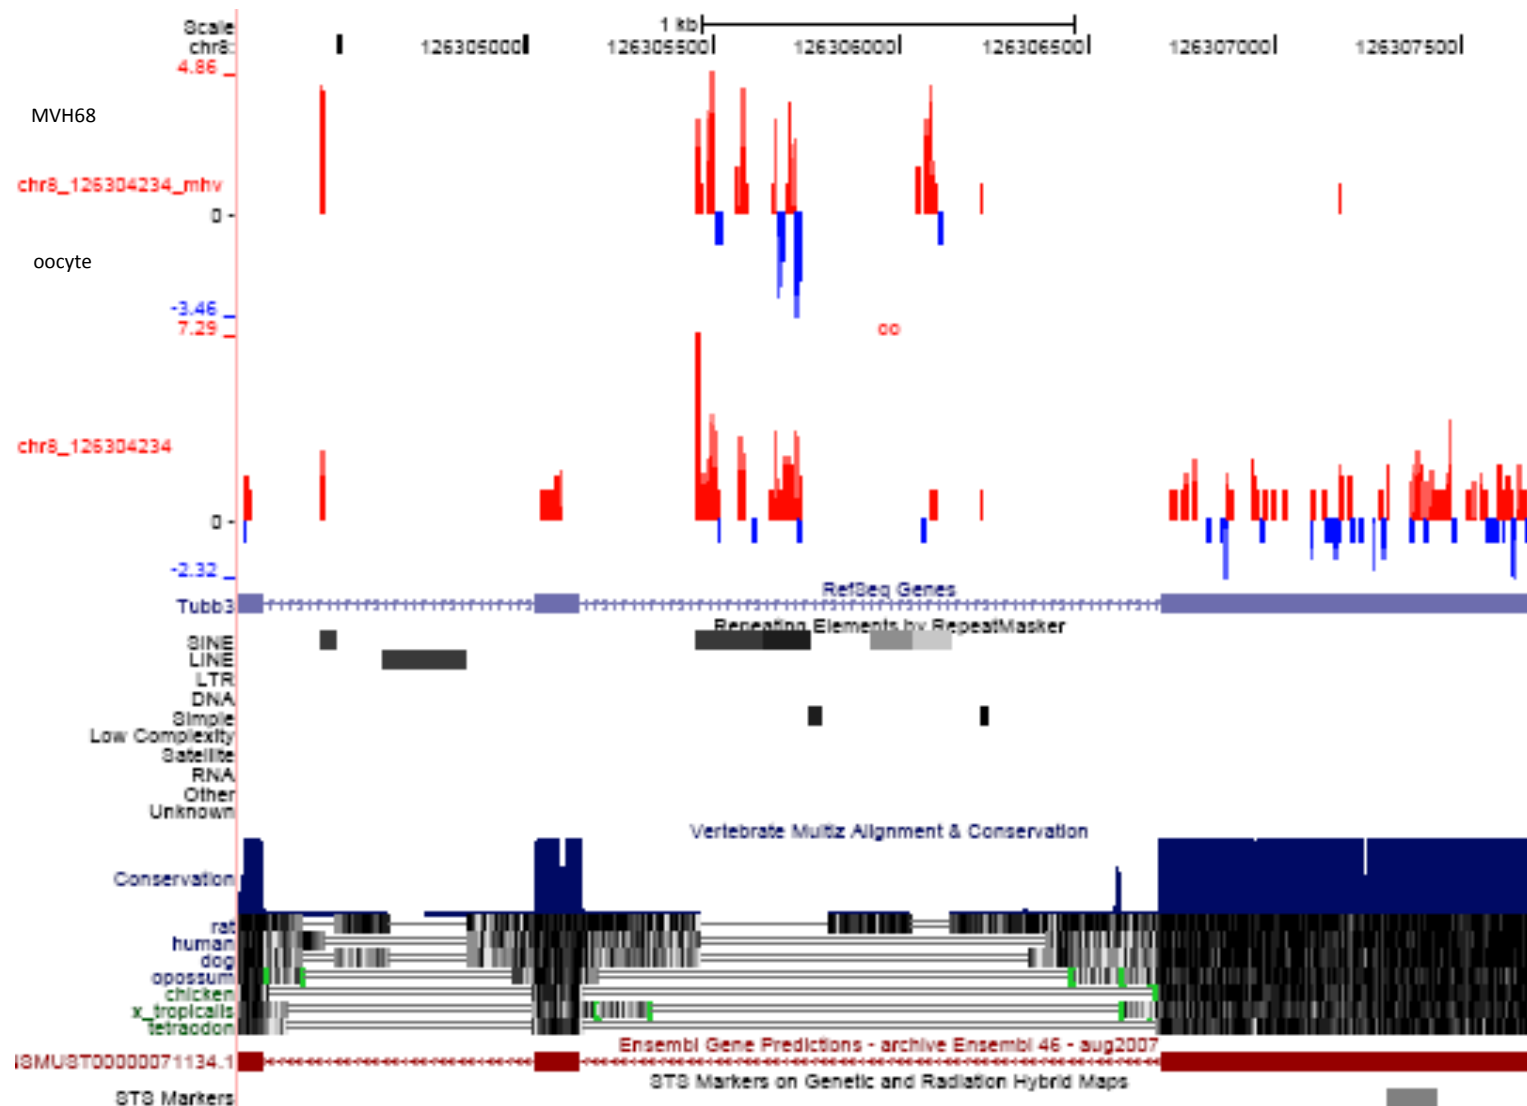

Supplement: pone.0047863.s007.pdf [file pone.0047863.s007.pdf]
