# Supplementary material for: Noncanonical MicroRNAs and Endogenous siRNAs in Lytic Infection of Murine Gammaherpesvirus
Source: PubMed Central journal article supplement (PMC3482243; doi:10.1371/journal.pone.0047863), 2012-10-26

**Supplemental Figure S8. The relationship between the copy number and the percentage of all genomic-aligned reads included**

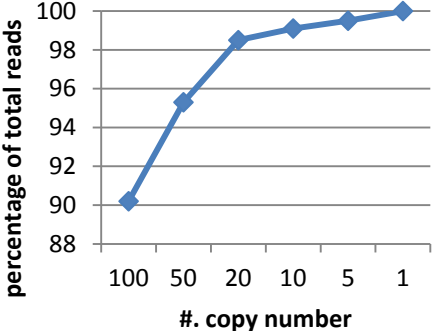

Supplement: pone.0047863.s008.pdf [file pone.0047863.s008.pdf]
