# Supplementary material for: Noncanonical MicroRNAs and Endogenous siRNAs in Lytic Infection of Murine Gammaherpesvirus
Source: PLoS One. 2012 Oct 26;7(10):e47863. doi: 10.1371/journal.pone.0047863 (PMC3482243; doi:10.1371/journal.pone.0047863)
Supplement: Table S3 — Twenty-eight novel miRNAs in the mouse genome represented by normalized reads from wide-type (wt), Dicer- (dicer) and Dgcr8-knockout (dgcr8) mice [12] . (XLSX) [file pone.0047863.s014.xlsx]

## Sheet: Table S3
Supplemental Table S3. Twenty-eight novel miRNAs in the mouse genome represented by normalized reads from wide-type (wt), Dicer- (dicer) and Dgcr8-knockout (dgcr8) mice.12
novel miRNA ID	type	wt	dicer	dgcr8
sno-miR-#1	noncanonical	1	0	23
sno-miR-#2	noncanonical	1	0	10
sno-miR-#3	noncanonical	1	0	34
sno-miR-#4	noncanonical	24	0	553
sno-miR-#5	noncanonical	2	0	80
sno-miR-#6	noncanonical	1	0	3
sno-miR-#7	noncanonical	2	0	10
sno-miR-#8	noncanonical	2	0	21
sno-miR-#9	noncanonical	10	0	1398
tRNA-miR-#1	noncanonical	5	0	143
miRtron-#1	noncanonical	0	0	23
miRtron-#2	noncanonical	4	0	31
miRtron-#3	noncanonical	1	0	34
miRtron-#4	noncanonical	0	0	29
miRtron-#5	noncanonical	3	0	10
miRtron-#6	noncanonical	1	0	16
miRtron-#7	noncanonical	0	0	10
miRtron-#8	noncanonical	4	0	36
miRtron-#9	noncanonical	2	0	18
miRtron-#10	noncanonical	1	0	13
miRtron-#11	noncanonical	0	0	5
miRtron-#12	noncanonical	2	0	16
miRtron-#13	noncanonical	0	0	18
miRtron-#14	noncanonical	1	0	52
miRtron-#15	noncanonical	1	0	34
cand-miR-#1	canonical	12	0	0
cand-miR-#2	canonical	9	0	0
cand-miR-#3	canonical	22	0	0
