# Supplementary material for: Noncanonical MicroRNAs and Endogenous siRNAs in Lytic Infection of Murine Gammaherpesvirus
Source: PLoS One. 2012 Oct 26;7(10):e47863. doi: 10.1371/journal.pone.0047863 (PMC3482243; doi:10.1371/journal.pone.0047863)
Supplement: Table S5 — A set of miRNA candidates identified in the mouse genome (build mm9). The columns of # reads represent the number of reads in all samples perfectly mapping to mature miRNA and hairpin sequences, respectively. The column of location indicates the names of host genes overlapping with miRNAs. (XLSX) [file pone.0047863.s016.xlsx]

## Sheet: Table S5
Supplemental Table S5. A set of miRNA candidates identified in the mouse genome (build mm9). The columns of # reads represent the number of reads in all samples perfectly mapping to mature miRNA and hairpin sequences, respectively. The column of location indicates the names of host genes overlapping with miRNAs.
miRNA ID	miRNA sequence	# reads	# reads	location	chrom	start	end	strand
		(miRNA)	(hairpin)
cand-miR-#1	AAGGCAAAUGGTAAACUGAACUG	50	64	Epb4.1l2 (intron)	chr10	25135799	25135869	+
cand-miR-#2	UCAAGUGUGACAAGAUCUCUAC	12	23	Ddx1 (intron)	chr12	13251844	13251960	-
cand-miR-#3	UUAGGAAUGCUAGGCUAGUGCU	17	17	intergenic	chr12	52836014	52836075	-
cand-miR-#4	ACAGCUAGUUCCUGAAUACAGU	28	32	LOC78521 (3'UTR)	chr13	55802888	55802980	+
cand-miR-#5	UCCUGAGAGAGAGAGAGGAAGU	44	69	Pvt1 (intron)	chr15	61983943	61984019	+
cand-miR-#6	AUACGCACACUUAAGACUUUAG	33	36	Ptprm (intron)	chr17	67375483	67375578	-
cand-miR-#7	AGGAGUGAGUGGUAAGCUGGUG	18	18	intergenic	chr19	41663176	41663247	+
cand-miR-#8	CCUAUAUAUAGGACUUUGGGCG	71	123	intergenic	chr19	59544717	59544813	+
cand-miR-#9	UGAUGCUCGGACCACAUGUGU	75	130	Adra1d (intron)	chr2	131384540	131384639	-
cand-miR-#10	UAACUGAACUGUGGUCCUCUGC	16	19	Ythdf1 (intron)	chr2	180652775	180652857	-
cand-miR-#11	UCUGUCAUUUUUCCCACCUAA	45	47	Wdr77 (3'UTR)	chr3	105770914	105770987	+
cand-miR-#12	UGGGAACAUCUACAAAGUGAAGU	21	30	Impad1 (intron)	chr4	4707329	4707425	-
cand-miR-#13	UAUGAGUUCUAGGCAUUGAAUCUG	26	10	Fam53a (intron)	chr5	33960723	33960819	-
cand-miR-#14	CCUGGAUGAUGUAGCACUGACU	32	35	Slit2 (intron)	chr5	48564343	48564464	+
cand-miR-#15	UUUGAGAGAAAUGUUUGGGCUC	57	74	Mthfd2l (intron)	chr5	91398075	91398184	+
cand-miR-#16	UAGUGCUGAGGAUUGACCUAGA	62	44	Zfp266 (3'UTR)	chr9	20303284	20303356	-
cand-miR-#17	UAGAGGAUAGAGGUAGAGAGUGG	34	46	Elof1 (intron)	chr9	21918386	21918461	-
cand-miR-#18	UACGUACACACUCGGACGCAC	16	68	Mto1 (intron)	chr9	78310474	78310576	+
cand-miR-#19	UUUGACUGAGAGGUAAGGAAUG	25	27	Klhl15 (3'UTR)	chrX	91519894	91519992	+
