# Supplementary material for: Noncanonical MicroRNAs and Endogenous siRNAs in Lytic Infection of Murine Gammaherpesvirus
Source: PLoS One. 2012 Oct 26;7(10):e47863. doi: 10.1371/journal.pone.0047863 (PMC3482243; doi:10.1371/journal.pone.0047863)
Supplement: Table S7 — MHV68 open reading frames targeted by MHV68 virus miRNAs. The number at the end of the miRNA name represents the digital counts of the miRNA and indicates the corresponding isoform. Annotation of MHV68 open reading frame can be downloaded from NCBI with accession number NC_001826.2. (XLSX) [file pone.0047863.s018.xlsx]

## Sheet: Table S7
Supplemental Table S7. MHV68 open reading frames targeted by MHV68 virus miRNAs. The number at the end of the miRNA name represents the digital counts of the miRNA and indicates the corresponding isoform. Annotation of MHV68 open reading frame can be downloaded from NCBI with accession number NC_001826.2
Target gene	. target sites	miRNA and isoform name	Score	Energy	miRNA start	miRNA end	target start	target end	Alignment score
O61	3	mghv-miR-M1-13_133	165	-19.72	2	18	226	248	0.75
		mghv-miR-M1-14-5p_634	172	-23.81	2	21	845	866	0.7895
		mghv-miR-M1-14-5p_94	167	-24.98	2	20	845	865	0.7778
O50	2	mghv-miR-M1-2-5p_590	164	-27.64	2	19	1606	1626	0.8235
		mghv-miR-M1-2-5p_9704	169	-26.84	2	20	1606	1627	0.8333
O68	4	mghv-miR-M1-10_122	160	-17.59	2	21	1077	1098	0.7368
		mghv-miR-M1-1*_18	161	-21.18	2	19	199	221	0.7778
		mghv-miR-M1-2-5p_5697	164	-25.94	2	23	253	275	0.7143
		mghv-miR-M1-6_852	163	-20.16	2	20	1265	1287	0.6667
M4	1	mghv-miR-M1-2-5p_110	163	-19.61	2	20	1213	1233	0.7778
M3	2	mghv-miR-M1-7-5p_16	164	-22.57	2	22	623	647	0.7619
		mghv-miR-M1-8_1864	166	-27.18	2	20	1055	1077	0.7368
M6	1	mghv-miR-M1-2-5p_5697	172	-30.39	2	17	41	64	0.8667
O75a	6	mghv-miR-M1-13-5p_2701	163	-27.34	2	16	545	566	0.8571
		mghv-miR-M1-14-5p_94	162	-23.02	2	19	1679	1699	0.7647
		mghv-miR-M1-6_852	168	-21.47	2	22	3170	3194	0.7273
		mghv-miR-M1-8_1482	170	-29.44	2	20	1874	1897	0.7368
		mghv-miR-M1-8_1864	160	-28.32	2	18	1873	1895	0.7059
		mghv-miR-M1-8_33513	165	-32.14	2	19	1873	1896	0.7222
M7	1	mghv-miR-M1-2-5p_5697	162	-22.85	2	23	443	464	0.7143
O40	1	mghv-miR-M1-14-5p_734	166	-21.47	2	19	660	683	0.7059
O19	1	mghv-miR-M1-1*_18	160	-23.32	2	17	1508	1529	0.8
O6	2	mghv-miR-M1-12_85	161	-16.54	2	18	614	637	0.75
		mghv-miR-M1-7-3p_86	164	-18.26	2	22	2795	2818	0.7619
O75b	1	mghv-miR-M1-8_1864	160	-24.84	2	18	2950	2972	0.7059
O58	1	mghv-miR-M1-13_133	164	-17.28	2	22	263	287	0.7273
O55	3	mghv-miR-M1-8-AS-5p_8	167	-27.9	2	21	494	517	0.7619
		mghv-miR-M1-8_1482	160	-35.86	3	22	495	518	0.8
		mghv-miR-M1-8_33513	180	-35.04	2	22	494	517	0.8095
M2	9	mghv-miR-M1-13-5p_2701	200	-46.36	2	21	840	861	1
		mghv-miR-M1-13_133	205	-39.71	2	22	801	823	1
		mghv-miR-M1-2-5p_6528	161	-33.92	2	19	1225	1248	0.8333
		mghv-miR-M1-8-AS-5p_8	175	-30.68	2	21	774	796	0.85
		mghv-miR-M1-8*_129	200	-40.41	2	21	738	759	1
		mghv-miR-M1-8_1482	205	-51.52	2	22	775	797	1
		mghv-miR-M1-8_1864	200	-48.91	2	21	774	795	1
		mghv-miR-M1-8_254	210	-52.99	2	23	775	798	1
		mghv-miR-M1-8_33513	205	-52.73	2	22	774	796	1
M5	1	mghv-miR-M1-2-5p_5697	172	-30.39	2	17	417	440	0.8667
O25	1	mghv-miR-M1-9_57	164	-23.6	2	21	2093	2111	0.7895
O73	2	mghv-miR-M1-2-5p_5697	168	-32.07	2	22	339	363	0.7619
		mghv-miR-M1-2-5p_6528	168	-31.74	2	22	341	364	0.7619
O21	3	mghv-miR-M1-14-5p_734	164	-28.66	2	23	605	627	0.7143
		mghv-miR-M1-7-5p_16	163	-25.59	2	20	1079	1102	0.7778
		mghv-miR-M1-8_1864	162	-31.91	3	20	651	673	0.8889
K3	1	mghv-miR-M1-8_1482	171	-24.41	2	21	177	200	0.7
O64	3	mghv-miR-M1-2-5p_6528	161	-28.84	2	21	5721	5748	0.75
		mghv-miR-M1-7-3p_86	161	-25.45	2	22	5547	5569	0.7
		mghv-miR-M1-8_1864	165	-33.17	2	18	1888	1909	0.75
O29a	1	mghv-miR-M1-6_852	164	-22.12	2	18	33	56	0.8235
O43	1	mghv-miR-M1-9-5p_18	162	-18.06	2	22	359	379	0.75
O17	2	mghv-miR-M1-2-5p_5697	166	-32.63	2	23	1366	1389	0.7143
		mghv-miR-M1-2-5p_9704	161	-33.12	2	22	1366	1388	0.7
O35	1	mghv-miR-M1-6_852	167	-22.51	2	20	101	123	0.7222
O7	1	mghv-miR-M1-14_106	167	-23.33	2	21	265	287	0.75
