# Supplementary material for: Noncanonical MicroRNAs and Endogenous siRNAs in Lytic Infection of Murine Gammaherpesvirus
Source: PLoS One. 2012 Oct 26;7(10):e47863. doi: 10.1371/journal.pone.0047863 (PMC3482243; doi:10.1371/journal.pone.0047863)
Supplement: Table S8 — List of genes in mouse genome targeted by MHV68 virus miRNAs. (XLSX) [file pone.0047863.s019.xlsx]

## Sheet: Table S8
Supplemental Table S8. List of genes in mouse genome targeted by MHV68 virus miRNAs.
Target gene	Gene symbol	# target sites	miRNA and isoforms	miRanda Score	Energy	miRNA start	miRNA end	target start	target end	Alignment score
0610007C21Rik	NM_027855	1	mghv-miR-M1-3_x1229	160	-21.11	2	17	4	26	0.8
0610007P08Rik	NM_001013608	1	mghv-miR-M1-13-5p_x2701	160	-20.49	2	18	330	352	0.7647
0610010B08Rik	NM_001177543	1	mghv-miR-M1-13_x133	161	-18.15	2	22	2504	2526	0.65
0610037L13Rik	NM_028754	1	mghv-miR-M1-2-5p_x590	163	-24.57	2	21	395	417	0.75
1110004E09Rik	NM_026502	1	mghv-miR-M1-9-5p_x18	164	-26.92	2	22	3	28	0.7391
1110017F19Rik	NM_001162998	1	mghv-miR-M1-1_x1342	166	-27.43	2	21	152	176	0.7273
1110018G07Rik	NM_178065	1	mghv-miR-M1-3_x1229	160	-20.74	2	22	143	166	0.6667
1110021J02Rik	NM_026782	1	mghv-miR-M1-8_x33513	162	-21.72	2	22	426	446	0.75
1110028C15Rik	NM_001122738	1	mghv-miR-M1-5*_x390	162	-15.42	2	19	210	231	0.7647
1110032A03Rik	NM_023483	1	mghv-miR-M1-6_x852	168	-18.12	2	22	421	444	0.7143
1110032F04Rik	NM_001167996	1	mghv-miR-M1-9_x57	162	-23.45	2	20	864	887	0.75
1110037F02Rik	NM_001081183	1	mghv-miR-M1-9_x57	160	-15.96	2	21	539	560	0.7368
1110038D17Rik	NM_175133	1	mghv-miR-M1-2-5p_x6528	161	-26.17	2	19	1239	1262	0.7778
1110038F14Rik	NM_054099	2	mghv-miR-M1-2-5p_x6528	171	-31.89	2	22	13	34	0.75
			mghv-miR-M1-2-5p_x5697	167	-34.1	2	23	10	33	0.7273
1110054O05Rik	NM_001013577	1	mghv-miR-M1-2-5p_x9704	165	-25.86	2	19	2296	2319	0.8333
1110067D22Rik	NM_173752	1	mghv-miR-M1-9_x57	170	-20.81	2	21	2383	2403	0.8421
1190007F08Rik	NM_001163721	1	mghv-miR-M1-8-AS-3p_x2	171	-26.48	2	21	854	876	0.8
1200011I18Rik	NM_026177	1	mghv-miR-M1-1_x1342	162	-15.61	2	19	1924	1945	0.7647
1200014J11Rik	NM_025818	1	mghv-miR-M1-10-AS-5p_x1	162	-14.58	2	21	1624	1645	0.7895
1300018I17Rik	NM_028200	1	mghv-miR-M1-3_x1229	165	-24.03	2	18	98	120	0.75
1500002O20Rik	NM_028047	1	mghv-miR-M1-9_x57	160	-19.51	2	21	366	387	0.6316
1500009L16Rik	NM_001145198	1	mghv-miR-M1-5*_x390	160	-19.12	2	19	821	841	0.8235
1500010J02Rik	NM_001013256	1	mghv-miR-M1-8_x254	162	-27.59	2	23	176	199	0.6667
1600002H07Rik	NM_028056	2	mghv-miR-M1-2-5p_x6528	162	-29.6	2	20	118	141	0.6842
			mghv-miR-M1-2-5p_x5697	160	-35.83	2	23	115	140	0.6087
1600012H06Rik	NM_001083880	2	mghv-miR-M1-1_x1342	162	-20.51	2	21	750	770	0.7368
			mghv-miR-M1-3-5p_x176	163	-25.74	2	21	407	425	0.8421
1600021P15Rik	NM_177718	1	mghv-miR-M1-2-5p_x5697	162	-28.08	2	23	1060	1083	0.619
1700011F14Rik	NM_029372	1	mghv-miR-M1-6_x852	165	-22.16	2	22	117	139	0.65
1700012A03Rik	NM_029587	1	mghv-miR-M1-8_x1864	161	-24.66	2	18	1	22	0.75
1700017B05Rik	NM_028820	1	mghv-miR-M1-14_x106	160	-18.99	2	19	1424	1444	0.8235
1700018C11Rik	NM_029324	1	mghv-miR-M1-13_x133	166	-25.08	2	21	44	65	0.7368
1700021K19Rik	NM_001200038	1	mghv-miR-M1-13-5p_x2701	178	-27.19	2	19	1121	1142	0.8235
1700025G04Rik	NM_197990	2	mghv-miR-M1-9-5p_x18	172	-25.22	2	21	2268	2290	0.7368
			mghv-miR-M1-12*_x10	174	-25.94	2	20	6924	6948	0.85
1700027A23Rik	NM_001200028	1	mghv-miR-M1-14-5p_x94	162	-23.64	2	19	31	51	0.7647
1700029F12Rik	NM_001080777	2	mghv-miR-M1-2-5p_x6528	161	-25.36	2	19	23	46	0.7778
			mghv-miR-M1-7-5p_x16	162	-21.88	2	20	177	201	0.7368
1700030J22Rik	NM_027103	1	mghv-miR-M1-8_x254	176	-31.17	2	22	463	487	0.8095
1700040L02Rik	NM_028491	1	mghv-miR-M1-1*_x18	163	-22.49	2	20	101	122	0.7778
1700047I17Rik2	NM_001100116	2	mghv-miR-M1-9-5p_x18	169	-17.85	2	22	1013	1035	0.7
			mghv-miR-M1-9-5p_x18	169	-17.85	2	22	1013	1035	0.7
1700049G17Rik	NM_028538	1	mghv-miR-M1-2-5p_x5697	162	-27.1	2	19	1202	1225	0.7647
1700054N08Rik	NM_028536	2	mghv-miR-M1-8*_x129	160	-22.6	2	19	136	156	0.8235
			mghv-miR-M1-10-5p_x78	162	-18.39	2	19	1257	1278	0.7647
1700065D16Rik	NM_028533	1	mghv-miR-M1-6_x852	160	-21.78	2	22	1371	1390	0.75
1700081L11Rik	NM_001081045	1	mghv-miR-M1-12*_x10	161	-23.9	2	16	458	479	0.9286
1700088E04Rik	NM_138581	1	mghv-miR-M1-14-5p_x94	164	-17.92	2	17	39	59	0.8667
1700094D03Rik	NM_028567	1	mghv-miR-M1-6_x852	162	-22.3	2	20	538	563	0.7143
1810008A18Rik	NM_133998	1	mghv-miR-M1-3_x1229	160	-22.92	2	22	1523	1546	0.7143
1810011O10Rik	NM_026931	1	mghv-miR-M1-8_x1864	162	-25.93	2	20	33	57	0.7619
1810012P15Rik	NM_001076681	3	mghv-miR-M1-4_x32	163	-28.45	2	21	559	581	0.7
			mghv-miR-M1-6*_x58	169	-25.08	2	21	130	151	0.85
			mghv-miR-M1-6*_x46	169	-27.77	2	21	129	150	0.85
1810013L24Rik	NM_001081400	2	mghv-miR-M1-3_x1229	167	-27.82	2	20	2192	2214	0.7222
			mghv-miR-M1-6*_x58	160	-22.74	2	13	2296	2317	1
1810014F10Rik	NM_026928	1	mghv-miR-M1-2-5p_x5697	169	-32.6	2	23	76	102	0.7083
1810041L15Rik	NM_001163145	5	mghv-miR-M1-8_x254	164	-28.49	2	23	999	1021	0.7143
			mghv-miR-M1-10-5p_x12	178	-27.03	2	20	2111	2132	0.8947
			mghv-miR-M1-10-5p_x78	178	-25.86	2	20	2109	2131	0.8947
			mghv-miR-M1-10-AS-5p_x1	170	-21.77	2	20	2108	2131	0.7895
			mghv-miR-M1-13-5p_x2701	160	-25.84	2	19	4720	4744	0.8
1810043G02Rik	NM_026431	1	mghv-miR-M1-7-5p_x16	161	-20.04	2	23	592	618	0.7083
1810046J19Rik	NM_025559	1	mghv-miR-M1-1_x1342	163	-19.91	2	21	137	159	0.75
1810063B07Rik	NM_026209	2	mghv-miR-M1-10-5p_x78	161	-20.33	2	21	211	232	0.8
			mghv-miR-M1-10-AS-5p_x1	165	-20.55	2	21	210	232	0.8
1810074P20Rik	NM_026194	4	mghv-miR-M1-2-5p_x6528	177	-32.41	2	22	68	90	0.8
			mghv-miR-M1-2-5p_x5697	172	-34.68	2	1900-01-21	66	89	0.7895
			mghv-miR-M1-2-5p_x9704	167	-31.25	2	20	66	88	0.7778
			mghv-miR-M1-2-5p_x590	162	-29.78	2	19	66	87	0.7647
2010002M12Rik	NM_053217	1	mghv-miR-M1-14-5p_x94	162	-20.52	2	19	421	441	0.7059
2010011I20Rik	NM_025912	1	mghv-miR-M1-14-5p_x94	166	-23.33	2	20	2726	2747	0.7895
2010012O05Rik	NM_025563	2	mghv-miR-M1-2-5p_x5697	162	-22.1	2	19	499	522	0.7647
			mghv-miR-M1-10_x122	160	-17.09	2	21	697	718	0.6316
2010106G01Rik	NM_023220	1	mghv-miR-M1-3_x1229	164	-25.13	2	22	1168	1191	0.7143
2010107G12Rik	NM_001025573	2	mghv-miR-M1-2_x4	162	-27.89	2	21	208	228	0.7895
			mghv-miR-M1-2-5p_x9704	166	-31.42	2	21	7	28	0.7895
2010109I03Rik	NM_025929	2	mghv-miR-M1-8_x1482	161	-27.28	2	14	1243	1265	0.9167
			mghv-miR-M1-14-5p_x94	167	-23.61	2	16	848	868	0.9286
2010109K11Rik	NM_001162903	1	mghv-miR-M1-6_x852	160	-13.99	2	22	1770	1793	0.619
2010300C02Rik	NM_028096	1	mghv-miR-M1-6_x852	163	-18.15	2	21	400	425	0.7273
2210012G02Rik	NM_025617	2	mghv-miR-M1-6_x852	160	-20.18	2	22	2031	2055	0.6364
			mghv-miR-M1-8_x1864	170	-28.66	2	21	2488	2508	0.8421
2210016F16Rik	NM_027335	1	mghv-miR-M1-6_x852	165	-20.3	2	21	47	67	0.7368
2210016L21Rik	NM_028211	1	mghv-miR-M1-6_x852	164	-23.28	2	22	56	77	0.8095
2210404O07Rik	NM_001099917	1	mghv-miR-M1-7-5p_x16	164	-22.03	2	19	125	147	0.8235
2210411K11Rik	NM_029384	1	mghv-miR-M1-8*_x129	171	-24.36	2	20	345	366	0.7778
2300003K06Rik	NM_001195383	1	mghv-miR-M1-10-5p_x78	165	-21.06	2	18	50	71	0.8125
2310004N24Rik	NM_027107	1	mghv-miR-M1-10-AS-3p_x3	161	-15.87	2	22	24	46	0.6
2310008H09Rik	NM_001168218	2	mghv-miR-M1-8_x33513	160	-32.7	2	22	2368	2397	0.6667
			mghv-miR-M1-10-AS-5p_x1	168	-18.44	2	22	2187	2210	0.7619
2310022A10Rik	NM_001122767	1	mghv-miR-M1-14_x106	162	-17.33	2	21	405	425	0.7895
2310022B05Rik	NM_175149	2	mghv-miR-M1-5*_x390	176	-31.66	2	21	1309	1330	0.8421
			mghv-miR-M1-14_x106	174	-22.75	2	19	1092	1113	0.8824
2310046O06Rik	NM_001166364	1	mghv-miR-M1-2-5p_x6528	161	-25.48	2	22	1080	1102	0.65
2310057N15Rik	NM_027170	1	mghv-miR-M1-10_x122	170	-21.08	2	20	132	154	0.7895
2400003C14Rik	NM_028018	1	mghv-miR-M1-12*_x10	167	-24.21	2	16	341	363	0.9286
2410001C21Rik	NM_025542	2	mghv-miR-M1-8_x254	175	-28.72	2	22	636	658	0.8
			mghv-miR-M1-8_x1482	170	-29.52	2	21	636	657	0.7895
2410004P03Rik	NM_001201332	2	mghv-miR-M1-6_x852	164	-24.07	2	21	8	30	0.6842
			mghv-miR-M1-14-5p_x94	163	-18.93	2	20	272	292	0.7222
2410012M07Rik	NM_028033	1	mghv-miR-M1-13-5p_x2701	175	-26.06	2	20	85	106	0.8333
2410017P09Rik	NM_001204912	1	mghv-miR-M1-14_x106	160	-22.73	2	21	2925	2944	0.7895
2410066E13Rik	NM_026629	1	mghv-miR-M1-8_x33513	164	-26.07	2	17	921	943	0.7333
2510009E07Rik	NM_001001881	1	mghv-miR-M1-12_x85	162	-23.38	2	18	1675	1696	0.875
2510039O18Rik	NM_029841	1	mghv-miR-M1-7-5p_x16	166	-22.34	2	23	381	404	0.619
2610002I17Rik	NM_001081381	1	mghv-miR-M1-3_x1229	162	-22.11	2	20	226	249	0.7368
2610019F03Rik	NM_173744	2	mghv-miR-M1-4_x56	160	-19.02	2	21	1005	1025	0.7895
			mghv-miR-M1-8_x254	161	-24.71	2	22	1583	1606	0.55
2610028H24Rik	NM_029816	1	mghv-miR-M1-13-5p_x2701	167	-23.58	2	21	175	197	0.8
2610101N10Rik	NM_001114977	5	mghv-miR-M1-10-5p_x12	169	-21.13	2	20	1465	1484	0.8333
			mghv-miR-M1-10-5p_x78	164	-19.96	2	19	1463	1483	0.8235
			mghv-miR-M1-10-AS-5p_x1	164	-15.18	2	19	1462	1483	0.8235
			mghv-miR-M1-13-5p_x2701	162	-22.49	2	21	346	370	0.7273
			mghv-miR-M1-14_x106	161	-19.25	2	20	4408	4428	0.7778
2610109H07Rik	NM_027426	2	mghv-miR-M1-6_x852	163	-19.61	2	22	278	302	0.7273
			mghv-miR-M1-7-5p_x16	170	-26.34	2	23	3907	3930	0.6667
2610301B20Rik	NM_026005	1	mghv-miR-M1-8_x254	166	-25.98	2	22	1093	1114	0.75
2610528J11Rik	NM_025572	1	mghv-miR-M1-3-5p_x176	160	-24.74	2	21	65	84	0.7895
2700050L05Rik	NM_178115	1	mghv-miR-M1-6*_x58	161	-21.74	2	21	143	162	0.7368
2700062C07Rik	NM_026529	1	mghv-miR-M1-8_x254	161	-24.15	2	21	275	298	0.7
2700078E11Rik	NM_001172096	3	mghv-miR-M1-2-5p_x9704	160	-24.19	2	17	1740	1904-10-27	0.7333
			mghv-miR-M1-2-5p_x110	165	-22.77	2	18	2830	2850	0.75
			mghv-miR-M1-10-AS-5p_x1	161	-17.41	2	22	3917	3939	0.65
2700081O15Rik	NM_175381	1	mghv-miR-M1-10-AS-3p_x3	161	-20.81	2	22	2671	2690	0.7
2700089E24Rik	NM_001163445	1	mghv-miR-M1-2-5p_x590	167	-33.8	2	21	487	509	0.75
2810008M24Rik	NM_001048250	2	mghv-miR-M1-8_x1482	164	-32.9	2	17	1283	1305	0.8
			mghv-miR-M1-8_x33513	163	-33.49	2	22	1283	1304	0.7
2810021J22Rik	NM_172403	1	mghv-miR-M1-10_x122	163	-20.74	2	21	510	532	0.75
2810046L04Rik	NM_173382	1	mghv-miR-M1-13_x133	160	-19.99	2	19	20	41	0.7647
2810407C02Rik	NM_001040396	2	mghv-miR-M1-8_x254	169	-20.45	2	22	1334	1357	0.7
			mghv-miR-M1-14-5p_x1936	160	-19.59	2	21	911	933	0.5789
2810432L12Rik	NM_025944	2	mghv-miR-M1-5*_x390	160	-18.29	2	21	176	197	0.7368
			mghv-miR-M1-6*_x46	160	-23.12	2	18	540	563	0.7778
2810453I06Rik	NM_026050	2	mghv-miR-M1-2-5p_x6528	160	-23.13	2	22	193	216	0.6667
			mghv-miR-M1-3_x1229	162	-29.4	2	21	318	339	0.7368
2900026A02Rik	NM_172884	4	mghv-miR-M1-5*_x390	161	-22.26	2	18	352	373	0.75
			mghv-miR-M1-6_x852	164	-21.26	2	22	2384	2407	0.7619
			mghv-miR-M1-7-5p_x16	162	-21.38	2	23	916	939	0.7143
			mghv-miR-M1-13-5p_x2701	160	-22.12	2	21	95	116	0.6842
3110052M02Rik	NM_001166497	1	mghv-miR-M1-13-5p_x2701	160	-26.97	2	19	2173	2193	0.7647
4632411B12Rik	NM_172652	3	mghv-miR-M1-6_x852	168	-25.06	2	22	275	1900-10-24	0.7143
			mghv-miR-M1-6*_x58	162	-24.2	2	20	347	371	0.7143
			mghv-miR-M1-10-AS-3p_x3	165	-17.6	2	22	399	421	0.7
4632415K11Rik	NM_028883	1	mghv-miR-M1-2-5p_x9704	160	-25.43	2	19	489	510	0.7647
4632428N05Rik	NM_001159572	1	mghv-miR-M1-8_x254	166	-29.56	2	22	2897	2923	0.7826
4732418C07Rik	NM_172698	1	mghv-miR-M1-7-5p_x16	161	-18.24	2	23	1322	1346	0.6818
4831426I19Rik	NM_001042699	1	mghv-miR-M1-2-5p_x110	163	-24.39	2	16	1298	1318	0.7857
4833439L19Rik	NM_001252645	4	mghv-miR-M1-2-5p_x5697	161	-24.8	2	23	682	706	0.6818
			mghv-miR-M1-8_x1482	168	-26.74	2	21	56	78	0.6842
			mghv-miR-M1-8_x33513	165	-28.53	2	22	55	77	0.65
			mghv-miR-M1-8-AS-5p_x8	163	-24.34	2	21	55	77	0.7
4921501E09Rik	NM_001009544	1	mghv-miR-M1-12_x85	161	-18.61	2	18	683	706	0.8125
4921504E06Rik	NM_027600	1	mghv-miR-M1-14-5p_x94	160	-22.24	2	20	82	102	0.7895
4930402H24Rik	NM_029432	1	mghv-miR-M1-8-AS-3p_x2	167	-30.23	2	21	449	471	0.75
4930430D24Rik	NM_001034856	1	mghv-miR-M1-13_x133	170	-21.31	2	19	107	129	0.8235
4930473A06Rik	NM_001081012	1	mghv-miR-M1-7-3p_x86	171	-31.87	2	21	100	124	0.7619
4930506M07Rik	NM_001114312	2	mghv-miR-M1-10-5p_x78	164	-21.61	2	17	189	210	0.8667
			mghv-miR-M1-10-AS-5p_x1	161	-18.52	2	19	185	210	0.75
4930519G04Rik	NM_026263	1	mghv-miR-M1-2-5p_x110	166	-26.14	2	19	525	545	0.7647
4930523C07Rik	NM_001162896	1	mghv-miR-M1-13-5p_x2701	167	-27.68	2	21	1978	2001	0.7619
4930539E08Rik	NM_172450	1	mghv-miR-M1-13_x133	165	-20.32	2	22	1039	1061	0.7
4930544D05Rik	NM_001145537	1	mghv-miR-M1-14-5p_x734	164	-31.31	2	23	48	73	0.7391
4930547N16Rik	NM_029249	1	mghv-miR-M1-13-5p_x2701	173	-30.92	2	18	679	700	0.8125
4930555G01Rik	NM_175393	1	mghv-miR-M1-2-5p_x110	173	-29.64	2	20	420	439	0.8889
4930558K02Rik	NM_001204904	1	mghv-miR-M1-6_x852	164	-24.38	2	22	45	71	0.6667
4930563D23Rik	NM_029252	1	mghv-miR-M1-10-AS-5p_x1	160	-19.67	2	22	112	135	0.7143
4930571K23Rik	NM_001145759	2	mghv-miR-M1-9-5p_x18	165	-25.67	2	22	576	598	0.75
			mghv-miR-M1-14-5p_x94	170	-22.86	2	19	153	173	0.8235
4930572J05Rik	NM_198607	1	mghv-miR-M1-2-5p_x590	160	-25.02	2	21	115	136	0.6842
4930579F01Rik	NM_001163385	2	mghv-miR-M1-10-5p_x78	162	-21.9	2	21	80	103	0.7143
			mghv-miR-M1-10-AS-5p_x1	163	-20.46	2	22	82	103	0.7
4930596D02Rik	NM_001033766	1	mghv-miR-M1-9_x57	166	-15.9	2	19	92	113	0.8235
4931406B18Rik	NM_028737	1	mghv-miR-M1-7-5p_x16	172	-23.82	2	23	1955	1977	0.8095
4931406P16Rik	NM_172741	2	mghv-miR-M1-10-5p_x78	165	-19.27	2	21	1072	1091	0.7895
			mghv-miR-M1-10-AS-5p_x1	169	-22.79	2	21	1071	1091	0.7895
4931429I11Rik	NM_001081121	2	mghv-miR-M1-8_x1482	167	-26.58	2	22	55	76	0.75
			mghv-miR-M1-8_x33513	162	-27.07	2	21	54	75	0.7368
4931440F15Rik	NM_176829	1	mghv-miR-M1-14-5p_x1936	160	-25.67	2	20	425	445	0.7778
4932411E22Rik	NM_172534	2	mghv-miR-M1-2-5p_x6528	162	-28.11	2	22	55	77	0.7619
			mghv-miR-M1-4_x32	161	-25.47	2	15	1035	1057	0.9286
4932411N23Rik	NM_177705	1	mghv-miR-M1-12_x85	161	-21.64	2	14	478	501	0.9167
4932441B19Rik	NM_001083890	1	mghv-miR-M1-9_x57	161	-15.81	2	21	501	520	0.7895
4933403F05Rik	NM_153794	1	mghv-miR-M1-13-5p_x2701	167	-26.58	2	21	4927	4949	0.7
4933407H18Rik	NM_001081101	1	mghv-miR-M1-14-5p_x94	165	-23.32	2	19	889	910	0.7778
4933407P14Rik	NM_199019	1	mghv-miR-M1-14-5p_x94	162	-20.38	2	20	23	45	0.75
4933411K20Rik	NM_025747	1	mghv-miR-M1-10-AS-3p_x3	160	-19.72	2	22	541	566	0.6522
4933425L06Rik	NM_025751	1900-01-01	mghv-miR-M1-3_x1229	173	-25.88	2	22	247	269	0.75
4933427D06Rik	NM_175017	1	mghv-miR-M1-8_x33513	166	-27.93	2	21	1208	1232	0.7619
5031439G07Rik	NM_001033273	1	mghv-miR-M1-2_x4	162	-31.92	2	21	3039	3059	0.7895
5033411D12Rik	NM_138654	1	mghv-miR-M1-8_x254	161	-35	2	23	29	53	0.6364
5430427O19Rik	NM_001163539	1	mghv-miR-M1-8_x254	162	-25.69	2	23	2661	2684	0.6667
5730403B10Rik	NM_025670	1	mghv-miR-M1-3_x1229	162	-22.09	2	20	118	142	0.75
5730455O13Rik	NM_001081075	1	mghv-miR-M1-8_x1482	165	-24.03	2	18	37	59	0.75
5730494M16Rik	NM_001142698	1	mghv-miR-M1-6_x852	167	-19.37	2	21	1414	1437	0.75
5730494N06Rik	NM_001141971	1	mghv-miR-M1-7-5p_x16	164	-24.47	2	19	479	501	0.8235
5730559C18Rik	NM_028872	1	mghv-miR-M1-13-5p_x2701	179	-32.87	2	21	394	417	0.8571
6230409E13Rik	NM_175234	3	mghv-miR-M1-1_x1342	164	-19.39	2	21	7399	7420	0.7368
			mghv-miR-M1-2-5p_x5697	172	-29.9	2	22	3464	3488	0.7619
			mghv-miR-M1-8*_x129	165	-24.87	2	20	33	53	0.7778
6330403A02Rik	NM_001081227	2	mghv-miR-M1-8_x254	165	-28.36	2	23	2442	2467	0.6957
			mghv-miR-M1-13-5p_x2701	162	-28.95	2	21	5127	5147	0.6842
6330406I15Rik	NM_027519	1	mghv-miR-M1-1_x1342	165	-21.75	2	21	72	91	0.7895
6330408A02Rik	NM_177312	1	mghv-miR-M1-1_x1342	174	-27.53	2	21	577	597	0.7895
6330439K17Rik	NM_172859	5	mghv-miR-M1-2-5p_x5697	165	-28.08	2	22	361	384	0.65
			mghv-miR-M1-2-5p_x9704	160	-27.77	2	21	361	383	0.6316
			mghv-miR-M1-7-5p_x16	167	-27.01	2	21	843	867	0.75
			mghv-miR-M1-9_x57	162	-12.08	2	21	3423	3443	0.7368
			mghv-miR-M1-13-5p_x2701	166	-21.34	2	19	1284	1305	0.8235
6330512M04Rik	NM_177265	1	mghv-miR-M1-1_x1342	167	-23.91	2	21	1922	1944	0.75
6330578E17Rik	NM_198006	1	mghv-miR-M1-12*_x10	160	-17.02	2	22	2509	2532	0.7143
6720456H20Rik	NM_172600	1	mghv-miR-M1-2-5p_x110	160	-26.69	2	13	2691	2711	1
8430406I07Rik	NM_028984	1	mghv-miR-M1-6_x852	165	-22.31	2	20	428	449	0.7778
8430419L09Rik	NM_028982	1	mghv-miR-M1-9-5p_x18	164	-24.79	2	18	150	173	0.8235
8430427H17Rik	NM_001001986	2	mghv-miR-M1-2-5p_x6528	162	-28.75	2	22	2588	2608	0.7
			mghv-miR-M1-2-5p_x110	162	-25.54	2	16	585	606	0.8667
9030425E11Rik	NM_133733	1	mghv-miR-M1-12*_x10	160	-20.04	2	18	129	152	0.8235
9030612E09Rik	NM_172419	1	mghv-miR-M1-12*_x10	160	-22.13	2	22	874	893	0.75
9030617O03Rik	NM_145448	1	mghv-miR-M1-2-5p_x110	162	-20.16	2	19	856	876	0.6471
9130011E15Rik	NM_198296	1	mghv-miR-M1-3-5p_x176	162	-22.78	2	21	598	618	0.7895
9130011J15Rik	NM_172396	3	mghv-miR-M1-8_x254	162	-25.62	2	20	1217	1241	0.6842
			mghv-miR-M1-8_x1864	163	-30.16	2	21	2114	2137	0.6667
			mghv-miR-M1-14_x106	160	-19.67	2	17	1028	1049	0.8
9230110F15Rik	NM_029863	1	mghv-miR-M1-13-5p_x2701	162	-27	2	21	484	508	0.7727
9430020K01Rik	NM_001081963	1	mghv-miR-M1-9-5p_x18	163	-16.53	2	20	1497	1519	0.7222
9430031J16Rik	NM_172849	2	mghv-miR-M1-12_x85	164	-25.73	2	18	823	847	0.7647
			mghv-miR-M1-13_x133	169	-20.13	2	22	2023	2045	0.75
9530068E07Rik	NM_153117	4	mghv-miR-M1-1*_x18	163	-21.15	2	18	498	518	0.875
			mghv-miR-M1-8_x1864	166	-26.4	2	20	933	955	0.6842
			mghv-miR-M1-10-5p_x12	165	-22.27	2	18	339	1900-12-24	0.8125
			mghv-miR-M1-10-5p_x78	160	-23.78	2	17	337	358	0.8
9630033F20Rik	NM_177003	2	mghv-miR-M1-2-5p_x6528	161	-22.13	2	18	1982	2004	0.8125
			mghv-miR-M1-2-5p_x9704	162	-25.23	2	15	2110	2132	0.9231
9830001H06Rik	NM_001164663	1	mghv-miR-M1-3_x1229	165	-29.11	2	18	7401	7423	0.75
9830147E19Rik	NM_001242388	1	mghv-miR-M1-10_x122	162	-21.17	2	21	318	341	0.7619
9930013L23Rik	NM_030728	1	mghv-miR-M1-8_x254	166	-26.91	2	19	632	655	0.7647
9930021J03Rik	NM_172836	1	mghv-miR-M1-8-AS-5p_x8	163	-26.07	2	21	851	874	0.7143
9930104L06Rik	NM_177573	1	mghv-miR-M1-8_x1482	160	-22.88	2	22	927	950	0.7143
a	NM_015770	1	mghv-miR-M1-14-5p_x734	173	-30.34	2	22	16	39	0.75
A130010J15Rik	NM_001160359	1	mghv-miR-M1-12*_x10	166	-21.9	2	20	192	216	0.8
A130022J15Rik	NM_175313	1	mghv-miR-M1-3_x1229	166	-27.09	2	22	161	183	0.8095
A1cf	NM_001081074	1	mghv-miR-M1-3_x1229	160	-24.79	2	21	931	953	0.6842
A230046K03Rik	NM_001033375	1	mghv-miR-M1-10_x122	160	-12.75	2	17	1137	1158	0.8
A230051G13Rik	NM_173785	3	mghv-miR-M1-8_x1482	173	-26.08	2	18	2669	2691	0.875
			mghv-miR-M1-8_x33513	168	-26.82	2	17	2668	2690	0.8667
			mghv-miR-M1-8_x1864	163	-23	2	16	2668	2689	0.8571
A330049M08Rik	NM_001168498	2	mghv-miR-M1-2-5p_x5697	168	-28.39	2	21	517	540	0.7368
			mghv-miR-M1-2-5p_x9704	163	-27.65	2	20	517	539	0.7222
A430033K04Rik	NM_183025	1	mghv-miR-M1-9_x57	160	-15.82	2	17	67	88	0.8
A430105I19Rik	NM_001001982	1	mghv-miR-M1-2-5p_x6528	160	-26.4	2	19	1179	1200	0.7647
A530016L24Rik	NM_177039	1	mghv-miR-M1-10-AS-3p_x3	164	-18.28	2	22	1225	1248	0.7619
A730011L01Rik	NM_001164636	1	mghv-miR-M1-5_x63444	167	-26.14	2	20	3863	3883	0.7778
A730037C10Rik	NM_177203	1	mghv-miR-M1-7-5p_x16	162	-22.66	2	19	353	376	0.7059
A830007P12Rik	NM_146115	1	mghv-miR-M1-5*_x390	163	-20.75	2	20	1288	1309	0.7778
AA986860	NM_177604	1	mghv-miR-M1-2-5p_x110	173	-29.68	2	19	667	688	0.8333
Aadacl3	NM_001085503	1	mghv-miR-M1-6*_x46	162	-24.38	2	16	1661	1684	0.875
Aagab	NM_025857	2	mghv-miR-M1-8_x254	168	-24.88	2	23	1384	1409	0.6957
			mghv-miR-M1-8_x1482	163	-25.68	2	22	1384	1408	0.6818
Aak1	NM_001040106	3	mghv-miR-M1-8_x1482	166	-29.77	2	20	11725	11748	0.7895
			mghv-miR-M1-8_x33513	161	-20.45	2	22	4684	4706	0.65
			mghv-miR-M1-8_x33513	161	-29.67	2	19	11724	11747	0.7778
Abat	NM_001170978	1	mghv-miR-M1-13-5p_x2701	160	-20.35	2	19	2587	2607	0.7647
Abca2	NM_007379	1	mghv-miR-M1-7-5p_x16	164	-26.04	2	19	230	256	0.8
Abca5	NM_147219	1	mghv-miR-M1-13-5p_x2701	164	-26.97	2	21	2360	2381	0.6316
Abca8b	NM_013851	2	mghv-miR-M1-10-5p_x12	162	-16.72	2	19	333	353	0.7647
			mghv-miR-M1-10-AS-3p_x3	168	-22.33	2	22	474	497	0.7143
Abcb11	NM_021022	1	mghv-miR-M1-10_x122	167	-16.48	2	20	353	374	0.7222
Abcc4	NM_001033336	2	mghv-miR-M1-2-5p_x5697	160	-30.47	2	22	646	672	0.6087
			mghv-miR-M1-12_x85	165	-20.93	2	18	1290	1313	0.8125
Abcc9	NM_001044720	1	mghv-miR-M1-6_x852	170	-25.72	2	19	1425	1447	0.8235
Abcd1	NM_007435	1	mghv-miR-M1-7-5p_x16	163	-26.02	2	18	165	187	0.8125
Abcd2	NM_011994	1	mghv-miR-M1-10-5p_x78	165	-21.1	2	20	351	375	0.8095
Abce1	NM_015751	5	mghv-miR-M1-1_x1342	160	-21.82	2	21	670	689	0.7895
			mghv-miR-M1-6_x852	160	-18.74	2	22	1565	1588	0.6667
			mghv-miR-M1-8_x254	173	-28.99	2	22	1230	1253	0.75
			mghv-miR-M1-8_x1482	168	-29.79	2	21	1230	1252	0.7368
			mghv-miR-M1-8_x33513	163	-27.48	2	20	1229	1251	0.7222
Abcg4	NM_138955	1	mghv-miR-M1-13-5p_x2701	164	-22.06	2	21	215	236	0.6316
Abhd14b	NM_029631	1	mghv-miR-M1-3_x1229	160	-22.2	2	18	65	88	0.7059
Abhd5	NM_026179	1	mghv-miR-M1-10_x122	163	-21.66	2	21	678	701	0.6667
Abi2	NM_001198571	3	mghv-miR-M1-1_x1342	163	-12.95	2	20	212	233	0.7222
			mghv-miR-M1-2-5p_x5697	177	-30.82	2	22	2174	2197	0.8
			mghv-miR-M1-2-5p_x9704	172	-30.08	2	21	2174	2196	0.7895
Abl1	NM_001112703	1	mghv-miR-M1-2-5p_x590	166	-25.96	2	19	286	307	0.7647
Abl2	NM_001136104	4	mghv-miR-M1-2-5p_x590	163	-27.67	2	21	3264	1908-12-30	0.7143
			mghv-miR-M1-8_x1864	163	-25.47	2	20	6622	6643	0.7222
			mghv-miR-M1-13-5p_x2701	165	-24.8	2	21	4433	4452	0.7895
			mghv-miR-M1-14_x106	162	-18.9	2	21	3073	3093	0.7368
Ablim1	NM_001103177	2	mghv-miR-M1-7-5p_x16	164	-24.86	2	23	718	740	0.6667
			mghv-miR-M1-14-5p_x734	165	-27.71	2	22	3657	3680	0.65
Abp1	NM_001161621	1	mghv-miR-M1-6*_x58	166	-26.78	2	20	213	236	0.7
Abr	NM_198018	1	mghv-miR-M1-1_x1342	161	-15.59	2	18	700	721	0.75
Abt1	NM_013924	3	mghv-miR-M1-8_x33513	167	-27.56	2	22	2152	2176	0.7727
			mghv-miR-M1-8-AS-5p_x8	163	-23.5	2	21	2152	2176	0.7273
			mghv-miR-M1-13-5p_x2701	160	-18.06	2	18	1252	1274	0.8235
Acaca	NM_133360	1	mghv-miR-M1-7-5p_x16	173	-25.13	2	22	666	689	0.75
Acacb	NM_133904	2	mghv-miR-M1-3_x1229	169	-23.46	2	22	167	189	0.7
			mghv-miR-M1-8_x33513	165	-25.95	2	19	510	534	0.7368
Acap2	NM_030138	2	mghv-miR-M1-8_x33513	173	-31.43	2	22	478	500	0.8
			mghv-miR-M1-8_x1864	168	-32.03	2	21	478	499	0.7895
Accn2	NM_009597	2	mghv-miR-M1-2-5p_x590	166	-25.92	2	21	1867	1887	0.7895
			mghv-miR-M1-9-5p_x18	160	-20.35	2	21	868	890	0.6842
Acer2	NM_139306	2	mghv-miR-M1-2-5p_x6528	170	-35.17	2	21	697	722	0.8182
			mghv-miR-M1-13-5p_x2701	162	-27.23	2	20	2872	2895	0.7
Acer3	NM_025408	2	mghv-miR-M1-8_x1482	167	-29.72	2	20	579	601	0.7222
			mghv-miR-M1-8_x33513	162	-30.84	2	19	578	600	0.7059
Acmsd	NM_001033041	1	mghv-miR-M1-1_x1342	164	-18.28	2	21	688	709	0.7368
Acnat1	NM_001164565	4	mghv-miR-M1-8_x33513	163	-18.56	2	20	1407	1429	0.6667
			mghv-miR-M1-8-AS-5p_x8	165	-20.34	2	19	1407	1429	0.7778
			mghv-miR-M1-13_x133	164	-15.1	2	22	3771	3794	0.7619
			mghv-miR-M1-14-5p_x94	160	-23.97	2	18	2833	2854	0.8235
Acot11	NM_025590	1	mghv-miR-M1-3-5p_x176	164	-22.27	2	18	1320	1342	0.8235
Acot2	NM_134188	1	mghv-miR-M1-9-5p_x18	162	-18.69	2	19	31	53	0.7647
Acox1	NM_015729	1	mghv-miR-M1-8_x1482	160	-22.22	2	18	464	487	0.8235
Acox3	NM_030721	1	mghv-miR-M1-4_x56	164	-16.75	2	22	101	124	0.7619
Acp1	NM_001110239	1	mghv-miR-M1-8-AS-3p_x2	167	-31.19	2	21	1432	1454	0.75
Acp5	NM_001102404	1	mghv-miR-M1-12_x85	167	-21.21	2	20	154	177	0.7778
Acsf2	NM_153807	1	mghv-miR-M1-14_x106	162	-20.54	2	21	417	437	0.7368
Acsf3	NM_144932	2	mghv-miR-M1-8_x33513	168	-21.78	2	21	91	113	0.7895
			mghv-miR-M1-8-AS-5p_x8	166	-21.83	2	20	91	113	0.7895
Acsl1	NM_007981	1	mghv-miR-M1-1*_x18	160	-21.53	2	21	1177	1198	0.6842
Acsl4	NM_001033600	1	mghv-miR-M1-1_x1342	161	-16.17	2	18	2196	2217	0.75
Acsm2	NM_001177977	3	mghv-miR-M1-10-5p_x78	170	-23.96	2	21	4439	4459	0.8421
			mghv-miR-M1-10-AS-5p_x1	163	-19.63	2	22	4438	4459	0.7
			mghv-miR-M1-14-5p_x94	161	-24.95	2	20	1618	1637	0.7222
Acss2	NM_019811	1	mghv-miR-M1-4_x56	161	-21.89	2	21	163	183	0.7368
Actb	NM_007393	1	mghv-miR-M1-9_x57	165	-16.11	2	21	239	258	0.7895
Actn4	NM_021895	2	mghv-miR-M1-10-5p_x12	174	-23.46	2	19	208	228	0.8235
			mghv-miR-M1-10-5p_x78	169	-22.29	2	18	206	227	0.8125
Actr1a	NM_016860	1	mghv-miR-M1-3_x1229	168	-29.36	2	21	1443	1465	0.7895
Actr1b	NM_146107	1	mghv-miR-M1-5*_x390	166	-25.38	2	16	581	603	0.9333
Acvr1b	NM_007395	1	mghv-miR-M1-8_x254	166	-28.93	2	23	662	685	0.6667
Acvr1c	NM_001033369	2	mghv-miR-M1-6_x852	162	-20.13	2	20	2060	2085	0.6667
			mghv-miR-M1-13_x133	160	-19.4	2	22	337	360	0.7143
Adam11	NM_001110778	1	mghv-miR-M1-2-5p_x5697	162	-27.51	2	16	706	730	0.8667
Adam12	NM_007400	3	mghv-miR-M1-10-5p_x78	166	-22.97	2	17	2299	2319	0.9333
			mghv-miR-M1-12_x85	162	-26.3	2	21	3394	3420	0.7273
			mghv-miR-M1-13_x133	161	-13.89	2	22	321	343	0.65
Adam17	NM_009615	1	mghv-miR-M1-13-5p_x2701	160	-21.88	2	18	910	933	0.7778
Adam19	NM_009616	2	mghv-miR-M1-9_x57	170	-27.63	2	20	3287	3309	0.7895
			mghv-miR-M1-12_x85	162	-23.31	2	19	2205	2228	0.7059
Adam22	NM_001098225	1	mghv-miR-M1-5_x63444	169	-25.22	2	20	1257	1276	0.7778
Adam23	NM_011780	3	mghv-miR-M1-2-5p_x6528	163	-28.13	2	18	581	602	0.875
			mghv-miR-M1-9_x57	164	-15.67	2	21	1091	1112	0.6842
			mghv-miR-M1-10-AS-3p_x3	168	-18.46	2	21	1671	1693	0.6842
Adam9	NM_007404	1	mghv-miR-M1-5_x63444	161	-19.58	2	20	716	735	0.7778
Adamts1	NM_009621	1	mghv-miR-M1-13_x133	162	-22.27	2	22	818	841	0.7273
Adamts10	NM_172619	1	mghv-miR-M1-2-5p_x110	171	-29.24	2	20	514	534	0.7778
Adamts12	NM_175501	1	mghv-miR-M1-6_x852	161	-19.15	2	19	636	659	0.7222
Adamts14	NM_001081127	2	mghv-miR-M1-1*_x18	161	-25.46	2	20	213	236	0.75
			mghv-miR-M1-7-5p_x16	162	-25.37	2	23	1164	1187	0.619
Adamts15	NM_001024139	2	mghv-miR-M1-2_x4	165	-27.78	2	20	1558	1578	0.8333
			mghv-miR-M1-14-5p_x94	165	-22.81	2	20	100	119	0.8333
Adamts17	NM_001033877	1	mghv-miR-M1-6_x852	166	-22.8	2	19	1457	1479	0.7647
Adamts3	NM_001081401	4	mghv-miR-M1-8_x1482	171	-27.47	2	22	2871	2895	0.8182
			mghv-miR-M1-8_x33513	166	-27.96	2	21	2870	2894	0.8095
			mghv-miR-M1-8_x1864	161	-24.14	2	20	2870	2893	0.8
			mghv-miR-M1-14-5p_x734	162	-20.36	2	23	852	875	0.619
Adamts4	NM_172845	1	mghv-miR-M1-12*_x10	163	-22.42	2	16	203	225	0.8571
Adamts8	NM_013906	1	mghv-miR-M1-12_x85	1900-06-09	-19.16	2	20	617	639	0.7222
Adamts9	NM_175314	2	mghv-miR-M1-7-5p_x16	162	-23.38	2	19	44	67	0.7647
			mghv-miR-M1-13_x133	166	-17.69	2	19	265	287	0.7647
Adamtsl1	NM_029967	1	mghv-miR-M1-4_x56	160	-24.67	2	18	678	704	0.75
Adamtsl5	NM_001113548	1	mghv-miR-M1-8_x254	160	-27.15	2	21	160	183	0.6316
Adap1	NM_172723	1	mghv-miR-M1-9-5p_x18	161	-17.22	2	22	147	169	0.65
Adarb2	NM_052977	1	mghv-miR-M1-10-AS-3p_x3	171	-25.48	2	20	891	913	0.8333
Adck1	NM_028105	1	mghv-miR-M1-6_x852	162	-19.62	2	22	501	521	0.75
Adck2	NM_178873	1	mghv-miR-M1-10-5p_x12	162	-16.63	2	19	652	672	0.7059
Adck3	NM_001163290	2	mghv-miR-M1-8_x254	169	-27.43	2	23	1748	1774	0.75
			mghv-miR-M1-10-5p_x12	162	-17.38	2	19	1373	1393	0.7647
Adck5	NM_172960	1	mghv-miR-M1-10-5p_x12	161	-21.67	2	19	114	135	0.7778
Adcy1	NM_009622	3	mghv-miR-M1-10-5p_x78	165	-21.24	2	18	5345	5366	0.8125
			mghv-miR-M1-10-AS-5p_x1	165	-19.81	2	18	5344	5366	0.75
			mghv-miR-M1-14-5p_x94	161	-17.88	2	20	2377	2396	0.7222
Adcy3	NM_001159536	2	mghv-miR-M1-8_x1864	161	-23.51	2	18	183	204	0.75
			mghv-miR-M1-10-AS-5p_x1	168	-15.39	2	22	453	476	0.7619
Adcy5	NM_001012765	2	mghv-miR-M1-2-5p_x6528	161	-27.85	2	22	436	458	0.65
			mghv-miR-M1-2-5p_x5697	162	-33.74	2	23	434	457	0.619
Adcyap1r1	NM_001025372	3	mghv-miR-M1-1*_x18	160	-17.53	2	21	3229	3250	0.7368
			mghv-miR-M1-2-5p_x6528	161	-25.13	2	18	968	990	0.8125
			mghv-miR-M1-3_x1229	168	-27.95	2	22	248	271	0.7619
Add1	NM_001024458	1	mghv-miR-M1-6_x852	161	-14.24	2	22	1462	1484	0.65
Adhfe1	NM_175236	3	mghv-miR-M1-2-5p_x110	1900-06-13	-23.09	2	18	1381	1401	0.75
			mghv-miR-M1-7-5p_x16	168	-25.75	2	18	1382	1406	0.8824
			mghv-miR-M1-10-5p_x78	166	-17.75	2	19	800	821	0.7647
Adnp	NM_009628	3	mghv-miR-M1-8_x254	160	-23.7	2	23	868	893	0.7391
			mghv-miR-M1-9_x57	162	-19.11	2	15	389	410	0.9231
			mghv-miR-M1-13-5p_x2701	160	-24.71	2	19	301	321	0.7647
Adora1	NM_001008533	1	mghv-miR-M1-12_x85	162	-18.14	2	15	3689	3712	0.9231
Adpgk	NM_028121	1	mghv-miR-M1-2-5p_x9704	161	-26.82	2	21	307	327	0.7368
Adra1d	NM_013460	1	mghv-miR-M1-3_x1229	162	-26.46	2	19	87	109	0.7647
Adra2a	NM_007417	4	mghv-miR-M1-2-5p_x9704	161	-27.22	2	22	938	960	0.6
			mghv-miR-M1-6_x852	161	-19.02	2	19	209	233	0.7895
			mghv-miR-M1-9_x57	162	-18.11	2	21	1326	1349	0.7619
			mghv-miR-M1-10-5p_x78	163	-19.1	2	21	484	507	0.7619
Adra2b	NM_009633	3	mghv-miR-M1-9_x57	166	-23.07	2	21	1081	1101	0.7895
			mghv-miR-M1-9_x57	163	-21.84	2	21	129	151	0.75
			mghv-miR-M1-13_x133	167	-20.49	2	22	1425	1449	0.7727
Aebp1	NM_009636	1	mghv-miR-M1-2-5p_x9704	160	-29.51	2	21	88	108	0.7368
Afap1l2	NM_001177796	1	mghv-miR-M1-10_x122	163	-18.38	2	21	481	506	0.7391
Aff1	NM_001080798	3	mghv-miR-M1-6*_x46	166	-22.11	2	20	1731	1753	0.7895
			mghv-miR-M1-8_x254	164	-24.25	2	22	1527	1551	0.619
			mghv-miR-M1-13-5p_x2701	169	-26.54	2	19	2654	2676	0.7778
Aff4	NM_033565	1	mghv-miR-M1-2-5p_x590	167	-30.03	2	21	5188	5210	0.75
Afmid	NM_027827	1	mghv-miR-M1-8_x254	161	-27.21	2	23	309	333	0.5909
Agap1	NM_001037136	8	mghv-miR-M1-2-5p_x6528	163	-28.32	2	22	2432	2453	0.7
			mghv-miR-M1-6_x852	168	-19.57	2	21	5526	5548	0.7368
			mghv-miR-M1-7-5p_x16	167	-20.36	2	20	5889	5912	0.7778
			mghv-miR-M1-8_x33513	177	-28.57	2	22	3464	3486	0.8
			mghv-miR-M1-8_x1864	172	-29.17	2	21	3464	3485	0.7895
			mghv-miR-M1-8_x1864	160	-23.33	2	17	6048	6069	0.8
			mghv-miR-M1-13_x133	167	-17.02	2	21	2162	2185	0.75
			mghv-miR-M1-13_x133	160	-19.53	2	22	2735	2758	0.7143
Agap2	NM_001033263	1	mghv-miR-M1-2-5p_x6528	164	-25.57	2	21	618	640	0.6842
Agbl4	NM_001048189	1	mghv-miR-M1-12*_x10	167	-20.91	2	22	177	198	0.75
Agl	NM_001081326	1	mghv-miR-M1-13-5p_x2701	164	-20.26	2	17	4010	4031	0.8
Agpat3	NM_053014	3	mghv-miR-M1-2-5p_x9704	165	-32.88	2	19	241	264	0.7222
			mghv-miR-M1-6*_x46	171	-26.77	2	20	224	245	0.7778
			mghv-miR-M1-14-5p_x94	162	-18.73	2	19	1341	1361	0.7647
Agps	NM_172666	1	mghv-miR-M1-10-AS-5p_x1	160	-18	2	22	1925	1948	0.7143
Agtpbp1	NM_001048008	1	mghv-miR-M1-10-AS-5p_x1	165	-20.61	2	22	385	404	0.8
Agtr1b	NM_175086	1	mghv-miR-M1-7-5p_x16	160	-19.8	2	23	185	207	0.6667
Agtr2	NM_007429	1	mghv-miR-M1-1_x1342	160	-15.21	2	21	319	340	0.6842
Agtrap	NM_009642	1	mghv-miR-M1-14-5p_x94	161	-23.85	2	19	2677	2699	0.7368
Ahcy	NM_016661	1	mghv-miR-M1-1_x1342	169	-23.15	2	18	880	901	0.8125
Ahcyl1	NM_145542	1	mghv-miR-M1-14-5p_x1936	160	-18.15	2	18	1452	1475	0.8235
Ahcyl2	NM_001171000	1	mghv-miR-M1-2-5p_x110	169	-28.64	2	20	2842	2861	0.8333
Ahi1	NM_001177776	1	mghv-miR-M1-8_x254	161	-22.64	2	19	14	38	0.7222
Ahr	NM_013464	1	mghv-miR-M1-13_x133	160	-14.56	2	21	979	1002	0.8095
AI462493	NM_001160356	1	mghv-miR-M1-10-5p_x12	164	-17.25	2	17	283	303	0.8667
AI464131	NM_001085515	1	mghv-miR-M1-2-5p_x6528	161	-23.79	2	20	1025	1046	0.7778
AI480653	NM_198626	2	mghv-miR-M1-1_x1342	161	-17.76	2	19	864	886	0.7778
			mghv-miR-M1-8_x1864	161	-28.05	2	19	353	375	0.6667
AI593442	NM_178906	1	mghv-miR-M1-12_x85	170	-30.09	2	20	2978	3004	0.8095
AI597468	NM_001013028	1	mghv-miR-M1-6_x852	164	-22.51	2	22	1573	1598	0.6957
AI646023	NM_198860	4	mghv-miR-M1-2-5p_x6528	171	-34.06	2	22	1447	1468	0.75
			mghv-miR-M1-2-5p_x6528	161	-25.1	2	22	3001	3023	0.7
			mghv-miR-M1-2-5p_x5697	168	-35.75	2	23	1445	1467	0.7143
			mghv-miR-M1-10-AS-5p_x1	161	-14.81	2	20	1829	1850	0.7778
AI846148	NM_001033139	2	mghv-miR-M1-6*_x58	160	-20.69	2	21	1533	1551	0.7895
			mghv-miR-M1-6*_x46	160	-22.38	2	21	1532	1550	0.7895
AI848100	NM_172645	1	mghv-miR-M1-8_x1864	163	-22.09	2	21	879	901	0.75
Aicda	NM_009645	1	mghv-miR-M1-13-5p_x2701	160	-18.31	2	21	909	930	0.6316
Aifm2	NM_001039194	2	mghv-miR-M1-8_x1482	167	-27.69	2	20	888	910	0.7778
			mghv-miR-M1-8_x33513	162	-27.54	2	19	887	909	0.7647
Aim1l	NM_001162970	1	mghv-miR-M1-6_x852	162	-21.85	2	21	5	26	0.7895
Ajap1	NM_001099299	1	mghv-miR-M1-14_x106	160	-16.63	2	21	558	579	0.6316
Ak3	NM_021299	1	mghv-miR-M1-8_x254	160	-25.1	2	23	1128	1150	0.7143
Akap1	NM_001042541	3	mghv-miR-M1-8_x1482	174	-30.64	2	21	494	515	0.8421
			mghv-miR-M1-8_x33513	169	-33.73	2	20	493	514	0.8333
			mghv-miR-M1-8_x1864	164	-29.91	2	19	493	513	0.8235
Akap10	NM_019921	3	mghv-miR-M1-2-5p_x9704	167	-28.97	2	21	940	963	0.75
			mghv-miR-M1-2-5p_x590	162	-29.77	2	20	940	962	0.7368
			mghv-miR-M1-8_x1482	162	-22.39	2	20	805	829	0.7
Akap11	NM_001164503	1	mghv-miR-M1-2-5p_x9704	161	-27.79	2	21	1205	1227	0.8
Akap13	NM_029332	1	mghv-miR-M1-13-5p_x2701	162	-27.97	2	21	2928	2952	0.7273
Akap17b	NM_001081956	1	mghv-miR-M1-6_x852	167	-20.98	2	22	1961	1982	0.8
Akap7	NM_018747	1	mghv-miR-M1-8-AS-5p_x8	163	-19.32	2	21	396	418	0.75
Akirin2	NM_001007589	1	mghv-miR-M1-1_x1342	163	-24.07	2	21	472	494	0.75
Akt1	NM_001165894	1	mghv-miR-M1-14-5p_x94	161	-22.49	2	18	167	187	0.75
Akt2	NM_001110208	1	mghv-miR-M1-6*_x58	160	-23.2	2	21	1152	1173	0.6842
Akt3	NM_011785	2	mghv-miR-M1-10-AS-5p_x1	163	-15.8	2	22	2350	2371	0.75
			mghv-miR-M1-13_x133	163	-21.65	2	20	573	593	0.8333
Alas2	NM_001102446	2	mghv-miR-M1-2-5p_x5697	166	-31.43	2	21	18	44	0.7727
			mghv-miR-M1-2-5p_x9704	161	-31.92	2	20	18	43	0.7619
Alcam	NM_009655	1	mghv-miR-M1-7-3p_x86	164	-17.9	2	22	801	824	0.7619
Aldh18a1	NM_019698	1	mghv-miR-M1-8_x1864	167	-29.58	2	21	403	425	0.75
Aldh1l2	NM_153543	1	mghv-miR-M1-13-5p_x2701	163	-24.4	2	20	921	942	0.7222
Aldh5a1	NM_172532	1	mghv-miR-M1-3_x1229	163	-26.92	2	20	2949	2971	0.6667
Aldh7a1	NM_001127338	1	mghv-miR-M1-6_x852	171	-26.11	2	17	421	444	0.9375
Alg10b	NM_001033441	1	mghv-miR-M1-3_x1229	165	-26.91	2	20	1380	1405	0.7619
Alg11	NM_001243161	2	mghv-miR-M1-6*_x58	166	-18.49	2	19	3315	3336	0.8235
			mghv-miR-M1-6*_x46	161	-20.34	2	18	3314	3335	0.8125
Alg2	NM_019998	2	mghv-miR-M1-5_x63444	161	-19.03	2	19	1576	1598	0.7895
			mghv-miR-M1-13_x133	161	-17.2	2	22	660	682	0.7
Alg9	NM_133981	1	mghv-miR-M1-7-5p_x16	160	-19.65	2	19	238	260	0.7647
Alkbh5	NM_172943	2	mghv-miR-M1-5*_x390	166	-25.15	2	21	1644	1664	0.7895
			mghv-miR-M1-6_x852	162	-20.31	2	22	2760	2782	0.6667
Alox12	NM_007440	1	mghv-miR-M1-2-5p_x110	167	-24.87	2	20	100	120	0.7778
Alox8	NM_009661	1	mghv-miR-M1-1_x1342	160	-19.65	2	21	859	880	0.6842
Alpl	NM_007431	3	mghv-miR-M1-2-5p_x590	178	-31.56	2	20	506	528	0.8947
			mghv-miR-M1-2-5p_x110	168	-27.53	2	18	505	526	0.8824
			mghv-miR-M1-3-5p_x176	170	-27.14	2	21	102	122	0.8421
Alppl2	NM_007433	1	mghv-miR-M1-1*_x18	164	-25.1	2	18	73	96	0.8333
Als2cl	NM_001146059	2	mghv-miR-M1-2-5p_x6528	168	-34.02	2	22	1908	1931	0.7143
			mghv-miR-M1-2-5p_x5697	163	-34.56	2	21	1906	1930	0.7
Als2cr11	NM_175200	1	mghv-miR-M1-8-AS-5p_x8	160	-17.27	2	20	83	102	0.7778
Alx4	NM_007442	3	mghv-miR-M1-2-5p_x6528	164	-24.87	2	22	2351	2374	0.7619
			mghv-miR-M1-2-5p_x6528	162	-27.09	2	21	3170	3191	0.7368
			mghv-miR-M1-7-5p_x16	173	-28.62	2	18	2765	2788	0.875
Ambn	NM_009664	1	mghv-miR-M1-9_x57	160	-19.71	2	19	316	336	0.8235
Amdhd1	NM_027908	3	mghv-miR-M1-3_x1229	160	-23.11	2	17	137	159	0.8
			mghv-miR-M1-14-5p_x1936	173	-26.79	2	22	264	286	0.7
			mghv-miR-M1-14-5p_x634	168	-28.12	2	21	264	285	0.6842
Amfr	NM_011787	1	mghv-miR-M1-1*_x18	161	-19.26	2	18	635	656	0.75
Amigo1	NM_001004293	2	mghv-miR-M1-8_x1864	168	-26.64	2	17	134	155	0.8667
			mghv-miR-M1-14-5p_x1936	165	-23.65	2	22	1877	1899	0.7
Ammecr1	NM_019496	1	mghv-miR-M1-13-5p_x2701	171	-32.97	2	21	27	49	0.8
Ammecr1l	NM_001242430	7	mghv-miR-M1-1*_x18	160	-22.26	2	21	1856	1874	0.7368
			mghv-miR-M1-5_x63444	162	-25.64	2	20	809	832	0.7619
			mghv-miR-M1-6_x852	160	-19.4	2	19	1496	1517	0.7647
			mghv-miR-M1-8_x1864	161	-25.06	2	18	2002	2023	0.6875
			mghv-miR-M1-10-5p_x12	170	-21.13	2	20	2876	2897	0.8421
			mghv-miR-M1-10-5p_x78	167	-20.13	2	21	2874	2896	0.8
			mghv-miR-M1-10-AS-5p_x1	168	-14.89	2	22	2873	2896	0.7619
Amot	NM_153319	1	mghv-miR-M1-13_x133	161	-19.55	2	22	801	823	0.65
Amotl1	NM_001081395	2	mghv-miR-M1-7-5p_x16	160	-22.97	2	18	762	786	0.7647
			mghv-miR-M1-13-5p_x2701	161	-25.94	2	21	760	781	0.8
Amz1	NM_173405	1	mghv-miR-M1-10-AS-5p_x1	1900-06-14	-19.22	2	22	502	522	0.8
Anapc10	NM_026904	1	mghv-miR-M1-12_x85	171	-26.42	2	21	540	564	0.75
Anapc11	NM_001038230	2	mghv-miR-M1-10-5p_x78	161	-18.9	2	16	1425	1445	0.9286
			mghv-miR-M1-13-5p_x2701	170	-31.57	2	21	879	899	0.8421
Ankdd1b	NM_001042714	2	mghv-miR-M1-8_x254	168	-26.3	2	19	419	441	0.8824
			mghv-miR-M1-8_x1482	163	-24.83	2	18	419	440	0.875
Ankfy1	NM_009671	2	mghv-miR-M1-6_x852	164	-23.14	2	19	1907	1928	0.8235
			mghv-miR-M1-8_x1482	164	-22.48	2	21	4469	4491	0.6842
Ankle2	NM_001253814	1	mghv-miR-M1-14-5p_x94	163	-21.54	2	20	1348	1368	0.7222
Ankrd10	NM_001167967	1	mghv-miR-M1-8-AS-5p_x8	160	-23.81	2	21	1289	1310	0.6842
Ankrd10	NM_133971	1	mghv-miR-M1-14_x106	163	-23.54	2	21	275	298	0.7143
Ankrd13a	NM_026718	1	mghv-miR-M1-2-5p_x590	167	-30.29	2	21	119	141	0.75
Ankrd22	NM_024204	1	mghv-miR-M1-12_x85	162	-27.34	2	23	747	769	0.7727
Ankrd26	NM_001081112	1	mghv-miR-M1-13-5p_x2701	164	-26.48	2	21	314	333	0.7895
Ankrd28	NM_001024604	3	mghv-miR-M1-2_x4	162	-28.32	2	17	1672	1692	0.8667
			mghv-miR-M1-10-5p_x78	163	-22.72	2	17	1125	1147	0.875
			mghv-miR-M1-10-AS-5p_x1	168	-23.2	2	22	1124	1147	0.7619
Ankrd33b	NM_001164441	1	mghv-miR-M1-5_x63444	161	-21.64	2	20	2041	2060	0.7778
Ankrd45	NM_028664	1	mghv-miR-M1-6_x852	167	-22.91	2	22	1496	1521	0.7391
Ankrd52	NM_172790	1	mghv-miR-M1-3_x1229	173	-25.73	2	22	3233	3255	0.75
Ankrd61	NM_025732	2	mghv-miR-M1-1*_x18	164	-22.96	2	18	65	87	0.8235
			mghv-miR-M1-9-5p_x18	166	-32.72	2	16	3	26	0.9333
Anks1	NM_181413	1	mghv-miR-M1-10-AS-3p_x3	164	-17.4	2	22	1830	1853	0.7143
Anks1b	NM_001177397	3	mghv-miR-M1-2-5p_x6528	160	-22.86	2	22	131	154	0.619
			mghv-miR-M1-7-5p_x16	162	-20.91	2	23	2171	2194	0.7143
			mghv-miR-M1-13-5p_x2701	160	-23.33	2	21	1951	1972	0.6316
Anp32a	NM_009672	1	mghv-miR-M1-2-5p_x6528	160	-26.83	2	18	44	68	0.7778
Anpep	NM_008486	1	mghv-miR-M1-14-5p_x94	170	-26.59	2	19	330	350	0.8235
Antxr1	NM_054041	1	mghv-miR-M1-6_x852	161	-14.92	2	22	1152	1174	0.65
Anxa4	NM_013471	1	mghv-miR-M1-1_x1342	166	-19.73	2	21	360	380	0.7895
Anxa8	NM_013473	1	mghv-miR-M1-8_x1864	164	-24.61	2	21	431	452	0.6842
Ap1ar	NM_145964	3	mghv-miR-M1-2-5p_x110	161	-22.5	2	18	798	818	0.8125
			mghv-miR-M1-3_x1229	162	-29.04	2	15	219	241	0.8462
			mghv-miR-M1-9_x57	160	-19.21	2	19	940	960	0.7647
Ap1b1	NM_001243043	1	mghv-miR-M1-8_x1864	167	-32.92	2	21	348	370	0.75
Ap1m2	NM_001110300	1	mghv-miR-M1-8_x254	172	-30.81	2	23	238	260	0.7619
Ap1s3	NM_183027	3	mghv-miR-M1-2-5p_x9704	167	-30.95	2	16	1817	1839	0.9286
			mghv-miR-M1-2-5p_x590	162	-31.28	2	15	1817	1838	0.9231
			mghv-miR-M1-13_x133	161	-15.79	2	22	791	813	0.7
Ap3b2	NM_021492	1	mghv-miR-M1-2-5p_x6528	160	-30.16	2	22	49	74	0.6957
Ap3m1	NM_018829	3	mghv-miR-M1-10-5p_x12	161	-19.53	2	20	134	153	0.7778
			mghv-miR-M1-10-5p_x78	161	-21.01	2	20	132	152	0.7778
			mghv-miR-M1-10-AS-5p_x1	163	-16.59	2	22	131	152	0.7
Ap3m2	NM_001122820	3	mghv-miR-M1-8_x1482	174	-30.09	2	21	1049	1073	0.8095
			mghv-miR-M1-8_x33513	169	-32.12	2	20	1048	1072	0.8
			mghv-miR-M1-8-AS-5p_x8	160	-19.43	2	21	1051	1072	0.7368
Ap3s2	NM_009682	5	mghv-miR-M1-1*_x18	167	-28.68	2	21	121	144	0.7143
			mghv-miR-M1-3_x1229	165	-29.38	2	20	1132	1157	0.7619
			mghv-miR-M1-3_x1229	164	-27.25	2	22	4961	1913-08-23	0.7619
			mghv-miR-M1-6*_x58	170	-34.67	2	21	2915	2935	0.7368
			mghv-miR-M1-12*_x10	165	-26.17	2	20	4208	4232	0.8
Ap4e1	NM_175550	2	mghv-miR-M1-10-5p_x78	163	-15.63	2	20	2463	2484	0.7778
			mghv-miR-M1-10-AS-5p_x1	165	-13.25	2	22	2462	2484	0.75
Apba1	NM_177034	10	mghv-miR-M1-2_x4	166	-35.18	2	20	1681	1703	0.7895
			mghv-miR-M1-2-5p_x6528	164	-28.1	2	18	3103	3126	0.8235
			mghv-miR-M1-2-5p_x5697	165	-32.9	2	23	3101	3125	0.7273
			mghv-miR-M1-2-5p_x9704	160	-29.47	2	22	3101	3124	0.7143
			mghv-miR-M1-2-5p_x590	170	-27.33	2	21	2790	2810	0.8421
			mghv-miR-M1-2-5p_x110	160	-24.67	2	19	2789	2808	0.8235
			mghv-miR-M1-8_x254	169	-26.84	2	23	1113	1137	0.6818
			mghv-miR-M1-8_x1482	164	-27.17	2	22	1113	1136	0.6667
			mghv-miR-M1-10-5p_x78	163	-22.83	2	16	1091	1112	0.8571
			mghv-miR-M1-10-AS-5p_x1	169	-20.34	2	22	1090	1112	0.75
Apbb2	NM_001201413	5	mghv-miR-M1-1*_x18	163	-21.37	2	16	3123	3144	0.8571
			mghv-miR-M1-2-5p_x590	163	-25.96	2	21	3266	3288	0.75
			mghv-miR-M1-8_x33513	169	-27.47	2	19	1657	1680	0.8333
			mghv-miR-M1-8_x1864	164	-28.07	2	18	1657	1679	0.8235
			mghv-miR-M1-10-AS-3p_x3	169	-22.05	2	22	1577	1599	0.75
Aph1b	NM_177583	1	mghv-miR-M1-10-5p_x12	160	-16.76	2	20	2081	2102	0.8
Aph1c	NM_026674	3	mghv-miR-M1-2-5p_x110	161	-26.78	2	20	3721	3740	0.7778
			mghv-miR-M1-8*_x129	166	-20.18	2	21	309	329	0.7368
			mghv-miR-M1-8-AS-5p_x8	161	-17.07	2	18	4151	4172	0.75
Aplf	NM_001170489	1	mghv-miR-M1-8_x254	162	-24.48	2	23	982	1004	0.7273
Aplnr	NM_011784	1	mghv-miR-M1-12_x85	162	-26.36	2	20	1759	1783	0.7368
Apobec3	NM_001160415	1	mghv-miR-M1-2-5p_x6528	163	-29.12	2	22	707	728	0.75
Apol6	NM_001163621	5	mghv-miR-M1-2-5p_x5697	184	-34.31	2	21	651	674	0.8421
			mghv-miR-M1-2-5p_x9704	179	-34.8	2	20	651	673	0.8333
			mghv-miR-M1-2-5p_x590	174	-33.33	2	19	651	672	0.8235
			mghv-miR-M1-2-5p_x110	164	-27.22	2	17	650	670	0.8
			mghv-miR-M1-7-5p_x16	162	-23.04	2	23	724	747	0.6667
Apold1	NM_001109914	1	mghv-miR-M1-10_x122	167	-22.24	2	21	132	157	0.6957
Appl2	NM_145220	1	mghv-miR-M1-12*_x10	161	-21.59	2	18	109	131	0.8125
Aptx	NM_001025444	1	mghv-miR-M1-6*_x46	169	-20.76	2	18	1894	1915	0.875
Aqp1	NM_007472	2	mghv-miR-M1-2-5p_x590	162	-28.18	2	20	89	112	0.75
			mghv-miR-M1-3_x1229	164	-29.67	2	20	1518	1540	0.7895
Aqp2	NM_009699	1	mghv-miR-M1-2_x4	161	-30.15	2	15	293	315	0.9286
Aqp4	NM_009700	1	mghv-miR-M1-1_x1342	164	-19.97	2	21	1421	1442	0.7368
Aqp9	NM_022026	1	mghv-miR-M1-13_x133	161	-18.49	2	21	515	539	0.7727
Arcn1	NM_145985	1	mghv-miR-M1-1_x1342	167	-19.31	2	21	952	974	0.75
Arf1	NM_001130408	3	mghv-miR-M1-2-5p_x6528	181	-32.12	2	22	1	23	0.85
			mghv-miR-M1-2-5p_x5697	176	-32.92	2	21	1	22	0.8421
			mghv-miR-M1-2-5p_x9704	171	-29.49	2	20	1	21	0.8333
Arf3	NM_007478	2	mghv-miR-M1-5_x63444	161	-20.83	2	19	1083	1104	0.7778
			mghv-miR-M1-13-5p_x2701	168	-27.39	2	17	1499	1520	0.8667
Arf6	NM_007481	1	mghv-miR-M1-13-5p_x2701	166	-20.74	2	19	317	338	0.7647
Arfgap1	NM_001177706	1	mghv-miR-M1-10-5p_x78	161	-20.12	2	18	202	223	0.8125
Arfgap2	NM_001166024	1	mghv-miR-M1-9-5p_x18	166	-18.94	2	19	1388	1410	0.7647
Arfgef2	NM_001085495	4	mghv-miR-M1-8_x1482	167	-30.48	2	22	2384	2405	0.8
			mghv-miR-M1-8_x33513	167	-32.79	2	22	2383	2404	0.8
			mghv-miR-M1-8_x1864	162	-28.97	2	21	2383	2403	0.7895
			mghv-miR-M1-8-AS-5p_x8	168	-27.6	2	21	2383	2404	0.7895
Arfip2	NM_029802	1	mghv-miR-M1-2-5p_x110	161	-25.12	2	20	266	285	0.7778
Arhgap10	NM_030113	1	mghv-miR-M1-2-5p_x5697	160	-31.91	2	23	376	398	0.7143
Arhgap20	NM_175535	1	mghv-miR-M1-1_x1342	164	-21.93	2	18	516	539	0.7778
Arhgap23	NM_021493	1	mghv-miR-M1-1*_x18	162	-21.57	2	19	595	616	0.7059
Arhgap24	NM_029270	1	mghv-miR-M1-6*_x58	161	-27.32	2	19	69	93	0.75
Arhgap26	NM_175164	2	mghv-miR-M1-8-AS-5p_x8	163	-22.51	2	21	5061	5085	0.7273
			mghv-miR-M1-10-5p_x78	168	-16.66	2	21	1240	1261	0.7895
Arhgap27	NM_001205236	1	mghv-miR-M1-8_x33513	164	-29.72	2	17	1208	1230	0.7333
Arhgap27	NM_183288	1	mghv-miR-M1-13_x133	161	-22.49	2	22	225	247	0.65
Arhgap31	NM_020260	2	mghv-miR-M1-2-5p_x9704	160	-21.79	2	22	495	518	0.619
			mghv-miR-M1-3_x1229	165	-26.34	2	22	919	941	0.7
Arhgap32	NM_001195632	3	mghv-miR-M1-8_x1482	173	-30.54	2	22	1944	1966	0.75
			mghv-miR-M1-8_x33513	168	-30.44	2	21	1943	1965	0.7368
			mghv-miR-M1-8_x1864	163	-26.62	2	20	1943	1964	0.7222
Arhgap44	NM_001099288	1	mghv-miR-M1-1*_x18	160	-17.16	2	21	1132	1153	0.6842
Arhgap5	NM_009706	1	mghv-miR-M1-10-AS-3p_x3	164	-18.3	2	21	252	274	0.7368
Arhgap6	NM_009707	1	mghv-miR-M1-9_x57	166	-18.9	2	21	1010	1030	0.7895
Arhgdia	NM_133796	2	mghv-miR-M1-7-5p_x16	162	-25.2	2	23	329	350	0.7143
			mghv-miR-M1-9_x57	161	-23.05	2	15	950	972	0.9286
Arhgef17	NM_001081116	1	mghv-miR-M1-13-5p_x2701	160	-17.24	2	21	1723	1744	0.6842
Arhgef18	NM_133962	2	mghv-miR-M1-7-5p_x16	164	-25.12	2	17	710	733	0.8667
			mghv-miR-M1-10-5p_x12	162	-16.82	2	19	1103	1123	0.7647
Arhgef2	NM_001198911	1	mghv-miR-M1-2-5p_x5697	160	-25.37	2	17	437	460	0.8
Arhgef3	NM_027871	1	mghv-miR-M1-8_x33513	164	-28.94	2	22	1795	1818	0.6667
Arhgef37	NM_177828	1	mghv-miR-M1-5*_x390	165	-28.33	2	19	774	796	0.7778
Arhgef4	NM_183019	1	mghv-miR-M1-8-AS-3p_x2	160	-19.94	2	21	645	666	0.6842
Arhgef6	NM_152801	1	mghv-miR-M1-6_x852	162	-18.3	2	15	1308	1330	0.9231
Arhgef7	NM_001113518	1	mghv-miR-M1-5_x63444	161	-18.78	2	20	1423	1442	0.7778
Arhgef9	NM_001033329	2	mghv-miR-M1-2-5p_x590	167	-32.47	2	21	2566	2588	0.75
			mghv-miR-M1-13-5p_x2701	174	-30.1	2	21	660	680	0.8421
Arid3a	NM_007880	2	mghv-miR-M1-9_x57	163	-21.41	2	16	2610	2631	0.7857
			mghv-miR-M1-14-5p_x634	166	-24.93	2	19	551	572	0.7647
Arid3b	NM_019689	1	mghv-miR-M1-2_x4	160	-26.59	2	21	1638	1659	0.6842
Arid5a	NM_001172205	3	mghv-miR-M1-8_x1864	163	-28.52	2	21	876	898	0.65
			mghv-miR-M1-10-5p_x78	173	-24.82	2	19	690	712	0.8889
			mghv-miR-M1-10-AS-5p_x1	161	-14.06	2	19	689	712	0.7778
Arih1	NM_019927	2	mghv-miR-M1-13_x133	167	-21.9	2	21	1804	1828	0.7143
			mghv-miR-M1-14-5p_x94	172	-26.11	2	17	3794	3814	0.8667
Arih2	NM_011790	1	mghv-miR-M1-2-5p_x5697	162	-32.49	2	23	1784	1804	0.7143
Arl14	NM_027843	1	mghv-miR-M1-6*_x58	167	-18.15	2	20	84	105	0.7778
Arl2	NM_019722	1	mghv-miR-M1-2-5p_x110	162	-25.93	2	17	63	82	0.8667
Arl2bp	NM_024191	1	mghv-miR-M1-8-AS-5p_x8	160	-22.17	2	20	681	700	0.7222
Arl4a	NM_001039515	1	mghv-miR-M1-9_x57	167	-21.43	2	21	1488	1510	0.75
Arl4c	NM_177305	4	mghv-miR-M1-2_x4	171	-37.03	2	16	1119	1140	0.9286
			mghv-miR-M1-8_x1482	164	-32.8	2	22	29	52	0.7143
			mghv-miR-M1-8_x33513	164	-34.65	2	22	28	51	0.7143
			mghv-miR-M1-8-AS-5p_x8	160	-19.73	2	17	1670	1691	0.7333
Arl4d	NM_025404	1	mghv-miR-M1-2_x4	162	-23.85	2	21	369	389	0.7895
Arl5b	NM_029466	1	mghv-miR-M1-3_x1229	160	-21.62	2	21	593	615	0.6316
Arl5c	NM_207231	1	mghv-miR-M1-8_x1864	161	-23.77	2	21	30	49	0.7368
Arl6ip5	NM_022992	1	mghv-miR-M1-2-5p_x5697	164	-25.65	2	21	35	58	0.6316
Arl6ip6	NM_022989	1	mghv-miR-M1-8_x1482	160	-19.44	2	1900-01-21	1231	1253	0.6316
Armc1	NM_028840	1	mghv-miR-M1-7-5p_x16	170	-25.17	2	23	900	923	0.7143
Armc2	NM_001034858	1	mghv-miR-M1-10-5p_x12	164	-22.68	2	19	1341	1364	0.8
Armc8	NM_028768	1	mghv-miR-M1-12*_x10	166	-27.4	2	20	1794	1818	0.75
Armc9	NM_030184	3	mghv-miR-M1-3_x1229	166	-29.05	2	21	878	899	0.7895
			mghv-miR-M1-8_x1864	160	-26.1	2	19	361	384	0.7895
			mghv-miR-M1-13-5p_x2701	160	-23.1	2	17	407	428	0.8
Armcx6	NM_001007578	1	mghv-miR-M1-8_x254	162	-26.54	2	19	59	82	0.7059
Arnt	NM_001037737	1	mghv-miR-M1-8*_x129	163	-20.86	2	18	798	818	0.8125
Arnt2	NM_007488	2	mghv-miR-M1-2-5p_x590	160	-24.21	2	21	2879	2900	0.6842
			mghv-miR-M1-3_x1229	160	-21.82	2	17	3187	3209	0.8
Arpc5	NM_026369	1	mghv-miR-M1-1*_x18	170	-24.05	2	20	437	459	0.8421
Arpm1	NM_029690	1	mghv-miR-M1-10-5p_x12	166	-16.99	2	19	47	67	0.7647
Arpp21	NM_001177615	2	mghv-miR-M1-2-5p_x9704	162	-25.09	2	22	2300	2322	0.7619
			mghv-miR-M1-10-AS-3p_x3	160	-20.35	2	21	2709	2731	0.7368
Arrb1	NM_177231	2	mghv-miR-M1-8_x1864	161	-25	2	19	710	733	0.7368
			mghv-miR-M1-13-5p_x2701	166	-25.29	2	20	1927	1949	0.7895
Arrb2	NM_145429	1	mghv-miR-M1-1_x1342	168	-22.39	2	21	356	377	0.7368
Arrdc2	NM_027560	1	mghv-miR-M1-14-5p_x94	161	-21.18	2	20	259	278	0.7778
Arrdc4	NM_001042592	1	mghv-miR-M1-9_x57	169	-19.78	2	20	1517	1537	0.8333
Arsb	NM_009712	1	mghv-miR-M1-2-5p_x590	160	-29.19	2	19	48	68	0.7647
Arsj	NM_173451	1	mghv-miR-M1-8-AS-5p_x8	172	-22.6	2	21	244	265	0.7368
Art4	NM_026639	2	mghv-miR-M1-1*_x18	162	-22.96	2	16	365	387	0.8667
			mghv-miR-M1-1*_x18	160	-21.67	2	20	36	61	0.7727
Artn	NM_009711	1	mghv-miR-M1-8_x1482	160	-31.05	2	22	115	141	0.625
Arvcf	NM_033474	2	mghv-miR-M1-1*_x18	163	-21.33	2	21	1088	1111	0.6667
			mghv-miR-M1-9-5p_x18	172	-24.4	2	21	570	592	0.7895
Asap3	NM_001008232	1	mghv-miR-M1-8_x33513	160	-25.17	2	22	2407	2430	0.6667
Asb1	NM_001039126	2	mghv-miR-M1-8_x33513	160	-25.81	2	22	1388	1412	0.6818
			mghv-miR-M1-8-AS-5p_x8	163	-25.6	2	21	1388	1412	0.6818
Asb7	NM_080443	1	mghv-miR-M1-7-5p_x16	168	-23.27	2	23	927	952	0.7391
Asb8	NM_001170710	3	mghv-miR-M1-8_x254	160	-21.28	2	22	424	449	0.6364
			mghv-miR-M1-10-AS-5p_x1	164	-17.99	2	21	879	901	0.7368
			mghv-miR-M1-14-5p_x94	160	-22.68	2	20	581	601	0.7895
Ascc1	NM_001199187	2	mghv-miR-M1-2-5p_x6528	165	-27.21	2	22	123	145	0.65
			mghv-miR-M1-2-5p_x5697	161	-29.32	2	23	120	144	0.6818
Ascc3	NM_198007	1	mghv-miR-M1-6*_x46	164	-22.75	2	21	257	278	0.7368
Asna1	NM_019652	1	mghv-miR-M1-2_x4	176	-39.37	2	21	90	111	0.7895
Asph	NM_001177856	1	mghv-miR-M1-1_x1342	164	-17.27	2	19	617	637	0.8235
Asxl3	NM_001167777	1	mghv-miR-M1-6_x852	160	-16.41	2	22	2673	2696	0.619
Atad2b	NM_001099628	2	mghv-miR-M1-8_x33513	160	-22.34	2	21	2197	2219	0.6316
			mghv-miR-M1-10_x122	167	-20.04	2	21	972	994	0.7
Atcay	NM_178662	1	mghv-miR-M1-1_x1342	163	-20.79	2	21	2018	2041	0.7143
Ate1	NM_001136054	2	mghv-miR-M1-8_x1864	166	-24.65	2	19	1383	1404	0.8235
			mghv-miR-M1-14-5p_x94	164	-21.65	2	20	643	661	0.8333
Atf1	NM_007497	1	mghv-miR-M1-6*_x58	162	-22.81	2	16	574	597	0.875
Atf2	NM_001025093	1	mghv-miR-M1-13-5p_x2701	162	-25.77	2	21	320	340	0.7368
Atf6	NM_001081304	2	mghv-miR-M1-1*_x18	172	-27.3	2	21	280	301	0.7895
			mghv-miR-M1-13-5p_x2701	172	-31.15	2	19	1348	1368	0.8824
Atf7	NM_146065	1	mghv-miR-M1-10-5p_x12	163	-19.66	2	16	365	385	0.8571
Atg12	NM_026217	2	mghv-miR-M1-1_x1342	160	-14.55	2	17	670	691	0.8
			mghv-miR-M1-2-5p_x110	161	-26.75	2	20	208	227	0.7778
Atg13	NM_145528	2	mghv-miR-M1-10-AS-5p_x1	161	-18.87	2	21	663	685	0.8
			mghv-miR-M1-14-5p_x94	160	-21.75	2	19	1459	1478	0.8235
Atg16l2	NM_001111111	1	mghv-miR-M1-2_x4	164	-26.98	2	21	74	95	0.7368
Atg2b	NM_029654	1	mghv-miR-M1-2-5p_x590	168	-25.23	2	21	2262	2283	0.7368
Atg5	NM_053069	1	mghv-miR-M1-4_x32	163	-21.89	2	20	1	19	0.6667
Atg7	NM_001253717	1	mghv-miR-M1-2-5p_x9704	163	-26.28	2	21	384	409	0.7273
Atg9a	NM_001003917	1	mghv-miR-M1-14-5p_x94	165	-21	2	20	407	426	0.8333
Atl3	NM_001163505	2	mghv-miR-M1-14-5p_x634	166	-30.56	2	21	4252	4275	0.8095
			mghv-miR-M1-14-5p_x94	161	-31.84	2	20	4252	4274	0.8
Atmin	NM_177700	1	mghv-miR-M1-2-5p_x9704	167	-24.73	2	22	1294	1318	0.7273
Atoh1	NM_007500	1	mghv-miR-M1-12_x85	163	-20.4	2	20	449	472	0.7222
Atp10a	NM_009728	1	mghv-miR-M1-9_x57	171	-22.66	2	21	10	32	0.8
Atp11c	NM_001001798	1	mghv-miR-M1-3_x1229	161	-28.82	2	22	353	379	0.75
Atp13a3	NM_001128094	1	mghv-miR-M1-6_x852	162	-20.84	2	22	2753	2773	0.7
Atp2b1	NM_026482	1	mghv-miR-M1-10-AS-5p_x1	163	-14.74	2	22	1191	1215	0.7727
Atp2b4	NM_213616	1	mghv-miR-M1-10-AS-5p_x1	164	-13.06	2	22	480	503	0.7619
Atp4b	NM_009724	1	mghv-miR-M1-2-5p_x590	166	-28.9	2	21	127	147	0.7895
Atp5a1	NM_007505	1	mghv-miR-M1-12*_x10	163	-18.59	2	17	193	216	0.875
Atp5s	NM_026536	1	mghv-miR-M1-2-5p_x590	170	-30.13	2	20	648	670	0.7895
Atp6v0c	NM_009729	2	mghv-miR-M1-2-5p_x5697	162	-26.26	2	22	430	453	0.7143
			mghv-miR-M1-14-5p_x634	162	-23.54	2	20	40	62	0.7895
Atp6v1b2	NM_007509	2	mghv-miR-M1-2-5p_x590	160	-24.66	2	21	992	1011	0.7368
			mghv-miR-M1-8_x1482	163	-26.37	2	20	71	93	0.7778
Atp6v1g1	NM_024173	1	mghv-miR-M1-13_x133	160	-18.64	2	17	16	38	0.7333
Atp8b1	NM_001001488	2	mghv-miR-M1-2-5p_x6528	161	-29.2	2	22	365	385	0.75
			mghv-miR-M1-9_x57	163	-20.09	2	21	2196	2220	0.7273
Atp9b	NM_001201569	1	mghv-miR-M1-8_x1482	161	-22.58	2	22	853	875	0.7
Atpaf1	NM_181040	1	mghv-miR-M1-8_x254	165	-25.29	2	19	782	807	0.7368
Atpaf2	NM_145427	1	mghv-miR-M1-9-5p_x18	165	-23.66	2	22	445	467	0.7
Atpbd4	NM_025675	2	mghv-miR-M1-8_x254	161	-24.31	2	23	1523	1548	0.6087
			mghv-miR-M1-13-5p_x2701	160	-24.39	2	21	503	524	0.5789
Atrnl1	NM_181415	1	mghv-miR-M1-8_x1864	162	-27.7	2	20	145	168	0.7
Atrx	NM_009530	1	mghv-miR-M1-13-5p_x2701	172	-27.01	2	21	1052	1073	0.7895
Atxn1	NM_001199304	1	mghv-miR-M1-1_x1342	168	-17.97	2	21	1845	1866	0.7368
Atxn10	NM_016843	2	mghv-miR-M1-3_x1229	167	-27.12	2	22	170	194	0.7273
			mghv-miR-M1-14_x106	160	-19.48	2	21	860	881	0.7368
Atxn3	NM_029705	1	mghv-miR-M1-14-5p_x94	167	-26.1	2	20	1496	1514	0.8889
Atxn7l1	NM_028139	1	mghv-miR-M1-8*_x129	160	-14.98	2	21	445	466	0.7368
Atxn7l3	NM_001098836	1	mghv-miR-M1-14-5p_x94	161	-21.45	2	14	557	577	0.9167
AU018091	NM_001004153	1	mghv-miR-M1-8_x254	161	-32.55	2	16	1031	1053	0.9286
AU021092	NM_001033220	1	mghv-miR-M1-7-3p_x86	160	-14.98	2	22	38	61	0.7143
AU023871	NM_001033221	2	mghv-miR-M1-2-5p_x5697	168	-29.8	2	23	417	443	0.7083
			mghv-miR-M1-2-5p_x9704	163	-30.29	2	22	417	442	0.6957
Aurka	NM_011497	1	mghv-miR-M1-2_x4	1900-06-17	-31.1	2	18	226	247	0.8125
AV320801	NM_177918	2	mghv-miR-M1-10-AS-5p_x1	161	-14.32	2	21	68	88	0.7368
			mghv-miR-M1-10-AS-5p_x1	161	-14.32	2	21	68	88	0.7368
Avil	NM_009635	1	mghv-miR-M1-2-5p_x110	174	-33.29	2	20	321	343	0.85
Avpr1a	NM_016847	2	mghv-miR-M1-2_x4	162	-28.12	2	21	895	915	0.7895
			mghv-miR-M1-14-5p_x94	165	-29.2	2	20	836	859	0.8095
AW146154	NM_001033530	1	mghv-miR-M1-10_x122	168	-19.9	2	21	9	30	0.6842
AW549877	NM_145930	2	mghv-miR-M1-3_x1229	161	-24.92	2	14	727	749	0.9167
			mghv-miR-M1-6_x852	160	-18.24	2	17	836	858	0.8
AW551984	NM_001199556	1	mghv-miR-M1-8*_x129	166	-17.96	2	19	904	925	0.8235
AW554918	NM_001033532	2	mghv-miR-M1-2-5p_x590	163	-29.15	2	21	2187	2209	0.75
			mghv-miR-M1-2-5p_x590	161	-24.89	2	20	3090	3110	0.7778
Azi2	NM_001048146	1	mghv-miR-M1-6*_x58	164	-18.1	2	21	122	143	0.7368
B020004J07Rik	NM_001033790	1	mghv-miR-M1-1_x1342	162	-16.99	2	21	172	192	0.7895
B230120H23Rik	NM_001164791	1	mghv-miR-M1-14_x106	163	-18.63	2	21	3591	3613	0.75
B230312A22Rik	NM_001253353	1	mghv-miR-M1-3_x1229	163	-22.52	2	22	846	867	0.75
B3galt1	NM_020283	1	mghv-miR-M1-6_x852	163	-21.4	2	21	3020	3043	0.7
B3galt2	NM_020025	1	mghv-miR-M1-2-5p_x9704	161	-20.33	2	22	2518	2540	0.7
B3galtl	NM_001081204	1	mghv-miR-M1-2_x4	172	-33.6	2	21	896	917	0.7895
B3gnt6	NM_001081167	1	mghv-miR-M1-10-AS-5p_x1	160	-15.75	2	18	678	701	0.8235
B4galt1	NM_022305	1	mghv-miR-M1-8_x1482	166	-28.54	2	20	128	152	0.75
B4galt5	NM_019835	1	mghv-miR-M1-10-5p_x78	163	-18.94	2	18	2503	2523	0.875
B4galt6	NM_019737	1	mghv-miR-M1-2-5p_x5697	164	-27.36	2	22	158	182	0.7619
B630005N14Rik	NM_175312	1	mghv-miR-M1-6_x852	168	-20.97	2	22	472	495	0.7143
B930041F14Rik	NM_178699	1	mghv-miR-M1-7-5p_x16	162	-24.97	2	19	431	452	0.8824
B9d2	NM_172148	1	mghv-miR-M1-2-5p_x590	163	-31.6	2	21	126	148	0.7
Baat1	NM_172724	1	mghv-miR-M1-8_x1864	163	-30.77	2	21	1609	1631	0.65
Bace1	NM_001145947	1	mghv-miR-M1-10-AS-5p_x1	160	-16.99	2	22	1417	1440	0.7143
Bace2	NM_019517	1	mghv-miR-M1-9-5p_x18	179	-32.16	2	20	71	93	0.8333
Bach2	NM_001109661	2	mghv-miR-M1-2-5p_x6528	162	-27.5	2	22	3331	3353	0.7619
			mghv-miR-M1-7-5p_x16	164	-23.29	2	17	1627	1650	0.8667
Bahcc1	NM_198423	1	mghv-miR-M1-6_x852	171	-24.29	2	18	1398	1419	0.9375
Bahd1	NM_001045523	1	mghv-miR-M1-1*_x18	162	-19.66	2	19	932	953	0.7647
Baiap3	NM_001163270	1	mghv-miR-M1-2-5p_x590	161	-28.59	2	19	559	581	0.7222
Bak1	NM_007523	2	mghv-miR-M1-2-5p_x6528	166	-24	2	19	535	557	0.8235
			mghv-miR-M1-7-5p_x16	162	-20.08	2	22	933	956	0.7619
Bambi	NM_026505	1	mghv-miR-M1-2-5p_x9704	168	-25.81	2	21	2369	2391	0.7895
Banf1	NM_001038231	1	mghv-miR-M1-6_x852	164	-23.22	2	19	20	44	0.8421
Bard1	NM_007525	1	mghv-miR-M1-2-5p_x9704	163	-25.84	2	16	2015	2037	0.8571
Baz1a	NM_013815	2	mghv-miR-M1-9_x57	162	-17.18	2	21	1155	1175	0.7368
			mghv-miR-M1-14_x106	165	-23.07	2	19	467	489	0.7778
Baz1b	NM_011714	1	mghv-miR-M1-14_x106	166	-18.36	2	19	1145	1166	0.8235
Bbc3	NM_133234	1	mghv-miR-M1-3_x1229	160	-25.37	2	18	551	574	0.7647
Bbox1	NM_130452	1	mghv-miR-M1-13-5p_x2701	163	-24.14	2	21	124	148	0.7273
Bbs1	NM_001033128	2	mghv-miR-M1-2-5p_x6528	163	-21.01	2	22	1327	1348	0.7
			mghv-miR-M1-4_x32	163	-19.86	2	21	185	207	0.75
Bbs4	NM_175325	1	mghv-miR-M1-2_x4	161	-25.73	2	15	23	45	0.9286
Bbx	NM_027444	1	mghv-miR-M1-14-5p_x94	162	-23.21	2	19	114	134	0.7647
BC003965	NM_183150	2	mghv-miR-M1-2-5p_x5697	162	-25.32	2	15	487	510	0.9231
			mghv-miR-M1-8_x254	160	-23.41	2	22	1360	1384	0.619
BC004004	NM_030561	3	mghv-miR-M1-2-5p_x5697	166	-32.9	2	17	642	664	0.9333
			mghv-miR-M1-2-5p_x9704	161	-33.39	2	16	642	663	0.9286
			mghv-miR-M1-10-5p_x12	161	-19.75	2	19	1252	1274	0.7368
BC016579	NM_145389	1	mghv-miR-M1-13_x133	166	-15.14	2	19	196	218	0.8235
BC017158	NM_145590	1	mghv-miR-M1-9_x57	166	-15.27	2	21	1109	1129	0.7895
BC017643	NM_001252548	5	mghv-miR-M1-4_x56	168	-24.81	2	19	1054	1075	0.8824
			mghv-miR-M1-4_x32	163	-25.61	2	18	1054	1074	0.875
			mghv-miR-M1-8_x254	161	-28.27	2	23	244	270	0.625
			mghv-miR-M1-8_x1482	173	-29.93	2	22	427	449	0.7
			mghv-miR-M1-8_x33513	168	-29.83	2	21	426	448	0.6842
BC017647	NM_145430	1	mghv-miR-M1-14_x106	164	-18.44	2	21	1919	1940	0.7368
BC018242	NM_144935	3	mghv-miR-M1-2-5p_x5697	168	-29.8	2	22	1200	1225	0.7273
			mghv-miR-M1-4_x32	163	-25.39	2	17	23	45	0.8125
			mghv-miR-M1-8_x1864	162	-29.61	2	21	564	588	0.7273
BC021785	NM_001113388	1	mghv-miR-M1-14-5p_x94	165	-23.41	2	19	2066	2088	0.7895
BC022687	NM_145450	1	mghv-miR-M1-2-5p_x9704	163	-26.41	2	21	307	330	0.75
BC023829	NM_001033328	1	mghv-miR-M1-2-5p_x110	163	-25.47	2	20	33	51	0.8333
BC024659	NM_001135577	2	mghv-miR-M1-10-AS-3p_x3	174	-25.37	2	19	3180	3202	0.8235
			mghv-miR-M1-12*_x10	160	-12.74	2	22	341	365	0.7273
BC026590	NM_001081420	2	mghv-miR-M1-4_x56	161	-16.82	2	21	3401	3421	0.7895
			mghv-miR-M1-13-5p_x2701	163	-21.37	2	21	794	816	0.75
BC027231	NM_145972	1	mghv-miR-M1-8_x1482	160	-18.47	2	21	166	188	0.6316
BC030336	NM_001164580	2	mghv-miR-M1-10_x122	165	-24.25	2	19	2448	2470	0.7778
			mghv-miR-M1-10-AS-3p_x3	163	-17.38	2	22	2583	2608	0.6957
BC031781	NM_145943	2	mghv-miR-M1-3_x1229	169	-27.4	2	22	1455	1477	0.65
			mghv-miR-M1-8_x33513	163	-23.72	2	22	1658	1679	0.7
BC051070	NM_178412	1	mghv-miR-M1-14-5p_x1936	160	-27.2	2	22	31	49	0.75
BC051665	NM_199148	1	mghv-miR-M1-9_x57	163	-19.14	2	16	138	159	0.8571
BC052040	NM_001145898	3	mghv-miR-M1-2-5p_x6528	168	-27.75	2	22	637	660	0.7143
			mghv-miR-M1-2-5p_x5697	163	-28.35	2	21	635	659	0.7
			mghv-miR-M1-3_x1229	160	-20.93	2	22	545	568	0.6667
BC055111	NM_183182	2	mghv-miR-M1-2-5p_x6528	160	-27.13	2	22	563	586	0.619
			mghv-miR-M1-2-5p_x5697	160	-28.26	2	22	561	585	0.619
BC096441	NM_001034097	1	mghv-miR-M1-14-5p_x94	160	-21.05	2	13	252	272	1
Bcar1	NM_001198839	1	mghv-miR-M1-9-5p_x18	160	-22.22	2	21	250	272	0.7368
Bcas3	NM_001166642	1	mghv-miR-M1-7-5p_x16	160	-20.65	2	21	130	153	0.7368
Bcdin3d	NM_029236	1	mghv-miR-M1-12_x85	163	-20.94	2	21	304	328	0.75
Bche	NM_009738	1	mghv-miR-M1-2-5p_x6528	160	-26.67	2	22	3138	3161	0.6667
Bckdk	NM_009739	1	mghv-miR-M1-13-5p_x2701	161	-22.84	2	19	536	559	0.7368
Bcl11b	NM_001079883	3	mghv-miR-M1-2-5p_x5697	166	-30.51	2	23	1865	1886	0.8095
			mghv-miR-M1-2-5p_x9704	161	-29.77	2	22	1865	1885	0.8
			mghv-miR-M1-3_x1229	163	-24.31	2	22	4154	4175	0.75
Bcl2	NM_009741	1	mghv-miR-M1-2-5p_x6528	167	-28.4	2	20	790	812	0.7222
Bcl2l1	NM_009743	1	mghv-miR-M1-7-5p_x16	160	-18.18	2	21	658	681	0.6842
Bcl2l11	NM_009754	3	mghv-miR-M1-2-5p_x6528	161	-28.61	2	22	2462	2482	0.75
			mghv-miR-M1-14-5p_x634	165	-22.74	2	18	2304	2325	0.75
			mghv-miR-M1-14-5p_x94	160	-24.07	2	17	2304	2324	0.7333
Bcl2l2	NM_007537	2	mghv-miR-M1-2-5p_x5697	164	-27.48	2	22	1785	1805	0.8
			mghv-miR-M1-5*_x390	165	-27.74	2	21	1761	1783	0.8095
Bcl6b	NM_007528	3	mghv-miR-M1-2-5p_x5697	178	-27.1	2	23	752	775	0.7143
			mghv-miR-M1-2-5p_x9704	173	-27.59	2	22	752	774	0.7
			mghv-miR-M1-2-5p_x590	168	-26.12	2	21	752	773	0.6842
Bcmo1	NM_001163028	1	mghv-miR-M1-14-5p_x94	173	-26.62	2	20	254	273	0.8889
Bcorl1	NM_178782	1	mghv-miR-M1-8_x254	165	-24.16	2	21	376	397	0.7368
Bdh1	NM_001122683	2	mghv-miR-M1-2-5p_x6528	164	-30.24	2	22	1276	1299	0.6667
			mghv-miR-M1-2-5p_x110	161	-20.69	2	18	1418	1438	0.75
Bdkrb2	NM_009747	1	mghv-miR-M1-6_x852	163	-28.45	2	21	326	351	0.6818
Bend4	NM_001164806	5	mghv-miR-M1-1_x1342	164	-21.01	2	18	5873	5896	0.7778
			mghv-miR-M1-9_x57	163	-15.68	2	21	4110	4132	0.75
			mghv-miR-M1-10-5p_x78	161	-20.69	2	18	2091	2112	0.8125
			mghv-miR-M1-10-AS-5p_x1	165	-16.78	2	18	2090	2112	0.8125
			mghv-miR-M1-12_x85	170	-27.27	2	20	2080	2104	0.7895
Bfsp2	NM_001002896	1	mghv-miR-M1-14_x106	165	-18.8	2	18	149	170	0.8125
Bgn	NM_007542	1	mghv-miR-M1-2-5p_x5697	165	-28.63	2	18	95	118	0.8125
Bhlha15	NM_010800	1	mghv-miR-M1-7-5p_x16	161	-22.25	2	18	1306	1329	0.8125
Bhmt2	NM_022884	2	mghv-miR-M1-2-5p_x590	162	-28.22	2	21	902	927	0.7391
			mghv-miR-M1-8_x1482	169	-25.88	2	22	394	416	0.7
Bicd2	NM_001039179	3	mghv-miR-M1-2-5p_x6528	165	-26.17	2	22	1661	1683	0.75
			mghv-miR-M1-2-5p_x5697	165	-29.18	2	22	1659	1682	0.75
			mghv-miR-M1-2-5p_x9704	1900-06-08	-25.75	2	21	1659	1681	0.7368
Bin3	NM_021328	1	mghv-miR-M1-3_x1229	161	-23.74	2	22	588	610	0.65
Birc2	NM_007465	1	mghv-miR-M1-12*_x10	161	-17.8	2	18	321	343	0.75
Birc7	NM_001163247	1	mghv-miR-M1-8_x33513	161	-26.94	2	19	44	67	0.7222
Blk	NM_007549	1	mghv-miR-M1-10-AS-3p_x3	173	-23.94	2	22	371	393	0.8
Blmh	NM_178645	1	mghv-miR-M1-8_x254	160	-24.87	2	22	618	643	0.6818
Blzf1	NM_001160208	1	mghv-miR-M1-2_x4	164	-25.26	2	21	2289	2310	0.7368
Bmp2	NM_007553	1	mghv-miR-M1-2-5p_x5697	164	-27.46	2	22	37	63	0.7391
Bmp8b	NM_007559	3	mghv-miR-M1-2-5p_x5697	176	-36.96	2	23	363	389	0.7917
			mghv-miR-M1-2-5p_x9704	171	-36.65	2	22	363	388	0.7826
			mghv-miR-M1-2-5p_x590	166	-35.18	2	21	363	387	0.7727
Bmper	NM_028472	3	mghv-miR-M1-8_x254	168	-29.84	2	23	496	518	0.6667
			mghv-miR-M1-8_x1482	163	-30.64	2	22	496	517	0.65
			mghv-miR-M1-13_x133	167	-18.93	2	22	474	495	0.75
Bmpr1a	NM_009758	1	mghv-miR-M1-2-5p_x110	160	-30.47	2	13	2157	2177	1
Bmpr1b	NM_007560	3	mghv-miR-M1-8_x33513	165	-24.31	2	22	63	85	0.7
			mghv-miR-M1-8_x1864	160	-24.91	2	21	63	84	0.6842
			mghv-miR-M1-10-5p_x78	162	-21.46	2	21	610	634	0.6818
Bms1	NM_194339	1	mghv-miR-M1-2_x4	166	-28.51	2	15	1	16	0.9231
Bnc2	NM_172870	6	mghv-miR-M1-1*_x18	167	-25.79	2	20	1320	1341	0.7222
			mghv-miR-M1-2-5p_x110	160	-21.84	2	17	1	19	0.8
			mghv-miR-M1-8-AS-5p_x8	162	-21.65	2	19	2853	2874	0.6471
			mghv-miR-M1-10-5p_x78	179	-22.25	2	20	562	583	0.8333
			mghv-miR-M1-10-AS-5p_x1	167	-15.55	2	20	561	583	0.7222
			mghv-miR-M1-14-5p_x94	161	-20.44	2	19	1766	1787	0.7222
Bnip3l	NM_009761	1	mghv-miR-M1-13-5p_x2701	165	-25.49	2	21	1049	1068	0.7895
Bnipl	NM_001168356	1	mghv-miR-M1-10_x122	163	-19.01	2	16	283	304	0.8571
Bok	NM_016778	1	mghv-miR-M1-2_x4	163	-30.15	2	17	544	566	0.875
Bop1	NM_013481	1	mghv-miR-M1-14-5p_x94	175	-24.2	2	20	120	140	0.8333
Bpi	NM_177850	1	mghv-miR-M1-2-5p_x5697	160	-24.44	2	23	237	264	0.68
Bpifc	NM_177772	1	mghv-miR-M1-2_x4	160	-30.35	2	19	176	196	0.8235
Braf	NM_139294	1	mghv-miR-M1-3_x1229	162	-26.39	2	20	634	657	0.7368
Brap	NM_028227	1	mghv-miR-M1-1*_x18	163	-22.24	2	20	159	180	0.7222
Brcc3	NM_001166457	1	mghv-miR-M1-8_x33513	160	-21.38	2	19	934	959	0.75
Brd3	NM_001113573	1	mghv-miR-M1-14_x106	162	-23.24	2	21	1063	1083	0.7895
Brd4	NM_020508	2	mghv-miR-M1-2-5p_x6528	161	-25.01	2	19	199	222	0.7222
			mghv-miR-M1-8_x1864	168	-30	2	21	854	875	0.6842
Bri3bp	NM_029752	1	mghv-miR-M1-10-AS-3p_x3	162	-18.96	2	22	398	418	0.75
Brip1	NM_178309	1	mghv-miR-M1-13_x133	162	-20.32	2	22	1170	1192	0.7619
Brix1	NM_026396	1	mghv-miR-M1-14-5p_x634	163	-19.57	2	20	41	62	0.6667
Brpf3	NM_001081315	1	mghv-miR-M1-2-5p_x5697	161	-26.27	2	20	1407	1429	0.7778
Brsk1	NM_001003920	1	mghv-miR-M1-2-5p_x9704	161	-25.11	2	22	332	354	0.65
Bsdc1	NM_133889	2	mghv-miR-M1-2-5p_x9704	166	-26.26	2	20	4	27	0.7895
			mghv-miR-M1-14-5p_x94	166	-22.43	2	19	102	122	0.7647
Bspry	NM_138653	2	mghv-miR-M1-2-5p_x6528	169	-28.42	2	20	106	127	0.8333
			mghv-miR-M1-2-5p_x5697	164	-29.22	2	19	104	126	0.8235
Btaf1	NM_001080706	1	mghv-miR-M1-10_x122	166	-16.02	2	21	1290	1310	0.7895
Btbd11	NM_001017525	1	mghv-miR-M1-10-5p_x78	162	-18.2	2	20	607	629	0.6842
Btbd3	NM_001025431	1	mghv-miR-M1-9_x57	168	-16.29	2	21	1570	1591	0.7895
Btbd9	NM_027060	1	mghv-miR-M1-2-5p_x5697	162	-28.39	2	20	3158	3182	0.6842
Btd	NM_025295	1	mghv-miR-M1-13-5p_x2701	160	-23.88	2	21	195	216	0.7368
Btf3l4	NM_027453	2	mghv-miR-M1-1*_x18	163	-21.32	2	16	609	630	0.8571
			mghv-miR-M1-6_x852	169	-20.92	2	22	1071	1093	0.65
Btg1	NM_007569	2	mghv-miR-M1-7-5p_x16	161	-24.47	2	23	3465	3492	0.64
			mghv-miR-M1-13-5p_x2701	162	-27.95	2	21	3484	3504	0.7368
Btla	NM_001037719	2	mghv-miR-M1-3_x1229	171	-25.83	2	20	1482	1504	0.8333
			mghv-miR-M1-13-5p_x2701	176	-29.65	2	21	184	205	0.7895
Btrc	NM_001037758	2	mghv-miR-M1-8_x254	167	-26.3	2	20	3693	3716	0.7778
			mghv-miR-M1-8_x1482	162	-27.1	2	19	3693	3715	0.7647
Bysl	NM_016859	1	mghv-miR-M1-7-5p_x16	163	-24.01	2	18	436	458	0.875
Bzrap1	NM_172449	1	mghv-miR-M1-5*_x390	174	-32.21	2	21	870	890	0.8421
C030046E11Rik	NM_001081319	1	mghv-miR-M1-7-5p_x16	165	-20.8	2	23	1655	1679	0.7273
C030048B08Rik	NM_172991	1	mghv-miR-M1-8_x254	160	-27.24	2	23	91	113	0.6667
C130039O16Rik	NM_001163501	1	mghv-miR-M1-13_x133	167	-20.23	2	22	1921	1942	0.75
C130079G13Rik	NM_177661	1	mghv-miR-M1-8_x254	162	-26.37	2	23	431	452	0.6667
C1galt1	NM_052993	1	mghv-miR-M1-8_x1864	165	-27.91	2	18	53	74	0.75
C1qa	NM_007572	1	mghv-miR-M1-2-5p_x6528	171	-34.43	2	22	46	67	0.75
C1ql3	NM_153155	2	mghv-miR-M1-2-5p_x6528	167	-31.85	2	17	1611	1634	0.875
			mghv-miR-M1-2-5p_x5697	167	-34.49	2	23	1610	1633	0.7727
C1qtnf1	NM_001204129	1	mghv-miR-M1-9-5p_x18	173	-32.87	2	22	809	831	0.75
C1qtnf3	NM_001204134	1	mghv-miR-M1-10-5p_x78	162	-19.27	2	20	69	91	0.7368
C1qtnf5	NM_001040631	1	mghv-miR-M1-1*_x18	167	-25.87	2	20	109	130	0.7778
C1qtnf9	NM_183175	1	mghv-miR-M1-6_x852	165	-19.52	2	22	670	692	0.7
C1s	NM_001097617	1	mghv-miR-M1-10_x122	160	-13.86	2	21	528	549	0.6842
C230081A13Rik	NM_172924	3	mghv-miR-M1-2-5p_x5697	164	-28.23	2	17	4601	4624	0.7333
			mghv-miR-M1-7-5p_x16	162	-22.85	2	21	21	43	0.7368
			mghv-miR-M1-8_x1482	160	-28.67	2	22	1122	1145	0.6667
C2cd2l	NM_027909	1	mghv-miR-M1-2-5p_x590	160	-28.24	2	21	551	572	0.6316
C2cd4a	NM_001163143	1	mghv-miR-M1-8-AS-3p_x2	160	-19.34	2	21	125	146	0.7368
C2cd4c	NM_001168624	1	mghv-miR-M1-2-5p_x6528	162	-23.79	2	19	5167	5189	0.7647
C330018D20Rik	NM_029909	1	mghv-miR-M1-8_x254	171	-23.89	2	22	1188	1210	0.8
C330019G07Rik	NM_194340	2	mghv-miR-M1-9_x57	164	-16.57	2	21	3559	3580	0.7368
			mghv-miR-M1-13-5p_x2701	163	-26.21	2	16	2513	2534	0.8571
C430048L16Rik	NM_198957	1	mghv-miR-M1-2-5p_x590	163	-25.79	2	20	30	51	0.7222
C530028O21Rik	NM_001145926	1	mghv-miR-M1-3_x1229	164	-27.44	2	18	957	980	0.7647
C5ar1	NM_001173550	2	mghv-miR-M1-9_x57	169	-19.29	2	21	777	796	0.8421
			mghv-miR-M1-13_x133	168	-19.54	2	22	1251	1274	0.7143
C77080	NM_001033189	1	mghv-miR-M1-10-5p_x78	161	-19.37	2	19	1551	1575	0.75
C77370	NM_001077354	2	mghv-miR-M1-6_x852	173	-23.46	2	22	2349	2371	0.7
			mghv-miR-M1-10-5p_x12	162	-18.72	2	19	2515	2535	0.7647
C8a	NM_146148	1	mghv-miR-M1-8_x1864	162	-27.71	2	21	1636	1660	0.7273
Cab39	NM_133781	1	mghv-miR-M1-14_x106	164	-19.9	2	18	1457	1479	0.8235
Cabp5	NM_013877	1	mghv-miR-M1-2-5p_x5697	164	-29.35	2	22	547	571	0.7143
Cacna1c	NM_001159533	1	mghv-miR-M1-10-5p_x78	165	-23.32	2	18	559	580	0.8125
Cacna1d	NM_001083616	1	mghv-miR-M1-10-AS-3p_x3	170	-23.32	2	22	1509	1529	0.75
Cacna1e	NM_009782	1	mghv-miR-M1-6*_x58	162	-17.2	2	20	2338	2360	0.7895
Cacna1i	NM_001044308	1	mghv-miR-M1-14_x106	166	-20.66	2	20	1936	1958	0.7895
Cacna2d2	NM_001174047	1	mghv-miR-M1-3_x1229	164	-28.07	2	21	678	700	0.6842
Cacna2d4	NM_001033382	3	mghv-miR-M1-6*_x58	164	-20.75	2	21	430	451	0.7368
			mghv-miR-M1-8_x1482	167	-30.29	2	21	2002	2027	0.6818
			mghv-miR-M1-8_x33513	162	-30.19	2	20	2001	2026	0.6667
Cacng5	NM_001199301	1	mghv-miR-M1-2-5p_x5697	160	-25.27	2	22	40	64	0.6667
Cadm2	NM_001145977	2	mghv-miR-M1-2-5p_x590	161	-19.9	2	20	4920	4940	0.7222
			mghv-miR-M1-10-AS-5p_x1	163	-20.48	2	17	2238	2261	0.875
Cadm3	NM_053199	3	mghv-miR-M1-2-5p_x6528	173	-32.31	2	22	1667	1689	0.7
			mghv-miR-M1-2-5p_x5697	168	-34.02	2	21	1665	1688	0.6842
			mghv-miR-M1-2-5p_x9704	163	-30.59	2	20	1665	1687	0.6667
Cadps2	NM_001252107	2	mghv-miR-M1-3_x1229	162	-24.62	2	20	210	233	0.7368
			mghv-miR-M1-8_x1864	170	-25.61	2	19	532	553	0.8235
Cadps2	NM_001252105	1	mghv-miR-M1-1_x1342	162	-18.5	2	19	364	385	0.7647
Calb2	NM_007586	1	mghv-miR-M1-2-5p_x5697	163	-31.7	2	23	313	336	0.7273
Calcr	NM_001042725	1	mghv-miR-M1-9_x57	161	-18.81	2	19	1488	1510	0.7778
Calcrl	NM_018782	1	mghv-miR-M1-14-5p_x94	166	-22.73	2	19	337	357	0.7647
Calm2	NM_007589	1	mghv-miR-M1-8*_x129	168	-19.29	2	21	255	276	0.7368
Calm3	NM_007590	1	mghv-miR-M1-2-5p_x9704	163	-26.03	2	21	818	841	0.7
Calu	NM_007594	1	mghv-miR-M1-10-5p_x12	160	-12.73	2	20	1082	1102	0.7895
Camk1d	NM_177343	4	mghv-miR-M1-2-5p_x6528	162	-31.49	2	20	2285	2308	0.7368
			mghv-miR-M1-7-5p_x16	172	-27.55	2	23	2877	2899	0.7619
			mghv-miR-M1-8_x1482	162	-23.53	2	20	2514	2537	0.7895
			mghv-miR-M1-14-5p_x734	160	-28.07	2	19	790	815	0.7895
Camk2a	NM_009792	3	mghv-miR-M1-8_x33513	171	-22.26	2	22	1061	1082	0.8
			mghv-miR-M1-8_x1864	166	-22.86	2	21	1061	1081	0.7895
			mghv-miR-M1-8-AS-5p_x8	172	-21.37	2	21	1061	1082	0.7895
Camk2b	NM_001174053	1	mghv-miR-M1-2-5p_x110	162	-24.12	2	20	1949	1970	0.7895
Camk2n1	NM_025451	2	mghv-miR-M1-1*_x18	176	-21.86	2	21	441	462	0.7895
			mghv-miR-M1-6*_x46	168	-25.07	2	21	210	231	0.7368
Camk2n2	NM_028420	2	mghv-miR-M1-2-5p_x6528	160	-24.62	2	22	308	331	0.7143
			mghv-miR-M1-8_x1482	162	-29.9	2	21	931	957	0.6957
Camk4	NM_009793	4	mghv-miR-M1-2_x4	160	-22.94	2	21	1888	1909	0.7368
			mghv-miR-M1-2-5p_x110	161	-25.41	2	18	381	401	0.75
			mghv-miR-M1-12_x85	162	-26.97	2	23	8926	8949	0.6667
			mghv-miR-M1-14_x106	167	-16.2	2	20	7375	7396	0.7778
Camkk2	NM_001199676	1	mghv-miR-M1-14-5p_x94	162	-25.65	2	20	2391	2412	0.7368
Camkv	NM_145621	2	mghv-miR-M1-2-5p_x9704	160	-27.13	2	22	325	348	0.7143
			mghv-miR-M1-6_x852	160	-20.58	2	20	249	271	0.7368
Camsap2	NM_001081360	1	mghv-miR-M1-1_x1342	164	-11.68	2	21	1278	1299	0.7368
Camta1	NM_001081557	1	mghv-miR-M1-13_x133	160	-17.29	2	22	1947	1970	0.619
Camta2	NM_001190376	1	mghv-miR-M1-7-5p_x16	166	-31.47	2	23	400	421	0.7619
Capn1	NM_001110504	1	mghv-miR-M1-2-5p_x6528	160	-30.44	2	22	367	391	0.7273
Capn11	NM_001013767	1	mghv-miR-M1-2-5p_x6528	166	-29.06	2	22	141	164	0.7727
Capn5	NM_007602	1	mghv-miR-M1-2-5p_x5697	160	-32.31	2	23	1336	1358	0.619
Capn7	NM_009796	1	mghv-miR-M1-8_x254	174	-25.8	2	23	308	331	0.7619
Caprin1	NM_001111289	1	mghv-miR-M1-10-5p_x12	161	-17.07	2	19	960	982	0.7895
Caprin1	NM_001111291	1	mghv-miR-M1-10_x122	163	-12.92	2	21	664	686	0.7
Capza1	NM_009797	2	mghv-miR-M1-2-5p_x110	166	-25.55	2	20	439	461	0.75
			mghv-miR-M1-8_x33513	160	-31.51	2	22	926	950	0.6364
Capza2	NM_007604	1	mghv-miR-M1-8_x1864	162	-28.59	2	21	69	89	0.7368
Car7	NM_053070	3	mghv-miR-M1-10-5p_x78	163	-23.53	2	21	134	156	0.75
			mghv-miR-M1-10-AS-5p_x1	168	-16.21	2	22	133	156	0.7619
			mghv-miR-M1-12*_x10	163	-21.8	2	20	162	184	0.7222
Card6	NM_001163138	1	mghv-miR-M1-13-5p_x2701	160	-20.13	2	21	34	55	0.6316
Carm1	NM_021531	5	mghv-miR-M1-2-5p_x6528	160	-28.35	2	22	638	661	0.6667
			mghv-miR-M1-3_x1229	161	-22.96	2	20	404	425	0.7778
			mghv-miR-M1-6_x852	160	-12.85	2	21	1005	1027	0.6842
			mghv-miR-M1-7-5p_x16	169	-23.62	2	22	1197	1220	0.75
			mghv-miR-M1-13_x133	161	-14.9	2	18	216	238	0.75
Casd1	NM_145398	1	mghv-miR-M1-10-AS-5p_x1	167	-20.93	2	20	840	862	0.7222
Cask	NM_009806	1	mghv-miR-M1-6_x852	162	-20.25	2	20	3354	3377	0.7368
Caskin1	NM_027937	2	mghv-miR-M1-2_x4	176	-36.32	2	21	1390	1411	0.7895
			mghv-miR-M1-3_x1229	162	-23.93	2	21	1114	1135	0.6842
Casp14	NM_009809	1	mghv-miR-M1-2-5p_x6528	161	-28.67	2	18	1199	1221	0.8125
Casp2	NM_007610	2	mghv-miR-M1-6_x852	169	-23.77	2	22	1668	1690	0.65
			mghv-miR-M1-13_x133	163	-19.51	2	22	487	508	0.75
Casp8	NM_001080126	1	mghv-miR-M1-2-5p_x110	160	-25.35	2	18	301	323	0.7222
Cass4	NM_001033538	1	mghv-miR-M1-10-5p_x78	160	-15.9	2	19	490	510	0.8235
Cbfa2t3	NM_001109873	2	mghv-miR-M1-2-5p_x5697	162	-28.25	2	20	4903	4929	0.7143
			mghv-miR-M1-2-5p_x9704	162	-26.07	2	21	3419	3440	0.7368
Cblb	NM_001033238	3	mghv-miR-M1-2-5p_x5697	168	-26.85	2	23	228	250	0.7143
			mghv-miR-M1-2-5p_x9704	163	-26.11	2	22	228	249	0.7
			mghv-miR-M1-9_x57	160	-16.31	2	21	545	566	0.7368
Cbll1	NM_001253847	5	mghv-miR-M1-8_x254	180	-33.83	2	21	678	701	0.7895
			mghv-miR-M1-8_x1482	175	-32.36	2	20	678	700	0.7778
			mghv-miR-M1-8_x33513	170	-30.05	2	19	677	699	0.7647
			mghv-miR-M1-8_x1864	165	-26.23	2	18	677	698	0.75
			mghv-miR-M1-10-5p_x12	162	-12.89	2	19	900	920	0.7647
Cbln3	NM_019820	3	mghv-miR-M1-6*_x58	164	-18.25	2	21	3600	3621	0.7368
			mghv-miR-M1-6*_x46	167	-26.38	2	21	2581	2605	0.7727
			mghv-miR-M1-12_x85	161	-21.74	2	23	2004	2029	0.6957
Cbx2	NM_007623	1	mghv-miR-M1-8_x1864	171	-29.32	2	20	627	648	0.7778
Cbx3	NM_007624	1	mghv-miR-M1-8-AS-5p_x8	160	-21.55	2	20	867	886	0.7778
Cbx4	NM_007625	3	mghv-miR-M1-2-5p_x6528	160	-27.25	2	19	1987	2008	0.8235
			mghv-miR-M1-10-5p_x12	165	-18.2	2	18	3216	3236	0.8125
			mghv-miR-M1-10-5p_x78	160	-17.41	2	17	3214	3235	0.8
Cbx5	NM_001076789	3	mghv-miR-M1-2-5p_x5697	169	-28.9	2	23	7995	8020	0.7391
			mghv-miR-M1-2-5p_x9704	164	-28.16	2	22	7995	8019	0.7273
			mghv-miR-M1-2-5p_x110	169	-26.95	2	20	7532	7551	0.7778
Cbx6	NM_028763	2	mghv-miR-M1-2-5p_x6528	163	-23.58	2	20	1661	1683	0.7222
			mghv-miR-M1-7-5p_x16	162	-27.45	2	15	3080	3103	0.9231
Cbx7	NM_144811	2	mghv-miR-M1-2-5p_x6528	164	-30.12	2	22	1670	1693	0.6667
			mghv-miR-M1-2-5p_x6528	161	-25.98	2	22	1092	1114	0.65
Ccbe1	NM_178793	5	mghv-miR-M1-2-5p_x110	160	-30.42	2	13	2058	2078	1
			mghv-miR-M1-10-5p_x12	171	-22.96	2	20	264	284	0.8333
			mghv-miR-M1-10-5p_x78	171	-21.79	2	20	262	283	0.8333
			mghv-miR-M1-10-5p_x78	162	-21.91	2	21	4242	4266	0.7727
			mghv-miR-M1-10-AS-5p_x1	163	-14.27	2	20	261	283	0.7222
Ccdc103	NM_028492	1	mghv-miR-M1-14-5p_x1936	161	-22.78	2	21	864	886	0.75
Ccdc116	NM_001164606	1	mghv-miR-M1-9-5p_x18	167	-19.6	2	20	398	420	0.7222
Ccdc117	NM_134033	3	mghv-miR-M1-8_x1482	164	-26.55	2	21	1029	1051	0.6842
			mghv-miR-M1-8_x33513	160	-26.49	2	22	1027	1050	0.7143
			mghv-miR-M1-8_x33513	160	-20.14	2	22	2036	2062	0.625
Ccdc127	NM_001168658	2	mghv-miR-M1-8_x1482	164	-29.66	2	22	2467	2491	0.6364
			mghv-miR-M1-8_x33513	164	-29.6	2	22	2466	2490	0.6364
Ccdc137	NM_152807	1	mghv-miR-M1-12_x85	173	-28.62	2	23	348	372	0.7727
Ccdc141	NM_001025576	2	mghv-miR-M1-2-5p_x9704	167	-25.25	2	20	67	89	0.7778
			mghv-miR-M1-2-5p_x590	162	-26.05	2	19	67	88	0.7647
Ccdc147	NM_001163267	1	mghv-miR-M1-13_x133	165	-18.06	2	22	455	477	0.7
Ccdc148	NM_001001178	1	mghv-miR-M1-12_x85	164	-24.35	2	17	1572	1595	0.8
Ccdc21	NM_144527	1	mghv-miR-M1-4_x32	160	-25.27	2	19	561	581	0.7647
Ccdc25	NM_145944	1	mghv-miR-M1-8_x1482	162	-26.41	2	21	1301	1322	0.7368
Ccdc38	NM_175488	1	mghv-miR-M1-12_x85	165	-21.91	2	19	1615	1640	0.7895
Ccdc43	NM_025918	1	mghv-miR-M1-10_x122	164	-12.78	2	21	757	778	0.6842
Ccdc50	NM_001025615	5	mghv-miR-M1-2-5p_x6528	160	-30.21	2	22	4241	4264	0.7143
			mghv-miR-M1-2-5p_x5697	165	-31.72	2	23	4239	4263	0.7273
			mghv-miR-M1-2-5p_x9704	160	-28.29	2	22	4239	4262	0.7143
			mghv-miR-M1-10-AS-5p_x1	168	-18.21	2	21	4135	4157	0.7895
			mghv-miR-M1-10-AS-5p_x1	161	-19.65	2	22	4081	4103	0.65
Ccdc57	NM_027745	1	mghv-miR-M1-7-5p_x16	165	-30.49	2	23	14	42	0.6923
Ccdc59	NM_025602	1	mghv-miR-M1-8_x1864	163	-22.66	2	20	245	266	0.6667
Ccdc6	NM_001111121	3	mghv-miR-M1-2-5p_x6528	160	-24.24	2	22	293	316	0.7143
			mghv-miR-M1-2-5p_x9704	160	-28.33	2	21	669	689	0.7368
			mghv-miR-M1-13-5p_x2701	160	-27.22	2	21	2174	2198	0.7826
Ccdc69	NM_177471	1	mghv-miR-M1-2-5p_x6528	161	-29.64	2	22	112	132	0.75
Ccdc71	NM_133744	1	mghv-miR-M1-6*_x58	168	-22.56	2	21	152	173	0.7368
Ccdc82	NM_025534	1	mghv-miR-M1-13_x133	162	-20.32	2	22	1964	1986	0.7619
Ccdc85a	NM_001166662	1	mghv-miR-M1-9_x57	166	-24.61	2	21	175	198	0.7619
Ccdc85b	NM_001243307	3	mghv-miR-M1-1_x1342	160	-16.69	2	21	2853	2874	0.6842
			mghv-miR-M1-2-5p_x9704	176	-32.59	2	21	587	609	0.7895
			mghv-miR-M1-2-5p_x590	171	-33.19	2	20	587	608	0.7778
Ccdc90a	NM_001081059	2	mghv-miR-M1-2-5p_x9704	164	-25.82	2	22	56	79	0.7619
			mghv-miR-M1-6_x852	160	-19.91	2	22	2323	2347	0.6818
Ccdc92	NM_144819	1	mghv-miR-M1-6*_x46	166	-25.02	2	20	571	594	0.75
Ccdc96	NM_025725	1	mghv-miR-M1-5*_x390	162	-22.43	2	16	1533	1555	0.8667
Ccdc97	NM_028771	2	mghv-miR-M1-6*_x46	164	-19.87	2	17	1691	1712	0.8667
			mghv-miR-M1-7-5p_x16	164	-23.25	2	17	366	389	0.8
Cckar	NM_009827	1	mghv-miR-M1-1_x1342	163	-22.54	2	21	77	95	0.8421
Cckbr	NM_007627	1	mghv-miR-M1-13_x133	161	-20.46	2	20	11	32	0.7778
Ccl22	NM_009137	1	mghv-miR-M1-3_x1229	163	-25.08	2	20	90	112	0.7222
Ccnd2	NM_009829	2	mghv-miR-M1-2-5p_x5697	163	-27.85	2	23	4061	4084	0.7727
			mghv-miR-M1-8_x1482	168	-27.65	2	21	3603	3625	0.7368
Ccnd3	NM_001081635	1	mghv-miR-M1-10_x122	162	-20.06	2	20	422	444	0.7368
Ccne1	NM_007633	1	mghv-miR-M1-8_x254	172	-25.31	2	21	211	234	0.7895
Ccng2	NM_007635	1	mghv-miR-M1-8_x1864	164	-21.62	2	21	1130	1151	0.7368
Ccnj	NM_172839	3	mghv-miR-M1-6*_x58	164	-21.84	2	18	1024	1046	0.8235
			mghv-miR-M1-8_x33513	164	-21.79	2	22	2374	2398	0.7273
			mghv-miR-M1-8-AS-5p_x8	162	-20.48	2	21	2374	2398	0.7273
Ccno	NM_001081062	1	mghv-miR-M1-13-5p_x2701	167	-26.4	2	20	242	263	0.7222
Ccnt2	NM_028399	2	mghv-miR-M1-1_x1342	162	-18.87	2	21	882	905	0.7619
			mghv-miR-M1-13-5p_x2701	166	-24.66	2	19	978	999	0.7647
Ccny	NM_026484	1	mghv-miR-M1-8_x254	173	-24.17	2	23	1380	1405	0.6957
Ccr1	NM_009912	1	mghv-miR-M1-10-5p_x12	161	-14.89	2	19	69	90	0.7778
Ccr2	NM_009915	1	mghv-miR-M1-9-5p_x18	168	-23.99	2	22	753	776	0.7143
Cd164	NM_016898	1	mghv-miR-M1-8-AS-5p_x8	162	-23.55	2	19	1666	1687	0.5882
Cd180	NM_008533	1	mghv-miR-M1-9_x57	161	-19.41	2	21	14	33	0.7368
Cd200r4	NM_207244	1	mghv-miR-M1-10-AS-3p_x3	160	-15.54	2	18	60	84	0.7778
Cd209a	NM_133238	1	mghv-miR-M1-7-5p_x16	164	-25.08	2	22	231	256	0.6818
Cd209e	NM_130905	1	mghv-miR-M1-6_x852	172	-20.32	2	21	691	713	0.7895
Cd22	NM_001043317	1	mghv-miR-M1-14-5p_x1936	160	-23.59	2	21	623	645	0.7368
Cd247	NM_001113391	1	mghv-miR-M1-2-5p_x6528	165	-26.27	2	22	54	76	0.75
Cd28	NM_007642	1	mghv-miR-M1-12_x85	176	-27.78	2	21	716	739	0.8421
Cd2bp2	NM_027353	1	mghv-miR-M1-8-AS-5p_x8	162	-22.2	2	19	1814	1835	0.7059
Cd300e	NM_172050	2	mghv-miR-M1-8_x254	169	-26.36	2	23	787	811	0.6818
			mghv-miR-M1-8_x1482	164	-24.89	2	22	787	810	0.6667
Cd300lb	NM_199221	1	mghv-miR-M1-10_x122	160	-11.3	2	21	1840	1861	0.6842
Cd33	NM_001111058	2	mghv-miR-M1-3_x1229	161	-27.74	2	15	113	136	0.9286
			mghv-miR-M1-9-5p_x18	163	-20.12	2	17	831	854	0.875
Cd38	NM_007646	2	mghv-miR-M1-7-5p_x16	162	-23.73	2	23	1560	1583	0.619
			mghv-miR-M1-8_x1482	160	-23.8	2	13	1385	1407	1
Cd3e	NM_007648	1	mghv-miR-M1-2-5p_x6528	160	-26.95	2	22	729	752	0.7143
Cd5	NM_007650	2	mghv-miR-M1-1*_x18	160	-21.42	2	21	102	123	0.6842
			mghv-miR-M1-14-5p_x94	167	-20.89	2	20	117	137	0.7778
Cd53	NM_007651	2	mghv-miR-M1-6_x852	160	-12.74	2	21	551	573	0.6316
			mghv-miR-M1-9-5p_x18	160	-16.64	2	21	1298	1320	0.6842
Cd59a	NM_001111060	3	mghv-miR-M1-6*_x58	160	-19.13	2	21	741	759	0.7895
			mghv-miR-M1-8_x1482	168	-30.93	2	22	334	359	0.6522
			mghv-miR-M1-8_x33513	163	-31.1	2	21	333	358	0.6364
Cd7	NM_009854	1	mghv-miR-M1-2-5p_x5697	162	-26.61	2	23	94	117	0.619
Cd74	NM_001042605	1	mghv-miR-M1-2-5p_x6528	160	-25.31	2	22	373	396	0.6667
Cd83	NM_009856	1	mghv-miR-M1-8_x254	161	-31.52	2	23	242	262	0.7143
Cd84	NM_001252472	1	mghv-miR-M1-9_x57	167	-19.89	2	20	2680	2701	0.7222
Cd84	NM_013489	1	mghv-miR-M1-10-AS-3p_x3	163	-19.62	2	18	254	275	0.8125
Cd8b1	NM_009858	1	mghv-miR-M1-6_x852	164	-19.44	2	22	402	425	0.6667
Cd99l2	NM_001199349	1	mghv-miR-M1-6_x852	166	-24.92	2	19	2155	2177	0.7647
Cdadc1	NM_001168535	2	mghv-miR-M1-8_x254	168	-29.39	2	22	532	557	0.6364
			mghv-miR-M1-8_x1482	163	-29.72	2	21	532	556	0.619
Cdc123	NM_133837	1	mghv-miR-M1-7-5p_x16	162	-23.73	2	23	390	413	0.619
Cdc27	NM_145436	2	mghv-miR-M1-6_x852	164	-20.22	2	21	2016	2038	0.6842
			mghv-miR-M1-8_x254	161	-23.31	2	18	938	961	0.6875
Cdc37	NM_016742	1	mghv-miR-M1-8_x33513	163	-28.85	2	21	1206	1229	0.65
Cdc37l1	NM_025950	2	mghv-miR-M1-2-5p_x9704	164	-24.18	2	21	223	245	0.7368
			mghv-miR-M1-8_x1482	164	-22.62	2	21	678	700	0.6842
Cdc42bpa	NM_001033285	1	mghv-miR-M1-2_x4	167	-28.02	2	20	1341	1362	0.7778
Cdc42se1	NM_172395	1	mghv-miR-M1-13-5p_x2701	160	-22.81	2	20	1037	1058	0.7895
Cdc6	NM_001025779	3	mghv-miR-M1-5*_x390	161	-25.7	2	21	755	776	0.8
			mghv-miR-M1-6*_x46	166	-25.47	2	20	2455	2477	0.7895
			mghv-miR-M1-13_x133	161	-19.08	2	22	1587	1609	0.65
Cdca7	NM_025866	1	mghv-miR-M1-7-5p_x16	170	-25.77	2	23	199	222	0.7143
Cdh12	NM_001008420	1	mghv-miR-M1-2-5p_x110	168	-27.61	2	18	92	113	0.8824
Cdh19	NM_001081386	1	mghv-miR-M1-10_x122	180	-24.95	2	21	241	262	0.7895
Cdh3	NM_001037809	1	mghv-miR-M1-2-5p_x9704	164	-27.17	2	21	861	883	0.6316
Cdh4	NM_009867	2	mghv-miR-M1-10_x122	161	-15.11	2	18	3186	3207	0.6875
			mghv-miR-M1-10-5p_x78	166	-18.42	2	20	1803	1825	0.7895
Cdh5	NM_009868	1	mghv-miR-M1-2-5p_x110	169	-23.15	2	19	267	288	0.8333
Cdk12	NM_001109626	1	mghv-miR-M1-6_x852	161	-13.15	2	22	2702	2724	0.6
Cdk14	NM_011074	2	mghv-miR-M1-2-5p_x5697	170	-28.66	2	23	2230	2253	0.7619
			mghv-miR-M1-9_x57	163	-19.38	2	20	2530	2551	0.7778
Cdk16	NM_011049	2	mghv-miR-M1-2-5p_x590	160	-28.69	2	19	116	136	0.8235
			mghv-miR-M1-7-5p_x16	164	-21.46	2	21	1082	1105	0.7368
Cdk17	NM_146239	2	mghv-miR-M1-1_x1342	160	-16.01	2	19	58	78	0.7647
			mghv-miR-M1-8-AS-5p_x8	164	-18.32	2	21	1350	1371	0.6842
Cdk19	NM_001168304	2	mghv-miR-M1-2-5p_x6528	165	-29.07	2	18	3765	3787	0.75
			mghv-miR-M1-14_x106	173	-26.66	2	20	288	308	0.8889
Cdk2	NM_016756	1	mghv-miR-M1-13-5p_x2701	160	-23.08	2	17	194	215	0.8
Cdk5	NM_007668	1	mghv-miR-M1-7-5p_x16	172	-26	2	23	833	858	0.7826
Cdk5r1	NM_009871	1	mghv-miR-M1-13-5p_x2701	166	-31.06	2	21	97	117	0.7895
Cdk7	NM_009874	3	mghv-miR-M1-3_x1229	166	-27.66	2	22	3157	3177	0.8
			mghv-miR-M1-3-5p_x176	161	-23.71	2	21	6298	6319	0.75
			mghv-miR-M1-12_x85	161	-22.6	2	19	4195	4219	0.7778
Cdk9	NM_130860	1	mghv-miR-M1-5*_x390	171	-28.88	2	21	592	614	0.8
Cdkl4	NM_001033443	2	mghv-miR-M1-1_x1342	166	-24.95	2	21	1381	1404	0.8095
			mghv-miR-M1-6*_x46	163	-17.91	2	20	455	476	0.7778
Cdkn1a	NM_001111099	1	mghv-miR-M1-13-5p_x2701	160	-24.32	2	18	32	54	0.7647
Cdkn2aip	NM_172407	1	mghv-miR-M1-8-AS-5p_x8	164	-20.4	2	19	1420	1440	0.8235
Cdnf	NM_177647	2	mghv-miR-M1-6_x852	169	-23.14	2	21	638	658	0.8421
			mghv-miR-M1-10-AS-5p_x1	163	-16.02	2	20	1143	1165	0.7222
Cdon	NM_021339	4	mghv-miR-M1-2-5p_x6528	168	-34.05	2	22	1190	1213	0.7143
			mghv-miR-M1-2-5p_x5697	168	-32.58	2	22	1188	1212	0.7143
			mghv-miR-M1-2-5p_x9704	165	-22.22	2	22	1197	1219	0.7
			mghv-miR-M1-9_x57	167	-22.44	2	21	2489	2511	0.75
Cdr2l	NM_001080929	1	mghv-miR-M1-2-5p_x590	167	-26.21	2	21	210	233	0.7619
Cds1	NM_173370	1	mghv-miR-M1-8_x1482	166	-30.96	2	22	1015	1035	0.7
Cds2	NM_138651	5	mghv-miR-M1-6_x852	169	-21.25	2	22	6388	6410	0.7
			mghv-miR-M1-8_x254	160	-22.25	2	22	5049	5073	0.6667
			mghv-miR-M1-8_x33513	160	-20.77	2	21	5977	5999	0.5789
			mghv-miR-M1-10-5p_x12	162	-21.4	2	20	3828	3849	0.7895
			mghv-miR-M1-10-5p_x78	161	-20.08	2	18	3515	3536	0.8125
Cdx1	NM_009880	1	mghv-miR-M1-2-5p_x6528	164	-24.63	2	21	597	619	0.7368
Cdyl	NM_001123386	3	mghv-miR-M1-2-5p_x6528	161	-25.76	2	22	381	403	0.65
			mghv-miR-M1-2-5p_x5697	161	-28.25	2	23	378	402	0.6818
			mghv-miR-M1-10-AS-3p_x3	160	-18.06	2	22	1087	1111	0.6364
Cdyl2	NM_029441	2	mghv-miR-M1-2-5p_x9704	167	-33.8	2	22	2246	2267	0.75
			mghv-miR-M1-13_x133	170	-20.25	2	19	3757	3779	0.8235
Ceacam1	NM_001039185	1	mghv-miR-M1-8_x254	164	-25.54	2	22	1745	1771	0.6957
Ceacam16	NM_001033419	1	mghv-miR-M1-3_x1229	163	-24.56	2	22	84	105	0.75
Ceacam2	NM_001113368	1	mghv-miR-M1-8_x254	164	-25.54	2	22	1695	1721	0.6957
Cebpd	NM_007679	2	mghv-miR-M1-13_x133	160	-14.16	2	22	1124	1147	0.6667
			mghv-miR-M1-14-5p_x94	163	-22.81	2	20	1056	1076	0.7222
Cebpg	NM_009884	2	mghv-miR-M1-1_x1342	164	-20.54	2	19	1607	1627	0.7647
			mghv-miR-M1-6*_x58	161	-21.09	2	20	740	760	0.7778
Cecr2	NM_001128151	2	mghv-miR-M1-2-5p_x5697	161	-27.02	2	18	4318	4341	0.75
			mghv-miR-M1-14-5p_x94	171	-22.52	2	20	2207	2227	0.7778
Cecr6	NM_033567	1	mghv-miR-M1-8_x1482	166	-25.11	2	19	2335	2357	0.7059
Celf1	NM_001244891	2	mghv-miR-M1-4_x56	160	-19.77	2	21	2411	2431	0.7895
			mghv-miR-M1-6_x852	164	-21.53	2	22	4953	4976	0.7143
Celf2	NM_001110228	1	mghv-miR-M1-9_x57	160	-17.41	2	17	1052	1073	0.8
Celf4	NM_001146292	1	mghv-miR-M1-14-5p_x734	162	-22.17	2	19	40	63	0.7647
Celf5	NM_176954	2	mghv-miR-M1-2_x4	171	-39.88	2	21	2404	2426	0.75
			mghv-miR-M1-2-5p_x9704	160	-26.79	2	22	265	288	0.6667
Celsr1	NM_009886	1	mghv-miR-M1-12_x85	170	-23.77	2	19	1151	1174	0.8235
Celsr2	NM_001004177	1	mghv-miR-M1-2-5p_x6528	163	-27.51	2	18	42	63	0.875
Cend1	NM_021316	1	mghv-miR-M1-8_x1482	167	-28.23	2	22	778	802	0.7273
Cep68	NM_172260	1	mghv-miR-M1-8_x1864	164	-22.29	2	21	1587	1608	0.6842
Cep72	NM_028959	1	mghv-miR-M1-8_x1864	164	-28.74	2	18	62	84	0.7647
Cep97	NM_028815	2	mghv-miR-M1-5*_x390	160	-18.22	2	17	4521	4542	0.8
			mghv-miR-M1-8*_x129	165	-20.32	2	18	4679	4700	0.75
Cetn2	NM_019405	1	mghv-miR-M1-8_x254	166	-25.12	2	22	408	429	0.8
Cflar	NM_009805	1	mghv-miR-M1-10_x122	174	-19.55	2	21	644	664	0.8421
Cflar	NM_207653	1	mghv-miR-M1-6*_x46	162	-19.06	2	21	3003	3023	0.7368
Cftr	NM_021050	1	mghv-miR-M1-9_x57	160	-12.19	2	21	1152	1173	0.6842
Cggbp1	NM_178647	1	mghv-miR-M1-14-5p_x94	167	-21.44	2	20	3262	3282	0.7222
Chaf1a	NM_013733	1	mghv-miR-M1-9_x57	169	-26.27	2	19	430	452	0.8333
Chd2	NM_001081345	1	mghv-miR-M1-1_x1342	160	-18.17	2	21	2549	2570	0.6842
Chd5	NM_001081376	1	mghv-miR-M1-2-5p_x110	160	-23.46	2	19	382	404	0.7895
Chd6	NM_173368	2	mghv-miR-M1-2-5p_x6528	160	-27.28	2	22	581	604	0.6667
			mghv-miR-M1-2-5p_x5697	160	-28.41	2	22	579	603	0.6667
Chd9	NM_177224	2	mghv-miR-M1-6*_x46	164	-22.74	2	18	2137	2159	0.8235
			mghv-miR-M1-14_x106	164	-20.67	2	21	418	439	0.7368
Chdh	NM_001136240	2	mghv-miR-M1-7-5p_x16	165	-22.27	2	23	2869	2893	0.6818
			mghv-miR-M1-14-5p_x1936	161	-25.16	2	22	1779	1801	0.7
Chfr	NM_172717	1	mghv-miR-M1-10-AS-5p_x1	160	-18.38	2	22	1008	1031	0.6667
Chid1	NM_001142681	2	mghv-miR-M1-13_x133	160	-14.34	2	21	586	608	0.6842
			mghv-miR-M1-14-5p_x734	165	-28.14	2	22	895	918	0.6
Chka	NM_001025566	1	mghv-miR-M1-14_x106	164	-17.38	2	17	1563	1584	0.8667
Chml	NM_021350	1	mghv-miR-M1-1_x1342	167	-20.3	2	21	2280	2302	0.75
Chmp3	NM_025783	1	mghv-miR-M1-12*_x10	175	-19.9	2	22	1456	1477	0.85
Chmp6	NM_001085498	1	mghv-miR-M1-1_x1342	164	-19.4	2	21	803	824	0.7368
Chn1	NM_001113246	2	mghv-miR-M1-1_x1342	163	-18.78	2	21	124	146	0.75
			mghv-miR-M1-6*_x58	160	-25.39	2	18	1871	1894	0.7778
Chn2	NM_001163640	1	mghv-miR-M1-12_x85	170	-25.5	2	19	1123	1146	0.7647
Chodl	NM_139134	2	mghv-miR-M1-2-5p_x5697	173	-28.54	2	22	108	131	0.65
			mghv-miR-M1-2-5p_x9704	168	-27.8	2	21	108	130	0.6316
Chrdl1	NM_001114385	1	mghv-miR-M1-6*_x58	160	-15.27	2	21	372	393	0.7368
Chrm1	NM_001112697	3	mghv-miR-M1-6*_x46	167	-28.56	2	20	428	449	0.7778
			mghv-miR-M1-8_x1482	161	-22.82	2	22	1227	1249	0.65
			mghv-miR-M1-13-5p_x2701	162	-21.23	2	21	3953	3973	0.6842
Chrm3	NM_033269	1	mghv-miR-M1-10-5p_x78	160	-16.06	2	21	535	556	0.7368
Chrm4	NM_007699	1	mghv-miR-M1-8_x33513	160	-21.82	2	21	890	912	0.6316
Chrna1	NM_007389	1	mghv-miR-M1-10-5p_x12	161	-16.64	2	18	519	539	0.8125
Chrna2	NM_144803	1	mghv-miR-M1-2-5p_x5697	162	-32.21	2	21	1698	1720	0.6842
Chrna4	NM_015730	1	mghv-miR-M1-2-5p_x5697	180	-34.29	2	22	1944	1968	0.8095
Chrnd	NM_021600	2	mghv-miR-M1-10-5p_x12	166	-16.23	2	19	734	754	0.8235
			mghv-miR-M1-14-5p_x1936	163	-24.89	2	18	22	46	0.8333
Chst10	NM_145142	1	mghv-miR-M1-8_x33513	161	-29.4	2	14	1179	1201	0.9167
Chst11	NM_021439	3	mghv-miR-M1-2-5p_x5697	169	-30.75	2	23	3019	3044	0.6957
			mghv-miR-M1-2-5p_x9704	164	-31.24	2	22	3019	3043	0.6818
			mghv-miR-M1-7-3p_x86	161	-23.26	2	22	203	225	0.65
Chst15	NM_029935	1	mghv-miR-M1-2-5p_x9704	164	-29.12	2	21	907	929	0.6316
Chst3	NM_016803	2	mghv-miR-M1-2-5p_x6528	160	-25.02	2	22	795	818	0.6667
			mghv-miR-M1-14-5p_x1936	160	-22.21	2	22	3368	3392	0.6364
Chst5	NM_019950	1	mghv-miR-M1-1*_x18	175	-25.5	2	20	220	241	0.8333
Ciapin1	NM_134141	1	mghv-miR-M1-2-5p_x6528	161	-25.57	2	22	2417	2439	0.7
Cidec	NM_178373	1	mghv-miR-M1-3_x1229	161	-19.65	2	22	83	105	0.7
Cirbp	NM_007705	1	mghv-miR-M1-6_x852	161	-19.22	2	22	595	617	0.55
Cklf	NM_001037841	1	mghv-miR-M1-6_x852	160	-19.93	2	21	944	966	0.6316
Clasp1	NM_001081276	3	mghv-miR-M1-1_x1342	161	-18.22	2	18	1663	1684	0.75
			mghv-miR-M1-10-AS-3p_x3	173	-19.2	2	22	744	766	0.7
			mghv-miR-M1-14-5p_x94	174	-25.07	2	19	1864	1884	0.8235
Clasp2	NM_001081960	1	mghv-miR-M1-7-5p_x16	160	-22.04	2	22	614	638	0.6667
Cldn1	NM_016674	1	mghv-miR-M1-8-AS-5p_x8	163	-20.31	2	20	1657	1678	0.7222
Cldn12	NM_001193659	1	mghv-miR-M1-1_x1342	161	-22.58	2	21	1952	1976	0.7727
Cldn4	NM_009903	1	mghv-miR-M1-2-5p_x6528	164	-26.99	2	22	720	743	0.6667
Cldn5	NM_013805	1	mghv-miR-M1-2-5p_x9704	161	-29.17	2	20	472	493	0.7778
Cldn6	NM_018777	2	mghv-miR-M1-2-5p_x9704	161	-32.27	2	22	637	657	0.75
			mghv-miR-M1-8_x33513	162	-24.01	2	21	143	167	0.7143
Cldn8	NM_018778	1	mghv-miR-M1-9_x57	166	-20.37	2	19	1353	1374	0.8235
Clec16a	NM_001204229	5	mghv-miR-M1-1*_x18	166	-25.35	2	21	568	592	0.7273
			mghv-miR-M1-2-5p_x6528	176	-33.09	2	22	972	995	0.8095
			mghv-miR-M1-2-5p_x5697	172	-33.42	2	22	970	994	0.7619
			mghv-miR-M1-2-5p_x9704	167	-29.99	2	21	970	993	0.75
			mghv-miR-M1-6_x852	172	-26.03	2	22	1183	1207	0.7273
Clec1a	NM_175526	1	mghv-miR-M1-14-5p_x94	161	-17.89	2	18	956	976	0.8125
Clec2h	NM_053165	1	mghv-miR-M1-6_x852	166	-25.37	2	22	766	788	0.7143
Clec4e	NM_019948	1	mghv-miR-M1-2-5p_x110	160	-21.25	2	17	1197	1217	0.8
Clec4f	NM_016751	1	mghv-miR-M1-3_x1229	162	-24.09	2	15	469	491	0.8462
Clec9a	NM_001205363	2	mghv-miR-M1-10-AS-3p_x3	163	-19.11	2	22	292	313	0.6
			mghv-miR-M1-13-5p_x2701	164	-23.62	2	21	1460	1479	0.8421
Clic4	NM_013885	2	mghv-miR-M1-2_x4	160	-24.74	2	21	663	684	0.6842
			mghv-miR-M1-2-5p_x110	160	-26.19	2	20	141	159	0.7778
Clic5	NM_172621	5	mghv-miR-M1-2_x4	160	-23.28	2	21	2789	2810	0.7368
			mghv-miR-M1-5_x63444	163	-22.19	2	16	127	147	0.8571
			mghv-miR-M1-8_x254	165	-27.41	2	22	1450	1473	0.7
			mghv-miR-M1-8_x1482	160	-27.74	2	21	1450	1472	0.6842
			mghv-miR-M1-13-5p_x2701	166	-27.19	2	20	58	82	0.7619
Clip2	NM_001039162	2	mghv-miR-M1-2-5p_x6528	161	-27.99	2	18	1295	1317	0.75
			mghv-miR-M1-7-5p_x16	168	-23.91	2	23	47	72	0.7826
Clmn	NM_001040682	2	mghv-miR-M1-8_x1864	164	-28.33	2	18	5565	5588	0.7778
			mghv-miR-M1-8_x1864	162	-30.98	2	21	3792	3815	0.7143
Cln8	NM_012000	4	mghv-miR-M1-8_x254	161	-26.04	2	23	1304	1328	0.6818
			mghv-miR-M1-8_x33513	160	-20.04	2	17	3169	3191	0.8
			mghv-miR-M1-8-AS-5p_x8	162	-27.71	2	21	3829	3854	0.7391
			mghv-miR-M1-8-AS-5p_x8	160	-22.43	2	21	3170	3191	0.7368
Clock	NM_007715	1	mghv-miR-M1-6_x852	168	-19.51	2	21	197	219	0.7368
Clpb	NM_009191	1	mghv-miR-M1-2-5p_x110	161	-24.9	2	14	1071	1091	0.9167
Clybl	NM_029556	1	mghv-miR-M1-2-5p_x6528	161	-25.26	2	22	115	135	0.75
Cma1	NM_010780	1	mghv-miR-M1-10-AS-5p_x1	161	-15.99	2	22	110	132	0.7
Cmc1	NM_026442	1	mghv-miR-M1-10-AS-3p_x3	165	-18.41	2	18	207	229	0.8125
Cmklr1	NM_008153	1	mghv-miR-M1-14-5p_x1936	167	-33.32	2	22	907	932	0.7391
Cml2	NM_053096	1	mghv-miR-M1-6_x852	169	-21.11	2	22	452	474	0.7
Cmpk2	NM_020557	4	mghv-miR-M1-8_x254	174	-31.3	2	23	475	498	0.7143
			mghv-miR-M1-8_x1482	169	-31.63	2	22	475	497	0.7
			mghv-miR-M1-8_x33513	164	-29.56	2	21	474	496	0.6842
			mghv-miR-M1-8-AS-5p_x8	167	-27.59	2	21	473	496	0.7143
Cmtm4	NM_153582	1	mghv-miR-M1-8-AS-5p_x8	162	-27.21	2	21	1808	1828	0.6842
Cnbp	NM_001109745	1	mghv-miR-M1-6*_x58	160	-25.03	2	20	1306	1328	0.8
Cnga3	NM_009918	1	mghv-miR-M1-14-5p_x94	167	-19.54	2	20	639	659	0.7222
Cnih4	NM_030131	1	mghv-miR-M1-7-5p_x16	160	-19.66	2	23	527	549	0.7143
Cnn2	NM_007725	1	mghv-miR-M1-10-AS-3p_x3	160	-15.51	2	20	109	129	0.7778
Cnnm1	NM_031396	1	mghv-miR-M1-2-5p_x6528	169	-24.53	2	22	2037	2059	0.75
Cnot10	NM_153585	2	mghv-miR-M1-2-5p_x6528	166	-27.77	2	21	444	465	0.7368
			mghv-miR-M1-2-5p_x5697	161	-28.1	2	20	442	464	0.7222
Cnot4	NM_001164412	4	mghv-miR-M1-2-5p_x6528	160	-25.27	2	18	28	51	0.7647
			mghv-miR-M1-8_x1482	160	-24.41	2	22	189	212	0.619
			mghv-miR-M1-8_x33513	160	-25.52	2	22	188	211	0.619
			mghv-miR-M1-8-AS-5p_x8	166	-25.49	2	21	188	211	0.7143
Cnpy1	NM_175651	1	mghv-miR-M1-14-5p_x734	162	-22.74	2	23	392	415	0.619
Cnpy3	NM_028065	2	mghv-miR-M1-2-5p_x6528	173	-30.5	2	18	223	245	0.875
			mghv-miR-M1-2-5p_x5697	168	-32.77	2	17	221	244	0.8667
Cnr1	NM_007726	3	mghv-miR-M1-8_x33513	168	-35.17	2	22	2471	2499	0.6923
			mghv-miR-M1-10-AS-3p_x3	160	-19.24	2	21	1914	1936	0.6842
			mghv-miR-M1-13-5p_x2701	166	-23.73	2	19	1269	1290	0.7647
Cnr2	NM_009924	1	mghv-miR-M1-14-5p_x94	162	-19.92	2	15	1	18	0.9231
Cntf	NM_170786	1	mghv-miR-M1-7-5p_x16	162	-22.23	2	23	222	245	0.619
Cntfr	NM_001136056	1	mghv-miR-M1-7-5p_x16	163	-18.97	2	20	456	479	0.7222
Cntln	NM_175275	1	mghv-miR-M1-13_x133	163	-15.5	2	21	975	999	0.7619
Cntn2	NM_177129	4	mghv-miR-M1-1*_x18	167	-25.87	2	21	3989	4011	0.75
			mghv-miR-M1-2-5p_x6528	161	-30.83	2	22	54	74	0.75
			mghv-miR-M1-2-5p_x5697	163	-27.74	2	22	1918	1945	0.7083
			mghv-miR-M1-12*_x10	161	-23.84	2	19	2696	2719	0.7778
Cntnap1	NM_016782	2	mghv-miR-M1-2-5p_x6528	165	-27.49	2	22	44	66	0.65
			mghv-miR-M1-2-5p_x5697	160	-28.77	2	21	42	65	0.6316
Cobl	NM_172496	2	mghv-miR-M1-2-5p_x9704	161	-22.97	2	22	751	773	0.65
			mghv-miR-M1-8_x1864	163	-24.1	2	21	1258	1281	0.6667
Cog4	NM_133973	1	mghv-miR-M1-13-5p_x2701	162	-25.1	2	21	134	158	0.7273
Col11a1	NM_007729	3	mghv-miR-M1-6_x852	164	-13.89	2	22	1302	1325	0.6667
			mghv-miR-M1-10_x122	160	-13.91	2	21	1357	1378	0.6842
			mghv-miR-M1-12_x85	163	-19.25	2	18	622	644	0.875
Col12a1	NM_007730	1	mghv-miR-M1-1_x1342	161	-17.93	2	21	1401	1422	0.75
Col15a1	NM_009928	2	mghv-miR-M1-2-5p_x6528	164	-30.23	2	22	667	690	0.7143
			mghv-miR-M1-2-5p_x5697	164	-29.23	2	22	665	689	0.7143
Col19a1	NM_007733	1	mghv-miR-M1-10-AS-5p_x1	161	-16.95	2	19	2294	2319	0.75
Col22a1	NM_027174	2	mghv-miR-M1-6*_x58	167	-24.64	2	21	631	654	0.7619
			mghv-miR-M1-6*_x46	162	-25.33	2	20	630	653	0.75
Col25a1	NM_001244952	2	mghv-miR-M1-9_x57	168	-21.72	2	21	3516	3537	0.7368
			mghv-miR-M1-14-5p_x1936	161	-22.36	2	19	836	859	0.7778
Col4a2	NM_009932	1	mghv-miR-M1-3_x1229	165	-26.61	2	19	496	519	0.8333
Col4a3bp	NM_001164222	2	mghv-miR-M1-6_x852	168	-24.29	2	22	1551	1574	0.7143
			mghv-miR-M1-10-AS-3p_x3	160	-15.5	2	21	112	134	0.7368
Col5a1	NM_015734	1	mghv-miR-M1-2-5p_x5697	164	-24.32	2	23	337	359	0.619
Col6a1	NM_009933	1	mghv-miR-M1-6_x852	163	-23.01	2	22	309	330	0.7
Col6a3	NM_001243008	1	mghv-miR-M1-1_x1342	167	-26.2	2	21	44	66	0.75
Col8a1	NM_007739	3	mghv-miR-M1-10-5p_x78	161	-19.39	2	21	463	482	0.7368
			mghv-miR-M1-10-AS-5p_x1	161	-23.08	2	21	462	482	0.7368
			mghv-miR-M1-10-AS-5p_x1	160	-15.3	2	17	1384	1406	0.8
Commd7	NM_001195390	1	mghv-miR-M1-5_x63444	165	-26.73	2	19	1252	1274	0.7895
Comtd1	NM_026965	1	mghv-miR-M1-3_x1229	160	-23.27	2	22	1036	1059	0.7143
Copg	NM_017477	1	mghv-miR-M1-9-5p_x18	168	-25.55	2	22	738	761	0.7619
Cops7a	NM_012003	1	mghv-miR-M1-2_x4	168	-28.9	2	19	389	409	0.8824
Coro1b	NM_011778	2	mghv-miR-M1-2_x4	160	-21.24	2	21	255	276	0.7368
			mghv-miR-M1-2-5p_x6528	163	-25.26	2	22	224	248	0.7727
Coro2a	NM_001164804	1	mghv-miR-M1-2-5p_x9704	163	-30.04	2	21	719	743	0.7143
Coro2b	NM_175484	1	mghv-miR-M1-2-5p_x5697	162	-26.65	2	20	283	307	0.7368
Cox15	NM_144874	1	mghv-miR-M1-2_x4	162	-36.17	2	20	2808	2832	0.7143
Cox16	NM_025461	1	mghv-miR-M1-2-5p_x110	168	-24.6	2	18	204	225	0.8824
Cox4nb	NM_010926	1	mghv-miR-M1-1_x1342	170	-25.33	2	21	719	742	0.8095
Cpd	NM_007754	2	mghv-miR-M1-2-5p_x110	164	-28.87	2	20	2920	2940	0.7895
			mghv-miR-M1-8-AS-3p_x2	161	-27.78	2	21	2933	2954	0.8
Cplx1	NM_007756	3	mghv-miR-M1-2-5p_x5697	167	-29.93	2	23	993	1016	0.7727
			mghv-miR-M1-2-5p_x9704	162	-29.19	2	22	993	1015	0.7619
			mghv-miR-M1-3_x1229	162	-22.26	2	20	1312	1335	0.7368
Cplx2	NM_009946	2	mghv-miR-M1-7-5p_x16	161	-22.2	2	23	1354	1378	0.7273
			mghv-miR-M1-13-5p_x2701	162	-22.59	2	16	2154	2176	0.8667
Cpne3	NM_027769	1	mghv-miR-M1-1_x1342	161	-21.38	2	21	167	192	0.7826
Cpne5	NM_153166	1	mghv-miR-M1-2-5p_x110	160	-20.68	2	17	523	543	0.8
Cpne8	NM_025815	2	mghv-miR-M1-1_x1342	160	-16.81	2	19	1157	1181	0.8
			mghv-miR-M1-9_x57	164	-18.52	2	17	112	133	0.8667
Cpne9	NM_170673	2	mghv-miR-M1-10-AS-5p_x1	160	-14.21	2	21	771	793	0.6842
			mghv-miR-M1-13_x133	165	-17.28	2	18	755	777	0.8125
Cpox	NM_007757	1	mghv-miR-M1-2-5p_x590	160	-21.58	2	21	1265	1286	0.7368
Cpsf7	NM_001164272	2	mghv-miR-M1-2-5p_x5697	164	-28.37	2	23	1126	1148	0.7143
			mghv-miR-M1-9_x57	161	-16.49	2	21	917	936	0.7895
Cpxm2	NM_018867	1	mghv-miR-M1-6*_x58	161	-24.15	2	19	943	965	0.7778
Crabp1	NM_013496	1	mghv-miR-M1-2-5p_x9704	160	-30.01	2	22	81	106	0.6957
Cramp1l	NM_020608	3	mghv-miR-M1-10-5p_x78	161	-12.71	2	21	2389	2408	0.7895
			mghv-miR-M1-10-AS-5p_x1	169	-17.69	2	21	2388	2408	0.8421
			mghv-miR-M1-12_x85	162	-20.27	2	20	1651	1676	0.75
Crb2	NM_001163566	1	mghv-miR-M1-9_x57	160	-18.92	2	21	2252	2273	0.6842
Crbn	NM_021449	1	mghv-miR-M1-14_x106	163	-21.96	2	21	2295	2317	0.7
Creb1	NM_001037726	2	mghv-miR-M1-1_x1342	162	-21.87	2	21	1502	1526	0.7273
			mghv-miR-M1-8-AS-5p_x8	162	-23.59	2	21	6375	6395	0.7368
Creb3l2	NM_178661	1	mghv-miR-M1-13-5p_x2701	162	-22.39	2	21	268	288	0.7368
Creb5	NM_172728	1	mghv-miR-M1-14-5p_x94	161	-24.34	2	19	1237	1258	0.7222
Crebzf	NM_145151	1	mghv-miR-M1-6_x852	167	-19.18	2	22	192	213	0.75
Creg2	NM_170597	2	mghv-miR-M1-2-5p_x5697	169	-30.87	2	22	995	1018	0.65
			mghv-miR-M1-2-5p_x9704	164	-31.36	2	21	995	1017	0.6316
Crhbp	NM_198408	1	mghv-miR-M1-2-5p_x5697	161	-24.95	2	20	495	517	0.7778
Crispld2	NM_030209	4	mghv-miR-M1-2-5p_x6528	166	-30.28	2	20	156	180	0.75
			mghv-miR-M1-2-5p_x5697	161	-31.08	2	19	154	179	0.7368
			mghv-miR-M1-8_x254	174	-34.67	2	23	1167	1190	0.6667
			mghv-miR-M1-8_x1482	169	-33.2	2	22	1167	1189	0.65
Crk	NM_133656	2	mghv-miR-M1-3_x1229	160	-23.15	2	22	766	789	0.7143
			mghv-miR-M1-9-5p_x18	167	-20.77	2	21	1279	1302	0.75
Crmp1	NM_001136058	1	mghv-miR-M1-14_x106	169	-21.6	2	18	307	328	0.8125
Crtac1	NM_145123	1	mghv-miR-M1-1_x1342	168	-17.99	2	21	264	285	0.7368
Crtc1	NM_001004062	4	mghv-miR-M1-1*_x18	167	-20.52	2	20	338	359	0.7778
			mghv-miR-M1-7-5p_x16	173	-25.01	2	22	2292	2315	0.75
			mghv-miR-M1-7-5p_x16	163	-22.28	2	20	3007	3030	0.7222
			mghv-miR-M1-8_x1864	168	-28.29	2	21	1751	1772	0.6316
Crtc3	NM_173863	4	mghv-miR-M1-14-5p_x734	188	-42.68	2	23	2932	2954	0.9048
			mghv-miR-M1-14-5p_x1936	183	-39.16	2	22	2932	2953	0.9
			mghv-miR-M1-14-5p_x634	178	-35.64	2	21	2932	2952	0.8947
			mghv-miR-M1-14-5p_x94	173	-32.12	2	20	2932	2951	0.8889
Cry2	NM_001113333	1	mghv-miR-M1-8_x254	163	-26.64	2	22	300	322	0.7
Cry2	NM_009963	1	mghv-miR-M1-12*_x10	161	-21.57	2	18	316	338	0.75
Crybg3	NM_174848	2	mghv-miR-M1-2-5p_x6528	163	-30.24	2	22	1623	1644	0.75
			mghv-miR-M1-8_x1482	160	-23.37	2	22	291	314	0.619
Cs	NM_026444	1	mghv-miR-M1-2-5p_x6528	161	-28.5	2	22	190	209	0.75
Csda	NM_011733	1	mghv-miR-M1-6_x852	163	-23.17	2	22	251	272	0.7
Csf1	NM_001113529	2	mghv-miR-M1-7-5p_x16	162	-26.44	2	23	1884	1907	0.6667
			mghv-miR-M1-7-5p_x16	160	-21.75	2	17	1782	1805	0.8
Csf2rb	NM_007780	2	mghv-miR-M1-1_x1342	162	-15.34	2	20	496	518	0.7895
			mghv-miR-M1-13-5p_x2701	169	-26.49	2	20	1139	1159	0.8333
Csmd1	NM_053171	1	mghv-miR-M1-10-AS-5p_x1	163	-16.31	2	22	1943	1964	0.75
Csnk1d	NM_027874	2	mghv-miR-M1-10-5p_x78	167	-20.97	2	21	2004	2026	0.75
			mghv-miR-M1-13-5p_x2701	160	-24.09	2	17	1382	1403	0.8
Csnk1g1	NM_173185	3	mghv-miR-M1-1_x1342	167	-20.99	2	21	3474	3497	0.7619
			mghv-miR-M1-2-5p_x5697	162	-25.02	2	23	4368	4391	0.619
			mghv-miR-M1-7-5p_x16	173	-26.23	2	22	4482	4505	0.8
Csnk2a1	NM_007788	1	mghv-miR-M1-10_x122	165	-19.25	2	19	1543	1565	0.7778
Csnk2a2	NM_009974	3	mghv-miR-M1-1*_x18	161	-18.61	2	21	172	193	0.8
			mghv-miR-M1-13-5p_x2701	163	-24.06	2	20	1617	1636	0.8333
			mghv-miR-M1-14-5p_x94	160	-21.14	2	19	2133	2152	0.8235
Cspg5	NM_001166273	1	mghv-miR-M1-10-AS-5p_x1	168	-18.41	2	22	177	200	0.7619
Csrnp2	NM_153407	6	mghv-miR-M1-8_x254	165	-27.57	2	23	1540	1565	0.6087
			mghv-miR-M1-8_x1482	160	-28.37	2	22	1540	1564	0.5909
			mghv-miR-M1-8_x33513	160	-26.85	2	22	1539	1563	0.5909
			mghv-miR-M1-8-AS-5p_x8	162	-22.35	2	21	1539	1563	0.6818
			mghv-miR-M1-13-5p_x2701	160	-22.86	2	17	724	745	0.8
			mghv-miR-M1-14-5p_x1936	163	-24.67	2	21	343	366	0.7
Csrnp3	NM_153409	2	mghv-miR-M1-2-5p_x590	160	-23.38	2	21	1304	1325	0.7368
			mghv-miR-M1-13_x133	169	-21.17	2	22	3677	3699	0.75
Csta	NM_001033239	2	mghv-miR-M1-1_x1342	160	-12.15	2	21	1792	1813	0.7368
			mghv-miR-M1-13-5p_x2701	164	-17.53	2	21	1489	1510	0.6316
Cstf1	NM_024199	1	mghv-miR-M1-8_x254	161	-26.25	2	23	202	227	0.6522
Cstf3	NM_001037326	1	mghv-miR-M1-6_x852	163	-15.03	2	21	422	445	0.75
Ctbp2	NM_001170744	1	mghv-miR-M1-6_x852	161	-16.82	2	22	636	658	0.65
Ctcf	NM_181322	2	mghv-miR-M1-14-5p_x1936	168	-24.91	2	22	303	326	0.7619
			mghv-miR-M1-14-5p_x634	163	-26.19	2	21	303	325	0.75
Ctdsp2	NM_001113470	2	mghv-miR-M1-2-5p_x110	162	-28.18	2	17	3092	3111	0.8667
			mghv-miR-M1-8-AS-5p_x8	166	-21.09	2	21	1262	1282	0.7368
Ctdspl	NM_133710	3	mghv-miR-M1-1_x1342	167	-16.7	2	21	2517	2539	0.8
			mghv-miR-M1-3_x1229	166	-27.4	2	22	1285	1311	0.7917
			mghv-miR-M1-14-5p_x1936	162	-27.58	2	20	1737	1761	0.75
Ctdspl2	NM_212450	1	mghv-miR-M1-8_x1864	162	-25.29	2	20	209	232	0.7
Ctf1	NM_007795	2	mghv-miR-M1-2-5p_x5697	166	-27.48	2	23	554	577	0.6667
			mghv-miR-M1-2-5p_x9704	161	-26.74	2	22	554	576	0.65
Ctif	NM_201354	3	mghv-miR-M1-2-5p_x5697	167	-30.69	2	21	697	721	0.75
			mghv-miR-M1-2-5p_x9704	162	-31.18	2	20	697	720	0.7368
			mghv-miR-M1-2-5p_x590	165	-27.4	2	20	2983	3003	0.8333
Ctla4	NM_009843	2	mghv-miR-M1-4_x56	166	-24.06	2	21	928	949	0.7368
			mghv-miR-M1-4_x32	161	-24.86	2	20	928	948	0.7222
Ctnnd1	NM_001085448	1	mghv-miR-M1-2-5p_x9704	167	-28.43	2	22	1652	1673	0.75
Ctns	NM_031251	1	mghv-miR-M1-2-5p_x590	161	-23.73	2	18	886	907	0.8125
Ctrl	NM_023182	1	mghv-miR-M1-6_x852	160	-17.99	2	22	34	57	0.7143
Ctsb	NM_007798	1	mghv-miR-M1-8_x254	162	-25.66	2	21	1802	1830	0.7083
Ctsj	NM_012007	1	mghv-miR-M1-7-5p_x16	167	-23.7	2	22	38	60	0.75
Ctsl	NM_009984	1	mghv-miR-M1-8*_x129	163	-18.49	2	21	516	541	0.7391
Cttnbp2	NM_080285	1	mghv-miR-M1-12_x85	160	-22.19	2	18	852	876	0.7647
Ctu2	NM_153775	1	mghv-miR-M1-12_x85	160	-21.91	2	17	830	853	0.8
Ctxn1	NM_183315	1	mghv-miR-M1-8_x1482	176	-30.55	2	21	240	262	0.6842
Cuedc1	NM_001172099	2	mghv-miR-M1-2-5p_x9704	162	-24.83	2	20	454	477	0.7368
			mghv-miR-M1-12_x85	161	-23.76	2	18	90	113	0.75
Cuedc2	NM_001164290	1	mghv-miR-M1-6_x852	160	-20.63	2	22	309	332	0.6667
Cul2	NM_029402	2	mghv-miR-M1-2-5p_x9704	163	-25.22	2	21	888	911	0.75
			mghv-miR-M1-8_x254	160	-31.06	2	22	1619	1643	0.619
Cul4a	NM_146207	1	mghv-miR-M1-8_x1864	163	-31.33	2	21	8	31	0.6667
Cul5	NM_001161618	1	mghv-miR-M1-6_x852	162	-21.28	2	22	2091	2115	0.7391
Cux1	NM_198602	1	mghv-miR-M1-10_x122	163	-14.37	2	20	460	481	0.7778
Cwc22	NM_030560	1	mghv-miR-M1-10-AS-5p_x1	162	-15.93	2	22	138	160	0.7619
Cwf19l1	NM_001081077	2	mghv-miR-M1-2-5p_x5697	161	-24.33	2	23	1318	1343	0.6957
			mghv-miR-M1-6_x852	160	-21.51	2	17	1590	1612	0.8
Cx3cl1	NM_009142	1	mghv-miR-M1-1_x1342	160	-22.88	2	21	1411	1432	0.6316
Cxcl12	NM_001012477	2	mghv-miR-M1-2-5p_x110	173	-27.86	2	18	71	91	0.875
			mghv-miR-M1-13-5p_x2701	160	-23.93	2	17	105	126	0.7333
Cxcl14	NM_019568	4	mghv-miR-M1-2-5p_x6528	177	-34.58	2	22	874	896	0.75
			mghv-miR-M1-2-5p_x5697	177	-35.38	2	22	872	895	0.75
			mghv-miR-M1-2-5p_x9704	172	-31.95	2	21	872	894	0.7368
			mghv-miR-M1-2-5p_x590	167	-30.48	2	20	872	893	0.7222
Cxcl15	NM_011339	1	mghv-miR-M1-2-5p_x9704	162	-25.53	2	21	163	184	0.6842
Cxcl16	NM_023158	1	mghv-miR-M1-6*_x46	162	-20.64	2	21	38	58	0.7895
Cxx1a	NM_024170	1	mghv-miR-M1-2-5p_x9704	160	-24.19	2	21	79	101	0.6316
Cxx1b	NM_001018063	1	mghv-miR-M1-2-5p_x9704	160	-24.19	2	21	79	101	0.6316
Cyb5	NM_025797	1	mghv-miR-M1-2-5p_x5697	161	-27.45	2	22	73	96	0.7
Cyb561d1	NM_001081320	2	mghv-miR-M1-2-5p_x6528	166	-32.12	2	22	2925	2948	0.7727
			mghv-miR-M1-2-5p_x5697	161	-30.65	2	21	2923	2947	0.7619
Cyb5b	NM_025558	1	mghv-miR-M1-8_x254	162	-16.27	2	23	1998	2021	0.7143
Cyb5d2	NM_001024926	1	mghv-miR-M1-2-5p_x5697	164	-25.97	2	22	621	647	0.6957
Cyb5r2	NM_001205227	1	mghv-miR-M1-7-5p_x16	162	-21.21	2	20	625	649	0.7368
Cybasc3	NM_201351	1	mghv-miR-M1-2-5p_x6528	162	-27.5	2	20	552	575	0.6842
Cybrd1	NM_028593	1	mghv-miR-M1-2-5p_x110	162	-23.7	2	20	1148	1169	0.7368
Cyfip1	NM_001164661	3	mghv-miR-M1-6_x852	169	-18.46	2	22	1936	1958	0.7
			mghv-miR-M1-6_x852	166	-21.41	2	22	329	351	0.8095
			mghv-miR-M1-8_x33513	162	-20.98	2	20	462	485	0.7368
Cyld	NM_001128169	1	mghv-miR-M1-6*_x58	160	-22.65	2	13	4656	4677	1
Cyp19a1	NM_007810	1	mghv-miR-M1-9-5p_x18	165	-20.82	2	22	67	89	0.7
Cyp1b1	NM_009994	2	mghv-miR-M1-6*_x46	160	-17.03	2	19	636	656	0.8235
			mghv-miR-M1-10-AS-5p_x1	169	-22.59	2	22	1120	1142	0.75
Cyp24a1	NM_009996	1	mghv-miR-M1-2-5p_x5697	161	-28.2	2	20	27	52	0.75
Cyp26b1	NM_001177713	4	mghv-miR-M1-2-5p_x590	161	-26.78	2	19	1058	1080	0.7778
			mghv-miR-M1-3_x1229	160	-23.53	2	22	2206	2229	0.619
			mghv-miR-M1-8_x1864	161	-29.45	2	18	835	856	0.6875
			mghv-miR-M1-14-5p_x94	161	-19.89	2	20	1762	1781	0.7778
Cyp27b1	NM_010009	1	mghv-miR-M1-3_x1229	160	-23.78	2	20	498	523	0.8095
Cyp2b19	NM_007814	1	mghv-miR-M1-8_x33513	168	-22.14	2	22	325	349	0.7273
Cyp2c29	NM_007815	1	mghv-miR-M1-6_x852	168	-18.58	2	21	127	149	0.7368
Cyp2c39	NM_010003	1	mghv-miR-M1-2-5p_x6528	167	-31.78	2	21	1	26	0.6957
Cyp2j13	NM_145548	3	mghv-miR-M1-2-5p_x5697	166	-28.89	2	23	1578	1598	0.7619
			mghv-miR-M1-2-5p_x9704	161	-28.15	2	22	1578	1597	0.75
			mghv-miR-M1-13-5p_x2701	171	-22.71	2	20	1110	1131	0.8333
Cyp3a13	NM_007819	1	mghv-miR-M1-6_x852	165	-22.32	2	20	747	768	0.8333
Cyp4f16	NM_024442	1	mghv-miR-M1-14-5p_x1936	165	-26.77	2	20	197	218	0.8333
Cyp51	NM_020010	3	mghv-miR-M1-2-5p_x590	172	-30.92	2	18	965	987	0.8824
			mghv-miR-M1-2-5p_x110	162	-26.89	2	16	964	985	0.8667
			mghv-miR-M1-13_x133	165	-20.32	2	22	1082	1104	0.7
Cyp7a1	NM_007824	3	mghv-miR-M1-6_x852	162	-21.41	2	20	2568	2593	0.7143
			mghv-miR-M1-10-5p_x78	161	-17.12	2	20	218	242	0.7619
			mghv-miR-M1-10-AS-5p_x1	161	-13.51	2	19	325	349	0.7895
Cys1	NM_001161807	1	mghv-miR-M1-13-5p_x2701	164	-24.64	2	21	104	125	0.7368
Cyth1	NM_001112699	1	mghv-miR-M1-8_x1482	162	-20.95	2	21	1055	1079	0.7619
Cyth3	NM_001163548	2	mghv-miR-M1-8_x1864	166	-23.79	2	19	1221	1242	0.7059
			mghv-miR-M1-14-5p_x94	165	-26.22	2	19	69	91	0.7895
Cytip	NM_139200	2	mghv-miR-M1-1_x1342	165	-21.5	2	19	1559	1581	0.8333
			mghv-miR-M1-1_x1342	163	-24.73	2	21	2764	2786	0.75
Cytl1	NM_001081106	1	mghv-miR-M1-8_x1864	161	-21.98	2	18	122	143	0.75
D030016E14Rik	NM_177240	1	mghv-miR-M1-10-5p_x12	161	-17.21	2	18	9	29	0.75
D11Wsu99e	NM_138598	1	mghv-miR-M1-13-5p_x2701	162	-24.66	2	17	1744	1764	0.8667
D16Ertd472e	NM_001252438	1	mghv-miR-M1-10-5p_x78	161	-17.18	2	20	2243	2263	0.7222
D17Wsu92e	NM_001033279	3	mghv-miR-M1-2-5p_x6528	168	-29.35	2	21	572	594	0.7368
			mghv-miR-M1-2-5p_x5697	163	-27.88	2	20	570	593	0.7222
			mghv-miR-M1-2-5p_x5697	161	-26.56	2	22	2377	2400	0.7
D19Ertd386e	NM_177464	1	mghv-miR-M1-8-AS-5p_x8	161	-21.45	2	21	830	849	0.7368
D230025D16Rik	NM_145604	2	mghv-miR-M1-8_x254	160	-27.19	2	21	508	531	0.6316
			mghv-miR-M1-13-5p_x2701	166	-23.83	2	20	1180	1202	0.6842
D2Ertd750e	NM_026412	2	mghv-miR-M1-2-5p_x5697	172	-30.02	2	23	1435	1457	0.7143
			mghv-miR-M1-2-5p_x9704	167	-29.28	2	22	1435	1456	0.7
D2Wsu81e	NM_172660	2	mghv-miR-M1-8_x33513	161	-27	2	19	88	111	0.7222
			mghv-miR-M1-13-5p_x2701	162	-26.25	2	21	337	360	0.7143
D330012F22Rik	NM_178752	1	mghv-miR-M1-2-5p_x9704	160	-23.58	2	21	1561	1583	0.6316
D3Ertd254e	NM_001101478	2	mghv-miR-M1-2-5p_x6528	161	-25.49	2	22	2856	2878	0.6
			mghv-miR-M1-6_x852	165	-23.18	2	22	2576	2598	0.7
D3Ertd751e	NM_001099785	1	mghv-miR-M1-10_x122	161	-19.09	2	14	2632	2653	0.9167
D430019H16Rik	NM_001252508	2	mghv-miR-M1-10-AS-5p_x1	160	-15.71	2	19	5122	5146	0.7895
			mghv-miR-M1-14-5p_x734	172	-33.16	2	22	1229	1255	0.7391
D430042O09Rik	NM_001081022	1	mghv-miR-M1-8_x254	162	-26.13	2	23	538	561	0.6667
D4Ertd22e	NM_001025608	1	mghv-miR-M1-13-5p_x2701	163	-22.21	2	16	1515	1536	0.8571
D630037F22Rik	NM_001033385	1	mghv-miR-M1-8-AS-5p_x8	160	-22.5	2	21	2382	2403	0.6316
D630039A03Rik	NM_178727	2	mghv-miR-M1-2-5p_x110	168	-27.61	2	18	1388	1409	0.8824
			mghv-miR-M1-9_x57	161	-20.84	2	19	761	784	0.7368
D630042F21Rik	NM_001081186	1	mghv-miR-M1-8_x254	161	-23.66	2	23	1502	1526	0.6818
D630045J12Rik	NM_194061	3	mghv-miR-M1-3_x1229	161	-20.68	2	18	1862	1884	0.6875
			mghv-miR-M1-9_x57	164	-19.48	2	18	207	229	0.8235
			mghv-miR-M1-10-AS-3p_x3	162	-21.62	2	21	1530	1555	0.7727
D6Wsu163e	NM_138594	1	mghv-miR-M1-9_x57	163	-18.5	2	21	446	468	0.75
D730040F13Rik	NM_175518	1	mghv-miR-M1-6_x852	163	-17.34	2	22	3578	3599	0.7
Dach1	NM_001038610	2	mghv-miR-M1-8_x33513	163	-23.03	2	16	1046	1068	0.7857
			mghv-miR-M1-14-5p_x734	161	-31.43	2	23	1247	1274	0.68
Dach2	NM_001142570	2	mghv-miR-M1-13_x133	161	-15.51	2	18	2119	2141	0.75
			mghv-miR-M1-14-5p_x734	161	-26.91	2	23	2485	2509	0.6364
Dach2	NM_033605	1	mghv-miR-M1-1*_x18	162	-24.39	2	15	786	807	0.9231
Dak	NM_145496	1	mghv-miR-M1-2-5p_x5697	164	-25.44	2	17	78	101	0.8667
Dap	NM_146057	1	mghv-miR-M1-14_x106	168	-20.54	2	21	292	313	0.7895
Dap3	NM_001164533	3	mghv-miR-M1-8_x33513	165	-29.14	2	22	2684	2706	0.65
			mghv-miR-M1-8_x1864	160	-29.74	2	21	2684	2705	0.6316
			mghv-miR-M1-13-5p_x2701	160	-22.46	2	21	970	991	0.5789
Dapp1	NM_011932	1	mghv-miR-M1-8_x254	164	-27.84	2	23	1306	1328	0.7143
Dazap2	NM_011873	1	mghv-miR-M1-12*_x10	163	-26.24	2	19	677	697	0.8235
Dazl	NM_010021	1	mghv-miR-M1-8-AS-5p_x8	160	-17.17	2	21	746	767	0.6842
Dbpht2	NM_198866	2	mghv-miR-M1-6_x852	180	-25.55	2	21	453	475	0.7895
			mghv-miR-M1-8_x254	173	-31.58	2	23	1210	1235	0.6957
Dbr1	NM_031403	1	mghv-miR-M1-13_x133	161	-16.21	2	18	160	182	0.75
Dcaf10	NM_153167	3	mghv-miR-M1-1_x1342	161	-18.23	2	18	2542	2563	0.8125
			mghv-miR-M1-8_x1482	163	-28.2	2	21	792	816	0.7143
			mghv-miR-M1-9_x57	168	-17.27	2	21	1240	1261	0.7368
Dcaf12	NM_026893	2	mghv-miR-M1-6_x852	168	-22.53	2	18	1298	1321	0.8824
			mghv-miR-M1-6_x852	164	-18.41	2	21	35	57	0.7368
Dcaf17	NM_001165980	2	mghv-miR-M1-6*_x46	163	-24.64	2	21	4836	4859	0.7619
			mghv-miR-M1-14-5p_x94	166	-23.83	2	20	84	107	0.7143
Dcaf8	NM_153555	1	mghv-miR-M1-2-5p_x6528	168	-31.02	2	21	1201	1223	0.7895
Dcbld2	NM_028523	1	mghv-miR-M1-2-5p_x5697	160	-23.97	2	23	3386	3413	0.64
Dcc	NM_007831	2	mghv-miR-M1-7-5p_x16	167	-23.47	2	20	4832	4855	0.7778
			mghv-miR-M1-8_x33513	163	-19.12	2	22	3462	3483	0.7
Dcdc2a	NM_177577	4	mghv-miR-M1-2_x4	167	-25.22	2	21	5025	5047	0.8
			mghv-miR-M1-2-5p_x5697	173	-28.33	2	23	1290	1314	0.7273
			mghv-miR-M1-2-5p_x9704	168	-28.02	2	22	1290	1313	0.7143
			mghv-miR-M1-8_x1864	161	-25.11	2	18	3879	3900	0.75
Dclk1	NM_001111052	1	mghv-miR-M1-2-5p_x9704	166	-29.74	2	19	71	93	0.7059
Dclk2	NM_001195496	1	mghv-miR-M1-13-5p_x2701	169	-25.46	2	19	1027	1049	0.8333
Dclk3	NM_172928	1	mghv-miR-M1-2-5p_x9704	160	-25.86	2	22	359	383	0.6818
Dclre1a	NM_018831	1	mghv-miR-M1-13-5p_x2701	167	-31.34	2	21	165	187	0.75
Dclre1b	NM_001025312	1	mghv-miR-M1-9_x57	167	-18.14	2	21	741	765	0.7727
Dclre1c	NM_146114	2	mghv-miR-M1-10-AS-5p_x1	164	-21.11	2	21	739	762	0.8095
			mghv-miR-M1-13_x133	164	-16.47	2	22	295	318	0.7143
Dcp1a	NM_133761	2	mghv-miR-M1-6*_x46	161	-23.73	2	21	1654	1673	0.7895
			mghv-miR-M1-12*_x10	165	-24.32	2	19	1831	1855	0.7895
Dcp2	NM_027490	3	mghv-miR-M1-1_x1342	163	-17.35	2	20	4227	4248	0.7778
			mghv-miR-M1-2-5p_x6528	163	-27.67	2	22	3991	4012	0.7
			mghv-miR-M1-8_x254	163	-29.97	2	22	622	644	0.7
Dctd	NM_001161515	4	mghv-miR-M1-2-5p_x5697	175	-31.74	2	22	740	762	0.8
			mghv-miR-M1-2-5p_x9704	170	-31.43	2	21	740	761	0.7895
			mghv-miR-M1-2-5p_x590	165	-29.96	2	20	740	760	0.7778
			mghv-miR-M1-6*_x46	162	-24.6	2	20	943	969	0.7391
Dctn4	NM_026302	1	mghv-miR-M1-10-AS-5p_x1	164	-15.9	2	21	2004	2026	0.6842
Dcun1d1	NM_001205361	2	mghv-miR-M1-8_x1864	160	-22.51	2	21	3200	3221	0.6316
			mghv-miR-M1-10_x122	172	-20.93	2	21	2898	2919	0.6842
Dcun1d3	NM_001163703	1	mghv-miR-M1-13_x133	166	-20.15	2	21	2844	2865	0.7895
Dcx	NM_001110222	1	mghv-miR-M1-10-AS-3p_x3	161	-20.01	2	21	7584	7606	0.75
Ddah1	NM_026993	1	mghv-miR-M1-13-5p_x2701	163	-25.69	2	21	332	355	0.7143
Ddhd2	NM_028102	2	mghv-miR-M1-13-5p_x2701	168	-24.25	2	21	116	137	0.6842
			mghv-miR-M1-13-5p_x2701	162	-26.4	2	21	1694	1717	0.7619
Ddi2	NM_001017966	3	mghv-miR-M1-2-5p_x6528	161	-23.59	2	22	1645	1667	0.65
			mghv-miR-M1-8-AS-3p_x2	160	-17.37	2	21	1104	1125	0.7368
			mghv-miR-M1-14_x106	161	-17.05	2	18	738	759	0.8125
Ddn	NM_001013741	3	mghv-miR-M1-10-5p_x12	170	-23.51	2	15	588	608	1
			mghv-miR-M1-10-5p_x78	167	-25.83	2	21	585	607	0.8
			mghv-miR-M1-14_x106	160	-20.81	2	21	976	997	0.6842
Ddr1	NM_001198831	2	mghv-miR-M1-2-5p_x110	168	-30.96	2	18	151	172	0.8235
			mghv-miR-M1-3_x1229	163	-21.59	2	20	508	530	0.7778
Ddr2	NM_022563	2	mghv-miR-M1-9_x57	160	-19.04	2	17	2686	2707	0.8
			mghv-miR-M1-14-5p_x1936	160	-21.44	2	22	4386	4409	0.6667
Ddx19b	NM_001190786	2	mghv-miR-M1-2-5p_x110	164	-23.5	2	19	1722	1741	0.7647
			mghv-miR-M1-8_x1482	161	-23.57	2	22	992	1014	0.6
Ddx24	NM_001159502	1	mghv-miR-M1-3_x1229	161	-26.11	2	20	170	196	0.7273
Ddx31	NM_001033294	1	mghv-miR-M1-1*_x18	165	-25.89	2	19	523	545	0.8333
Ddx4	NM_001145885	1	mghv-miR-M1-2-5p_x5697	160	-26.21	2	22	585	611	0.6957
Ddx46	NM_145975	1	mghv-miR-M1-8_x1864	162	-24.3	2	19	1560	1581	0.7059
Ddx51	NM_027156	1	mghv-miR-M1-2-5p_x110	161	-22	2	20	2749	2768	0.7222
Ddx52	NM_030096	1	mghv-miR-M1-8_x254	164	-20.17	2	22	353	378	0.6818
Ddx58	NM_172689	1	mghv-miR-M1-2-5p_x590	169	-30.23	2	19	1403	1425	0.8333
Ddx6	NM_001110826	2	mghv-miR-M1-2_x4	175	-35.36	2	21	2216	2238	0.8
			mghv-miR-M1-2-5p_x110	166	-25.01	2	20	3344	3365	0.7895
Def8	NM_001253783	2	mghv-miR-M1-2_x4	172	-30.83	2	21	668	689	0.7895
			mghv-miR-M1-10_x122	174	-26.05	2	19	1642	1663	0.8235
Defb45	NM_001037752	1	mghv-miR-M1-6_x852	167	-21.28	2	22	44	65	0.7
Degs2	NM_001171002	2	mghv-miR-M1-4_x32	162	-28.42	2	17	942	962	0.8667
			mghv-miR-M1-13-5p_x2701	162	-29.03	2	21	1701	1721	0.7895
Dennd1b	NM_001166501	1	mghv-miR-M1-13-5p_x2701	163	-20.3	2	20	1944	1965	0.7222
Dennd4b	NM_201407	1	mghv-miR-M1-13-5p_x2701	163	-22.94	2	21	388	410	0.75
Dennd4c	NM_184088	1	mghv-miR-M1-6_x852	164	-18.66	2	22	1566	1590	0.6364
Dennd5b	NM_177192	1	mghv-miR-M1-10-AS-3p_x3	163	-22.29	2	22	1507	1528	0.7
Depdc5	NM_001025426	5	mghv-miR-M1-8_x254	176	-30.58	2	21	888	911	0.7895
			mghv-miR-M1-8_x1482	171	-29.11	2	20	888	910	0.7778
			mghv-miR-M1-8_x1482	160	-24.93	2	22	227	250	0.619
			mghv-miR-M1-8_x33513	166	-27.67	2	19	887	909	0.7647
			mghv-miR-M1-8_x1864	161	-23.85	2	18	887	908	0.75
Deptor	NM_001037937	2	mghv-miR-M1-10_x122	161	-14.69	2	20	1417	1437	0.7778
			mghv-miR-M1-10-AS-3p_x3	163	-21.23	2	21	530	553	0.75
Dffa	NM_001025296	3	mghv-miR-M1-2-5p_x6528	167	-31.26	2	22	51	72	0.8
			mghv-miR-M1-2-5p_x9704	169	-31.8	2	22	49	69	0.85
			mghv-miR-M1-2-5p_x590	164	-32.13	2	21	49	68	0.8421
Dgcr8	NM_033324	1	mghv-miR-M1-7-5p_x16	172	-25.78	2	22	674	698	0.7619
Dgke	NM_019505	1	mghv-miR-M1-13_x133	162	-14.36	2	22	2076	2098	0.7619
Dgkg	NM_138650	2	mghv-miR-M1-3_x1229	162	-20.94	2	20	2611	2634	0.7368
			mghv-miR-M1-12_x85	176	-32.22	2	18	2442	2466	0.9412
Dgkh	NM_001081336	1	mghv-miR-M1-8_x1864	160	-24.4	2	21	346	367	0.6842
Dgkk	NM_177914	1	mghv-miR-M1-13-5p_x2701	161	-21.84	2	18	3239	3260	0.8125
Dhcr24	NM_053272	5	mghv-miR-M1-2-5p_x6528	171	-32.02	2	21	879	902	0.75
			mghv-miR-M1-2-5p_x5697	168	-32.84	2	23	876	901	0.7391
			mghv-miR-M1-2-5p_x9704	163	-29.41	2	22	876	900	0.7273
			mghv-miR-M1-2-5p_x9704	160	-27.38	2	21	1166	1186	0.7895
			mghv-miR-M1-7-5p_x16	169	-23.59	2	22	1058	1081	0.7
Dhdds	NM_026144	1	mghv-miR-M1-2-5p_x590	164	-27.7	2	21	1374	1395	0.6842
Dhdh	NM_027903	1	mghv-miR-M1-2-5p_x9704	160	-23.49	2	22	751	774	0.7143
Dhfr	NM_010049	1	mghv-miR-M1-2-5p_x110	161	-23.71	2	19	3899	3921	0.7368
Dhh	NM_007857	1	mghv-miR-M1-8_x1482	160	-23.12	2	22	656	679	0.7143
Dhrs1	NM_026819	1	mghv-miR-M1-14-5p_x94	163	-22.28	2	20	14	34	0.7778
Dhrs3	NM_001172424	1	mghv-miR-M1-14_x106	160	-18.08	2	21	236	257	0.6842
Dhrs9	NM_175512	1	mghv-miR-M1-10-AS-5p_x1	172	-17.72	2	22	711	734	0.8095
Dhx40	NM_026191	1	mghv-miR-M1-9_x57	161	-21.54	2	21	28	49	0.8
Dhx9	NM_007842	1	mghv-miR-M1-5*_x390	160	-23.22	2	21	225	246	0.6842
Diap2	NM_172493	4	mghv-miR-M1-2-5p_x5697	161	-26.48	2	23	3400	3424	0.6364
			mghv-miR-M1-5_x63444	162	-22.73	2	15	4515	4535	0.9231
			mghv-miR-M1-8*_x129	161	-19.35	2	21	954	973	0.7368
			mghv-miR-M1-10-AS-5p_x1	165	-17.64	2	22	4620	4640	0.8
Dicer1	NM_148948	2	mghv-miR-M1-8_x33513	164	-22.01	2	17	766	788	0.8667
			mghv-miR-M1-8-AS-5p_x8	163	-20.08	2	16	767	788	0.8571
Dido1	NM_011805	1	mghv-miR-M1-6_x852	163	-16.7	2	22	2409	2430	0.65
Dido1	NM_177852	1	mghv-miR-M1-8-AS-5p_x8	161	-19.57	2	18	350	371	0.75
Diexf	NM_145415	1	mghv-miR-M1-14-5p_x734	161	-25.27	2	22	46	69	0.65
Dip2a	NM_001081419	2	mghv-miR-M1-2_x4	162	-28.32	2	17	68	88	0.8667
			mghv-miR-M1-13_x133	163	-17.59	2	16	647	669	0.8571
Diras2	NM_001024474	1	mghv-miR-M1-10-5p_x78	167	-23.71	2	21	2228	2250	0.8
Dis3l2	NM_001172157	1	mghv-miR-M1-12_x85	165	-25.91	2	23	47	72	0.6957
Dixdc1	NM_178118	2	mghv-miR-M1-6*_x46	161	-18.43	2	20	437	457	0.7778
			mghv-miR-M1-14-5p_x94	167	-24.14	2	20	2618	2638	0.7222
Dlat	NM_145614	2	mghv-miR-M1-10_x122	162	-18.2	2	19	1670	1691	0.7647
			mghv-miR-M1-10-AS-5p_x1	161	-15.24	2	22	47	69	0.7
Dlc1	NM_001194940	1	mghv-miR-M1-10-AS-5p_x1	163	-16.67	2	20	1506	1528	0.7222
Dlg2	NM_001243046	4	mghv-miR-M1-2-5p_x110	164	-24.32	2	20	942	960	0.7778
			mghv-miR-M1-2-5p_x110	163	-21.67	2	20	4382	4402	0.7222
			mghv-miR-M1-6_x852	163	-21.83	2	18	2021	2042	0.875
			mghv-miR-M1-9-5p_x18	161	-18.71	2	22	3543	3565	0.7
Dlg3	NM_001177778	2	mghv-miR-M1-8_x33513	165	-27.2	2	22	1316	1338	0.65
			mghv-miR-M1-8-AS-5p_x8	171	-29.71	2	21	1316	1338	0.75
Dlg4	NM_001109752	1	mghv-miR-M1-7-5p_x16	162	-23.08	2	20	548	572	0.7895
Dlk1	NM_001190703	2	mghv-miR-M1-4_x32	174	-25.61	2	21	2121	2141	0.8421
			mghv-miR-M1-12_x85	168	-33.16	2	23	707	733	0.75
Dmbx1	NM_001025567	1	mghv-miR-M1-3_x1229	165	-24.51	2	22	1589	1611	0.75
Dmpk	NM_001190490	3	mghv-miR-M1-2-5p_x6528	162	-35.94	2	22	520	548	0.7308
			mghv-miR-M1-2-5p_x9704	166	-34.18	2	21	518	545	0.75
			mghv-miR-M1-2-5p_x590	161	-34.51	2	20	518	544	0.7391
Dmrt1	NM_015826	1	mghv-miR-M1-10_x122	160	-14.96	2	18	771	793	0.8235
Dmrt2	NM_145831	1	mghv-miR-M1-10-5p_x78	167	-24.4	2	16	30	51	0.9286
Dmrtb1	NM_019872	1	mghv-miR-M1-7-5p_x16	175	-30.52	2	23	461	484	0.8182
Dmrtc1a	NM_001038616	1	mghv-miR-M1-10-AS-3p_x3	167	-15.47	2	22	221	242	0.75
Dmrtc1c1	NM_001142691	2	mghv-miR-M1-8_x254	160	-22.1	2	22	72	96	0.6667
			mghv-miR-M1-8_x254	160	-22.1	2	22	72	96	0.6667
Dmrtc1c2	NM_001142690	2	mghv-miR-M1-8_x254	160	-22.1	2	22	72	96	0.6667
			mghv-miR-M1-8_x254	160	-22.1	2	22	72	96	0.6667
Dmtf1	NM_001110327	2	mghv-miR-M1-5*_x390	170	-24.87	2	19	66	87	0.8235
			mghv-miR-M1-6*_x58	175	-27.86	2	20	457	478	0.8333
Dmxl1	NM_001081371	1	mghv-miR-M1-7-5p_x16	164	-22.61	2	18	363	387	0.8235
Dmxl2	NM_172771	1	mghv-miR-M1-8_x254	163	-24.44	2	22	542	567	0.6818
Dnaic2	NM_001034878	1	mghv-miR-M1-3_x1229	163	-28.64	2	22	355	376	0.75
Dnaja1	NM_001164671	1	mghv-miR-M1-2-5p_x5697	160	-23.7	2	23	4134	4156	0.7143
Dnajb1	NM_018808	1	mghv-miR-M1-10-AS-5p_x1	167	-20.98	2	20	359	381	0.6667
Dnajb11	NM_001190804	2	mghv-miR-M1-2-5p_x6528	161	-28.66	2	19	192	215	0.7778
			mghv-miR-M1-7-3p_x235	161	-23.63	2	19	22	44	0.7368
Dnajb5	NM_019874	1	mghv-miR-M1-10-5p_x12	161	-20.58	2	20	1061	1080	0.7778
Dnajb6	NM_001037940	1	mghv-miR-M1-6*_x46	171	-29.72	2	21	1130	1152	0.8
Dnajb6	NM_001127367	1	mghv-miR-M1-8-AS-5p_x8	164	-19.88	2	21	348	369	0.6316
Dnajc1	NM_007869	1	mghv-miR-M1-6*_x58	162	-19.34	2	21	355	381	0.75
Dnajc10	NM_024181	1	mghv-miR-M1-13-5p_x2701	184	-32.09	2	21	1016	1037	0.8421
Dnajc11	NM_172704	4	mghv-miR-M1-8_x1482	175	-31.84	2	20	805	827	0.7778
			mghv-miR-M1-8_x33513	170	-34.64	2	19	804	826	0.7647
			mghv-miR-M1-8_x1864	165	-30.82	2	18	804	825	0.75
			mghv-miR-M1-13_x133	160	-19.08	2	22	68	92	0.6818
Dnajc14	NM_028873	1	mghv-miR-M1-6_x852	161	-17.46	2	22	1311	1333	0.65
Dnajc16	NM_172338	1	mghv-miR-M1-8_x33513	162	-29.88	2	21	1357	1383	0.6957
Dnajc18	NM_029669	1	mghv-miR-M1-10-5p_x12	162	-18.59	2	19	17	37	0.7059
Dnajc19	NM_001026211	1	mghv-miR-M1-13-5p_x2701	162	-23.3	2	21	12	32	0.7368
Dnajc27	NM_153082	2	mghv-miR-M1-1_x1342	162	-18.61	2	15	135	156	0.8462
			mghv-miR-M1-8_x1864	162	-27.41	2	21	143	163	0.6842
Dnajc5	NM_016775	3	mghv-miR-M1-2-5p_x590	170	-30.85	2	20	2386	2408	0.8421
			mghv-miR-M1-2-5p_x110	160	-27.55	2	18	2385	2406	0.8235
			mghv-miR-M1-14-5p_x94	160	-23.41	2	19	1384	1407	0.8
Dnalc1	NM_028821	1	mghv-miR-M1-2-5p_x590	169	-27.92	2	18	426	447	0.875
Dnali1	NM_175223	2	mghv-miR-M1-2-5p_x110	160	-23.76	2	17	569	589	0.8
			mghv-miR-M1-3_x1229	168	-24.63	2	22	276	299	0.7143
Dnase1l3	NM_007870	1	mghv-miR-M1-13-5p_x2701	167	-23.56	2	21	534	556	0.75
Dnm1	NM_010065	1	mghv-miR-M1-8_x1864	164	-27.66	2	21	917	937	0.8
Dnm3	NM_001038619	1	mghv-miR-M1-6_x852	161	-22.19	2	19	2422	2446	0.6842
Dnmt3a	NM_007872	1	mghv-miR-M1-2-5p_x6528	161	-25.6	2	22	2948	2970	0.65
Dnttip1	NM_133763	1	mghv-miR-M1-8-AS-3p_x2	168	-24.21	2	19	67	87	0.8824
Doc2b	NM_007873	1	mghv-miR-M1-14-5p_x94	163	-20.49	2	17	509	530	0.8125
Dock1	NM_001033420	1	mghv-miR-M1-8_x1482	171	-29.95	2	20	785	807	0.7222
Dock11	NM_001009947	1	mghv-miR-M1-12_x85	160	-22.97	2	23	90	115	0.6957
Dock3	NM_153413	2	mghv-miR-M1-2-5p_x9704	160	-22.16	2	22	2493	2516	0.7143
			mghv-miR-M1-7-5p_x16	178	-33.83	2	23	8	31	0.7619
Dock4	NM_172803	1	mghv-miR-M1-1_x1342	165	-21.93	2	14	405	426	1
Dock5	NM_177780	1	mghv-miR-M1-14-5p_x94	161	-26.22	2	19	146	168	0.6842
Dok2	NM_010071	1	mghv-miR-M1-1_x1342	176	-26.02	2	21	232	253	0.7895
Dolpp1	NM_020329	3	mghv-miR-M1-2-5p_x6528	164	-27.16	2	22	1214	1237	0.7143
			mghv-miR-M1-2-5p_x9704	161	-27.82	2	22	849	868	0.75
			mghv-miR-M1-6*_x58	162	-19.9	2	15	1274	1295	0.9231
Dos	NM_001195268	2	mghv-miR-M1-8_x254	174	-30.51	2	23	644	667	0.7143
			mghv-miR-M1-8_x1482	169	-30.84	2	22	644	666	0.7
Dpcd	NM_172639	1	mghv-miR-M1-8_x1864	162	-33.42	2	21	5	29	0.7273
Dpcr1	NM_001033366	1	mghv-miR-M1-13-5p_x2701	160	-25.51	2	21	646	665	0.7895
Dpf1	NM_013874	2	mghv-miR-M1-6_x852	162	-21.63	2	22	419	442	0.6818
			mghv-miR-M1-8_x1864	161	-26.15	2	19	664	687	0.7368
Dpf2	NM_011262	1	mghv-miR-M1-6*_x58	164	-22.11	2	17	1239	1260	0.8667
Dpf3	NM_058212	1	mghv-miR-M1-2-5p_x5697	160	-26.1	2	21	24	45	0.7895
Dph3	NM_001047433	2	mghv-miR-M1-6_x852	160	-20.42	2	22	735	758	0.6667
			mghv-miR-M1-8_x254	162	-23.17	2	23	2126	2149	0.6667
Dpp4	NM_001159543	1	mghv-miR-M1-5*_x390	167	-31.41	2	18	492	512	0.875
Dpp4	NM_010074	1	mghv-miR-M1-1*_x18	160	-18.4	2	21	1652	1673	0.6842
Dpp8	NM_028906	1	mghv-miR-M1-5*_x390	172	-33.16	2	21	1630	1649	0.8947
Dpt	NM_019759	1	mghv-miR-M1-8_x1864	161	-25.82	2	19	661	683	0.7778
Dpy19l3	NM_178704	4	mghv-miR-M1-8_x1482	161	-26.6	2	22	306	328	0.65
			mghv-miR-M1-8_x33513	161	-29.96	2	22	305	327	0.65
			mghv-miR-M1-8-AS-5p_x8	171	-28.83	2	21	305	327	0.75
			mghv-miR-M1-10-5p_x12	163	-14.31	2	20	157	177	0.7778
Dpys	NM_001164466	1	mghv-miR-M1-5_x63444	160	-20.24	2	20	89	110	0.75
Dpysl4	NM_011993	3	mghv-miR-M1-2-5p_x6528	171	-30.33	2	22	102	123	0.8
			mghv-miR-M1-2-5p_x5697	166	-32.59	2	21	100	122	0.7895
			mghv-miR-M1-2-5p_x9704	161	-29.16	2	20	100	121	0.7778
Dr1	NM_026106	1	mghv-miR-M1-13-5p_x2701	167	-23.38	2	21	1423	1446	0.7143
Dram1	NM_027878	1	mghv-miR-M1-6_x852	161	-19.09	2	22	25	47	0.6
Drd5	NM_013503	1	mghv-miR-M1-2-5p_x110	160	-20.8	2	18	67	88	0.7647
Dsc2	NM_013505	1	mghv-miR-M1-2-5p_x110	160	-26.23	2	20	1514	1532	0.7778
Dscr3	NM_007834	1	mghv-miR-M1-8_x33513	163	-25.81	2	21	1127	1150	0.65
Dsg2	NM_007883	2	mghv-miR-M1-2-5p_x6528	163	-33.85	2	22	1216	1237	0.75
			mghv-miR-M1-2-5p_x5697	163	-32.66	2	22	1214	1236	0.75
Dtl	NM_029766	1	mghv-miR-M1-8_x254	160	-28.35	2	23	147	172	0.6522
Dtna	NM_207650	3	mghv-miR-M1-6*_x46	178	-29.85	2	20	1959	1983	0.8571
			mghv-miR-M1-10-5p_x12	161	-17.14	2	19	2247	2268	0.7778
			mghv-miR-M1-10-AS-5p_x1	166	-19.74	2	19	3010	3032	0.8235
Dtx3l	NM_001013371	2	mghv-miR-M1-3_x1229	161	-28.14	2	15	2405	2428	0.9286
			mghv-miR-M1-8_x33513	161	-25.34	2	19	1000	1026	0.7143
Dusp11	NM_028099	3	mghv-miR-M1-2-5p_x5697	165	-23.97	2	22	4139	4162	0.6
			mghv-miR-M1-2-5p_x9704	160	-24.46	2	21	4139	4161	0.5789
			mghv-miR-M1-6_x852	171	-24.63	2	22	4213	4234	0.7
Dusp13	NM_001007268	1	mghv-miR-M1-6_x852	160	-19.14	2	21	177	199	0.6316
Dusp15	NM_001159376	1	mghv-miR-M1-12_x85	160	-21.72	2	21	955	978	0.6842
Dusp16	NM_001048054	1	mghv-miR-M1-6*_x58	162	-25.09	2	20	2134	2158	0.7619
Dusp18	NM_173745	2	mghv-miR-M1-1_x1342	168	-17.49	2	21	292	313	0.7368
			mghv-miR-M1-2-5p_x9704	161	-26.32	2	20	2540	2561	0.7778
Dusp22	NM_001037955	1	mghv-miR-M1-3_x1229	163	-19.59	2	20	181	203	0.7222
Dusp23	NM_026725	2	mghv-miR-M1-2-5p_x6528	167	-32.29	2	22	8	29	0.75
			mghv-miR-M1-2-5p_x5697	167	-32.64	2	22	6	28	0.75
Dusp26	NM_025869	1	mghv-miR-M1-13-5p_x2701	161	-23.59	2	20	282	302	0.7778
Dusp3	NM_028207	1	mghv-miR-M1-7-5p_x16	162	-28.65	2	23	3179	3202	0.619
Dusp4	NM_176933	2	mghv-miR-M1-8*_x129	160	-20.15	2	21	705	726	0.6842
			mghv-miR-M1-9_x57	176	-22.59	2	21	332	353	0.8421
Dusp8	NM_008748	1	mghv-miR-M1-2-5p_x5697	163	-26.7	2	21	1871	1895	0.7
Dut	NM_001159646	1	mghv-miR-M1-13_x133	160	-19.68	2	17	385	407	0.7333
Dvl2	NM_007888	1	mghv-miR-M1-12*_x10	170	-25.5	2	20	355	378	0.7895
Dync1li2	NM_001013380	1	mghv-miR-M1-10-AS-5p_x1	169	-18.09	2	22	1035	1055	0.85
Dynll2	NM_001168471	3	mghv-miR-M1-2-5p_x6528	162	-23.12	2	19	1044	1066	0.7647
			mghv-miR-M1-4_x56	168	-17.35	2	21	297	319	0.7895
			mghv-miR-M1-4_x32	163	-18.15	2	20	297	318	0.7778
Dynlrb1	NM_025947	1	mghv-miR-M1-2-5p_x5697	162	-24.51	2	23	241	264	0.6667
Dynlt1f	NM_001199948	2	mghv-miR-M1-2-5p_x110	165	-26.65	2	20	150	169	0.8333
			mghv-miR-M1-2-5p_x110	165	-26.65	2	20	150	169	0.8333
Dyrk1a	NM_001113389	2	mghv-miR-M1-8_x254	168	-26.55	2	23	2064	2086	0.7143
			mghv-miR-M1-8_x1482	163	-27.35	2	22	2064	2085	0.7
Dyx1c1	NM_001163725	1	mghv-miR-M1-14_x106	160	-20.36	2	19	15	39	0.8
Dzip1l	NM_028258	1	mghv-miR-M1-9_x57	161	-21.65	2	19	186	208	0.7222
E130003G02Rik	NM_001242940	2	mghv-miR-M1-10-5p_x78	161	-21.69	2	18	1487	1508	0.8125
			mghv-miR-M1-10-AS-5p_x1	176	-22.13	2	22	1485	1508	0.8095
E130203B14Rik	NM_178791	1	mghv-miR-M1-10-5p_x78	160	-19.19	2	21	1505	1526	0.6842
E130304F04Rik	NM_175538	4	mghv-miR-M1-8-AS-5p_x8	161	-19.62	2	20	637	657	0.7222
			mghv-miR-M1-8-AS-5p_x8	161	-19.62	2	20	637	657	0.7222
			mghv-miR-M1-14_x106	161	-21.85	2	15	1847	1869	0.9286
			mghv-miR-M1-14_x106	161	-21.85	2	15	1847	1869	0.9286
E130306D19Rik	NM_001013377	1	mghv-miR-M1-14-5p_x94	163	-19.74	2	20	80	100	0.7222
E130309D02Rik	NM_172726	1	mghv-miR-M1-6_x852	161	-16.96	2	22	573	595	0.6
E130309D14Rik	NM_001013784	3	mghv-miR-M1-10-5p_x12	172	-24.24	2	17	2423	2443	0.9333
			mghv-miR-M1-10-5p_x78	167	-25.46	2	16	2421	2442	0.9286
			mghv-miR-M1-10-AS-5p_x1	160	-19.48	2	17	2420	2442	0.8
E230025N22Rik	NM_172831	1	mghv-miR-M1-12_x85	164	-24.2	2	18	253	277	0.8235
E2f2	NM_177733	1	mghv-miR-M1-2_x4	164	-29.66	2	17	1264	1285	0.8667
E2f3	NM_010093	1	mghv-miR-M1-8_x1482	171	-26.48	2	20	1323	1345	0.7778
E2f5	NM_007892	1	mghv-miR-M1-6_x852	164	-16.91	2	21	215	237	0.6842
E2f7	NM_178609	3	mghv-miR-M1-2-5p_x6528	164	-28.65	2	22	1218	1241	0.7143
			mghv-miR-M1-2-5p_x5697	161	-29.17	2	23	1216	1240	0.6818
			mghv-miR-M1-8_x1864	160	-26.51	2	20	399	418	0.7222
E330016A19Rik	NM_173386	1	mghv-miR-M1-5_x63444	161	-21.78	2	14	385	405	0.9167
E330033L03	NM_001243265	1	mghv-miR-M1-2-5p_x5697	164	-26.41	2	23	495	517	0.6667
Eaf2	NM_001113401	1	mghv-miR-M1-2-5p_x5697	161	-24.56	2	22	836	859	0.7
Ebf1	NM_007897	1	mghv-miR-M1-2_x4	162	-27.3	2	15	159	180	0.9231
Ebf2	NM_010095	2	mghv-miR-M1-2-5p_x6528	167	-32.45	2	22	739	760	0.75
			mghv-miR-M1-10-5p_x78	160	-19.78	2	21	1584	1605	0.6842
Ebna1bp2	NM_026932	3	mghv-miR-M1-2-5p_x6528	160	-30.7	2	22	1252	1277	0.6522
			mghv-miR-M1-7-5p_x16	163	-28.5	2	16	388	411	0.8571
			mghv-miR-M1-14_x106	162	-17.46	2	21	1229	1249	0.7895
Ece1	NM_199307	2	mghv-miR-M1-2-5p_x6528	165	-28.09	2	18	1365	1387	0.8125
			mghv-miR-M1-2-5p_x5697	160	-26.62	2	17	1363	1386	0.8
Ece2	NM_139293	1	mghv-miR-M1-13_x133	160	-19.43	2	19	342	363	0.7647
Echdc2	NM_001254754	1	mghv-miR-M1-7-5p_x16	161	-22.07	2	18	60	83	0.75
Echs1	NM_053119	2	mghv-miR-M1-2-5p_x590	162	-27.3	2	19	265	286	0.7059
			mghv-miR-M1-3_x1229	161	-19.88	2	22	388	410	0.6
Ecm2	NM_001012324	2	mghv-miR-M1-8_x33513	167	-28.14	2	21	680	704	0.7143
			mghv-miR-M1-8_x1864	162	-28.83	2	20	680	703	0.7
Eda	NM_001177937	2	mghv-miR-M1-1_x1342	160	-18.62	2	19	3393	3413	0.7059
			mghv-miR-M1-2-5p_x110	160	-24.23	2	17	1018	1038	0.8
Eda2r	NM_001161432	2	mghv-miR-M1-5*_x390	160	-21.38	2	21	308	329	0.7368
			mghv-miR-M1-9_x57	163	-13.39	2	20	2373	2394	0.7222
Edar	NM_010100	1	mghv-miR-M1-8_x33513	161	-27.04	2	22	720	742	0.6
Edaradd	NM_133643	4	mghv-miR-M1-2-5p_x110	173	-28.19	2	18	3975	3995	0.875
			mghv-miR-M1-6*_x46	162	-25.37	2	20	6071	6095	0.7143
			mghv-miR-M1-8_x33513	160	-19.62	2	22	2533	2556	0.7143
			mghv-miR-M1-14-5p_x94	162	-18.64	2	20	2500	2521	0.7368
Edem1	NM_138677	5	mghv-miR-M1-3_x1229	172	-27.63	2	1900-01-21	107	129	0.7368
			mghv-miR-M1-3_x1229	160	-25.09	2	13	1	12	1
			mghv-miR-M1-8-AS-3p_x2	160	-21.2	2	21	2431	2449	0.7895
			mghv-miR-M1-13-5p_x2701	160	-21.75	2	21	3242	3263	0.6842
			mghv-miR-M1-14-5p_x94	169	-24.28	2	20	695	714	0.7778
Edn3	NM_007903	1	mghv-miR-M1-2-5p_x9704	163	-22.28	2	21	677	700	0.75
Eef2k	NM_001251826	3	mghv-miR-M1-1_x1342	163	-25.56	2	21	38	62	0.6818
			mghv-miR-M1-2-5p_x6528	184	-35.28	2	22	3566	3589	0.8571
			mghv-miR-M1-2-5p_x5697	179	-38.05	2	21	3564	3588	0.85
Efha2	NM_030110	1	mghv-miR-M1-2-5p_x110	165	-21.25	2	19	1486	1508	0.7895
Efna3	NM_010108	2	mghv-miR-M1-2-5p_x5697	166	-29.19	2	21	425	447	0.7368
			mghv-miR-M1-2-5p_x9704	161	-29.68	2	20	425	446	0.7222
Efnb2	NM_010111	3	mghv-miR-M1-8_x33513	178	-30.76	2	19	1983	2005	0.8235
			mghv-miR-M1-8_x1864	173	-31.45	2	18	1983	2004	0.8125
			mghv-miR-M1-14_x106	167	-21.94	2	21	110	132	0.75
Efr3a	NM_133766	1	mghv-miR-M1-2_x4	162	-22.68	2	15	1395	1416	0.9231
Efr3b	NM_001082483	2	mghv-miR-M1-2_x4	168	-30.75	2	21	3280	3301	0.7368
			mghv-miR-M1-4_x32	160	-23.45	2	21	1587	1608	0.6842
Egfl7	NM_001164564	1	mghv-miR-M1-2_x4	160	-27.97	2	19	139	159	0.8235
Egr3	NM_018781	1	mghv-miR-M1-2-5p_x5697	161	-27.26	2	23	118	142	0.6364
Ehbp1	NM_001252515	1	mghv-miR-M1-2-5p_x9704	162	-27.82	2	20	6	29	0.7368
Ehf	NM_007914	1	mghv-miR-M1-7-3p_x235	160	-16.38	2	19	894	913	0.8235
Eid1	NM_025613	1	mghv-miR-M1-9_x57	171	-23.16	2	21	528	551	0.7619
Eid2b	NM_001177427	1	mghv-miR-M1-7-5p_x16	160	-23.91	2	19	308	330	0.7647
Eif1ad	NM_027236	1	mghv-miR-M1-10_x122	161	-14.06	2	20	625	645	0.7778
Eif2c2	NM_153178	2	mghv-miR-M1-2-5p_x9704	164	-25.6	2	21	1899	1921	0.7368
			mghv-miR-M1-6_x852	161	-18.19	2	20	4318	4342	0.75
Eif2c4	NM_153177	3	mghv-miR-M1-2-5p_x110	165	-30.35	2	20	1542	1561	0.7778
			mghv-miR-M1-14-5p_x734	166	-23.5	2	20	2879	2904	0.75
			mghv-miR-M1-14-5p_x1936	161	-24.67	2	19	2879	2903	0.7368
Eif3b	NM_133916	2	mghv-miR-M1-10-5p_x78	176	-23.07	2	21	101	122	0.8421
			mghv-miR-M1-10-AS-5p_x1	168	-18.41	2	21	100	122	0.7368
Eif4a1	NM_001159375	1	mghv-miR-M1-8_x33513	166	-27.46	2	20	424	449	0.7143
Eif4b	NM_145625	1	mghv-miR-M1-1_x1342	164	-20.16	2	17	728	749	0.8
Eif4e3	NM_025829	2	mghv-miR-M1-2-5p_x6528	164	-25.99	2	19	767	788	0.8235
			mghv-miR-M1-2-5p_x5697	160	-27.39	2	23	765	787	0.7143
Eif4g2	NM_001040131	2	mghv-miR-M1-1_x1342	161	-14.43	2	18	4630	4651	0.75
			mghv-miR-M1-5_x63444	162	-22.19	2	20	991	1012	0.7368
Eif5b	NM_198303	1	mghv-miR-M1-10-AS-3p_x3	160	-20.96	2	22	2596	2619	0.6667
Elavl1	NM_010485	4	mghv-miR-M1-1_x1342	175	-22.78	2	21	2661	2683	0.85
			mghv-miR-M1-7-5p_x16	165	-29.01	2	23	3689	3713	0.7273
			mghv-miR-M1-8_x33513	163	-22.79	2	22	1879	1900	0.75
			mghv-miR-M1-8-AS-5p_x8	184	-29.26	2	21	1879	1900	0.8947
Elavl3	NM_010487	1	mghv-miR-M1-8_x1864	170	-30.42	2	20	1108	1130	0.7895
Elf4	NM_019680	2	mghv-miR-M1-2-5p_x5697	163	-25.27	2	21	3305	3329	0.7
			mghv-miR-M1-6_x852	160	-18.25	2	22	3173	3197	0.6364
Elf5	NM_001145813	1	mghv-miR-M1-2-5p_x6528	160	-25.05	2	21	71	93	0.6842
Elfn1	NM_175522	1	mghv-miR-M1-14_x106	162	-19.39	2	20	862	884	0.7368
Elfn2	NM_183141	2	mghv-miR-M1-12_x85	161	-21.38	2	15	1160	1184	0.9286
			mghv-miR-M1-13_x133	167	-22.73	2	16	1626	1648	0.8571
Ell	NM_007924	1	mghv-miR-M1-6*_x46	166	-25.04	2	17	553	573	0.9333
Elmo1	NM_080288	1	mghv-miR-M1-2-5p_x110	165	-28.25	2	20	2378	2397	0.7778
Elmo2	NM_080287	1	mghv-miR-M1-2-5p_x5697	163	-30.35	2	20	665	688	0.7222
Eln	NM_007925	3	mghv-miR-M1-2-5p_x5697	165	-30.36	2	22	399	420	0.8
			mghv-miR-M1-2-5p_x9704	164	-24.48	2	17	179	201	0.8667
			mghv-miR-M1-2-5p_x9704	160	-30.85	2	21	399	419	0.7895
Elovl1	NM_001039175	3	mghv-miR-M1-2-5p_x6528	164	-27.17	2	22	239	262	0.7143
			mghv-miR-M1-2-5p_x5697	160	-27.5	2	22	237	261	0.6667
			mghv-miR-M1-8-AS-3p_x2	160	-23.56	2	17	671	692	0.8
Elovl2	NM_019423	1	mghv-miR-M1-4_x56	161	-23.2	2	18	1478	1500	0.6875
Elovl4	NM_001145974	1	mghv-miR-M1-2-5p_x6528	160	-27.12	2	21	1624	1644	0.7368
Elovl7	NM_029001	1	mghv-miR-M1-2-5p_x110	161	-23.76	2	20	4351	4370	0.7778
Elp2	NM_021448	2	mghv-miR-M1-2-5p_x5697	165	-26.2	2	23	107	132	0.6522
			mghv-miR-M1-2-5p_x9704	160	-25.46	2	22	107	131	0.6364
Elp3	NM_001253812	3	mghv-miR-M1-2-5p_x5697	164	-26.49	2	22	97	121	0.7143
			mghv-miR-M1-2-5p_x110	165	-24.85	2	18	77	97	0.75
			mghv-miR-M1-6_x852	163	-15.48	2	22	211	232	0.7
Elp4	NM_023876	2	mghv-miR-M1-6_x852	163	-16.34	2	20	1088	1110	0.6667
			mghv-miR-M1-13-5p_x2701	165	-20.7	2	19	1468	1491	0.7895
Emb	NM_010330	1	mghv-miR-M1-2-5p_x590	162	-20.8	2	19	220	241	0.7059
Emid2	NM_024474	1	mghv-miR-M1-2_x4	162	-26.65	2	15	215	236	0.9231
Emilin3	NM_182840	1	mghv-miR-M1-1_x1342	160	-17.78	2	21	950	971	0.6842
Eml1	NM_001043335	1	mghv-miR-M1-14_x106	161	-19.02	2	19	1161	1184	0.7895
Eml4	NM_001114361	1	mghv-miR-M1-1_x1342	163	-22.33	2	19	2114	2135	0.8333
Eml5	NM_001081191	1	mghv-miR-M1-6_x852	160	-19.16	2	19	2755	2776	0.7059
Enam	NM_017468	1	mghv-miR-M1-13_x133	161	-18.6	2	22	151	171	0.75
Enc1	NM_007930	1	mghv-miR-M1-10-AS-5p_x1	166	-19.88	2	20	2202	2225	0.7895
Endou	NM_001168693	1	mghv-miR-M1-2-5p_x110	164	-22.84	2	17	485	505	0.8667
Engase	NM_172573	1	mghv-miR-M1-3_x1229	162	-18.61	2	22	563	583	0.75
Eno1	NM_023119	3	mghv-miR-M1-2-5p_x6528	161	-27.59	2	19	253	276	0.7778
			mghv-miR-M1-2-5p_x5697	161	-29.1	2	23	251	275	0.6818
			mghv-miR-M1-10_x122	162	-18.25	2	19	225	246	0.7647
Eno2	NM_013509	1	mghv-miR-M1-14-5p_x94	162	-20.62	2	19	102	122	0.7647
Enox1	NM_001253759	1	mghv-miR-M1-2_x4	163	-32.56	2	21	59	82	0.7143
Enox2	NM_145951	1	mghv-miR-M1-9-5p_x18	161	-17.96	2	22	180	202	0.7
Enpp5	NM_001168620	1	mghv-miR-M1-2-5p_x110	166	-28.55	2	20	155	176	0.7895
Entpd7	NM_053103	3	mghv-miR-M1-5_x63444	162	-21.7	2	20	2877	2898	0.7368
			mghv-miR-M1-6*_x46	161	-29.51	2	21	2481	2500	0.7368
			mghv-miR-M1-8_x254	161	-30.59	2	22	2119	2141	0.7143
Eomes	NM_001164789	1	mghv-miR-M1-7-5p_x16	160	-23.33	2	23	75	97	0.6667
Ep400	NM_029337	1	mghv-miR-M1-6_x852	160	-18.9	2	22	134	159	0.6957
Epb4.1l1	NM_001003815	3	mghv-miR-M1-2-5p_x6528	162	-28.1	2	19	2772	2794	0.7059
[truncated: 5,210 more rows]
